# Supplementary material for: Lipid kinases VPS34 and PIKfyve coordinate a phosphoinositide cascade to regulate retriever-mediated recycling on endosomes
Source: eLife journal article supplement (doi:10.7554/elife.69709), 2022-01-18
Supplement: fig1-figsupp1-data1 [file Figure1-figure supplement 1B.xlsx]

## Sheet: Sheet1
Inhibition of PIKfyve does not affect cell viability
Experiment 1	DMSO	total	% live-cells		Apilimod	total	% live-cells		YM201636	total	% live-cells
	live-cell	535			live-cell	797			live-cell	691
	dead cell	3			dead cell	16			dead cell	5
	Total	538	99.4424		total	813	98.032		total	696	99.2816
Experiment 2	DMSO	total	% live cells		Apilimod	total	% live cells		YM201636	total	% live cells
	live-cell	224			live-cell	233			live-cell	257
	dead cell	1			dead cell	0			dead cell	0
	total	225	99.5556		total	233	100		total	257	100
Experiment 3	DMSO	total	% live cells		Apilimod	total	% live cells		YM201636	total	% live cells
	live-cell	229			live-cell	269			live-cell	250
	dead cell	0			dead cell	0			dead cell	0
	total	229	100		total	269	100		total	250	100
