# Supplementary material for: Lipid kinases VPS34 and PIKfyve coordinate a phosphoinositide cascade to regulate retriever-mediated recycling on endosomes
Source: eLife journal article supplement (doi:10.7554/elife.69709), 2022-01-18
Supplement: fig1-figsupp1-data1 [file Figure1-figure supplement 1D.xlsx]

## Sheet: Sheet1
Inhibition of PIKfyve does not affect proliferation
Experiment 1		Total	% proliferating cells
DMSO	DAPI	1160
	Edu	386	33.2759
Apilimod	DAPI	1274
	Edu	337	26.4521
YM201636	DAPI	1043
	Edu	381	36.5292
Experiment 2		Total	% proliferating cells
DMSO	DAPI	760
	Edu	310	40.7895
Apilimod	DAPI	813
	Edu	256	31.4883
YM201636	DAPI	993
	Edu	345	34.7432
Experiment 3		Total	% proliferating cells
DMSO	DAPI	1478
	Edu	334	22.5981
Apilimod	DAPI	1329
	Edu	273	20.5418
YM201636	DAPI	1326
	Edu	357	26.9231
