# Supplementary material for: Lipid kinases VPS34 and PIKfyve coordinate a phosphoinositide cascade to regulate retriever-mediated recycling on endosomes
Source: eLife journal article supplement (doi:10.7554/elife.69709), 2022-01-18
Supplement: fig1-figsupp2-data1 [file Figure1-figure supplement 2B.xlsx]

## Sheet: Sheet1
Figure 1-figure supplement 2B
PIKfyve is required for cell migration-cardiac fibroblasts
Experiment 1	0 h wound width-µm			Average		16 h wound width-µm						Average		Wound closure-µm	% wound healing
DMSO	807	874	798	826.333		322	348	322	329	340	311	328.667		497.667	60.2259
YM201636	803	767	799	789.667		478	403	525	475	454	471	467.667		322	40.7767
Experiment 2	0 h wound width-µm			Average		16 h wound width-µm						Average		Wound closure-µm	% wound healing
DMSO	812	843	740	798.333		330	329	408	320	413	394	365.667		432.667	54.1962
YM201636	897	863	842	867.333		497	594	555	521	476	520	527.167		340.167	39.2198
Experiment 3	0 h wound width-µm			Average		16 h wound width-µm						Average		Wound closure-µm	% wound healing
DMSO	905	860	859	874.667		547	524	327	484	617	463	493.667		381	43.5595
YM201636	850	818	808	825.333		729	688	776	676	660	731	710		115.333	13.9742
