# Supplementary material for: Lipid kinases VPS34 and PIKfyve coordinate a phosphoinositide cascade to regulate retriever-mediated recycling on endosomes
Source: eLife journal article supplement (doi:10.7554/elife.69709), 2022-01-18
Supplement: fig1-figsupp2-data1 [file Figure1-figure supplement 2D.xlsx]

## Sheet: Sheet1
Figure 1-figure supplement 2D
PIKfyve is required for cell migration-Primary MEF
Experiment 1	0 h wound area-µm2		Average		12 h wound area-µm2		Average		Wound closure-µm2	% wound healing
Wild-type	229274	235781	232527		66042.7	62859.3	64451		168076	72.2824
PIKfyve β-geo/ β-geo	344866	340701	342783		214901	195206	205054		137730	40.1798
Experiment 2	0 h wound area-µm2		Average		12 h wound area-µm2		Average		Wound closure-µm2	% wound healing
Wild-type	293660	297114	295387		108204	160365	134284		161102	54.5395
PIKfyve β-geo/ β-geo	325655	329810	327732		228983	223213	226098		101634	31.0114
Experiment 3	0 h wound area-µm2		Average		12 h wound area-µm2		Average		Wound closure-µm2	% wound healing
Wild-type	262930	265757	264343		58476.5	78377.9	68427.2		195916	74.1143
PIKfyve β-geo/ β-geo	285218	277297	281258		183944	149936	166940		114318	40.6452
