# Supplementary material for: Lipid kinases VPS34 and PIKfyve coordinate a phosphoinositide cascade to regulate retriever-mediated recycling on endosomes
Source: eLife journal article supplement (doi:10.7554/elife.69709), 2022-01-18
Supplement: fig1-figsupp2-data1 [file Figure1-figure supplement 2F.xlsx]

## Sheet: Sheet1
Figure 1-figure supplement 2F
PIKfyve is required for cell spreading-HeLa cells
Experiment 1		Total	% spreading cells
DMSO	unspreaded	191
	spreaded	149	43.8235
Apilimod	unspreaded	147
	spreaded	40	21.3904
Experiment 2		Total	% spreading cells
DMSO	unspreaded	195
	spreaded	144	42.4779
Apilimod	unspreaded	211
	spreaded	47	18.2171
Experiment 3		Total	% spreading cells
DMSO	unspreaded	168
	spreaded	112	40
Apilimod	unspreaded	159
	spreaded	41	20.5
