# Supplementary material for: Lipid kinases VPS34 and PIKfyve coordinate a phosphoinositide cascade to regulate retriever-mediated recycling on endosomes
Source: eLife journal article supplement (doi:10.7554/elife.69709), 2022-01-18
Supplement: fig1-figsupp2-data1 [file Figure1-figure supplement 2H.xlsx]

## Sheet: Sheet1
Figure 1-figure supplement 2H
Cell migration is not elevated when there is no induction of the hyperactive mutant of PIKfyve-Flp-in HEK293T
Experiment 1	0 h wound area-µm2		Average		12 h wound area-µm2		Average		Wound closure-µm2	% wound healing
3XFlag	281906	277737	279821		107009	126643	116826		162996	58.2498
PIKfyve	294500	275212	284856		139382	111633	125508		159349	55.94
PIKfyve-KYA	259470	297758	278614		117361	95507.3	106434		172180	61.7988
Experiment 2	0 h wound area-µm2		Average		12 h wound area-µm2		Average		Wound closure-µm2	% wound healing
3XFlag	308852	289767	299309		107287	126670	116978		182331	60.9172
PIKfyve	270024	257831	263928		124799	102264	113531		150396	56.9839
PIKfyve-KYA	259395	288388	273892		79791.7	88702.8	84247.2		189644	69.2407
Experiment 3	0 h wound area-µm2		Average		12 h wound area-µm2		Average		Wound closure-µm2	% wound healing
3XFlag	326660	270579	298620		92436.7	110829	101633		196987	65.9657
PIKfyve	282621	278512	280566		82414.2	104271	93342.4		187224	66.7307
PIKfyve-KYA	258463	258211	258337		67406.2	130684	99045.2		159292	61.6605
