# Supplementary material for: Lipid kinases VPS34 and PIKfyve coordinate a phosphoinositide cascade to regulate retriever-mediated recycling on endosomes
Source: eLife journal article supplement (doi:10.7554/elife.69709), 2022-01-18
Supplement: fig1-figsupp3-data1 [file Figure1-figure supplement 3C.xlsx]

## Sheet: Sheet1
Figure 1-figure supplement 3C
Effect of Pikfyv siRNA and rescue on b1-integrin levels
	Integrated density values						Normalized to control siRNA treatment
		PIKfyve siRNA						PIKfyve siRNA
	ctrl siRNA	no transfection	WT PIKfyve		ctrl avg		ctrl siRNA	no transfection	WT PIKfyve
EXP1	26881.4	68290	36279.9		41513		0.647543	1.64503	0.873942
	52059.3	61433.2	26107.4				1.25405	1.47986	0.628899
	34512.8	52029.9	46875				0.831375	1.25334	1.12916
	31337.6	53553.3	108551				0.754886	1.29004	2.61487
	44712.1	72675.9	94189				1.07706	1.75068	2.2689
	22794.9	40182.5	19250.5				0.549102	0.967952	0.463724
	31286.1	50200.3	26188.9				0.753646	1.20927	0.630861
	34190	58332.4	15519.1				0.823597	1.40516	0.373837
	35006.4	43611.1	16212.2				0.843264	1.05054	0.390532
	35967.5	21904.4	30035.8				0.866417	0.527652	0.723528
	44247.4	10737.2	33040				1.06587	0.258647	0.795896
	31492.6	13873.7	23928.9				0.758621	0.334203	0.57642
	27817.5	24424	16426.4				0.670093	0.588345	0.395694
	30225.4	24836.6	24617.9				0.728097	0.598285	0.593016
	43061.6	22532	21569.4				1.03731	0.542771	0.519582
	32296	13141.5	32952.6				0.777974	0.316564	0.79379
	52236.8	20769.3	37232.2				1.25832	0.50031	0.896882
	50673.4	25573.8	107803				1.22067	0.616045	2.59686
	36595.9	18522.5	96566.7				0.881555	0.446186	2.32618
	72690.6	18526.8	41004.8				1.75103	0.44629	0.987759
	43688.8	59657.4	41998.3				1.05241	1.43708	1.01169
	62623.4	17455.6	31450.3				1.50853	0.420485	0.757602
	46924	87199.7	15913.1				1.13035	2.10054	0.383328
	43982.1	50263.1	41633.3				1.05948	1.21078	1.0029
	74087.7	49393.3	50777.5				1.78469	1.18983	1.22317
	41093.7	40774.1					0.9899	0.982202
	43126.5	63503.4					1.03887	1.52972
	62100.7	38108.8					1.49594	0.917997
	42482.4	45679.9					1.02335	1.10038
	45522.8	44243.6					1.09659	1.06578
	37237.3	45897.6					0.897004	1.10562
	42026.9	32846					1.01238	0.791222
	48195.7	20609.1					1.16098	0.49645
	25782.9	17131.2					0.62108	0.412671
	41051	20484.5					0.988872	0.493448
	24876.4	23768.8					0.599245	0.572563
	42951.1	69520.5					1.03464	1.67467
	46552.2	23233					1.12139	0.559657
	42465.5	23129.3					1.02295	0.557159
	38101.9	23553					0.917831	0.567364
	38290.8	21251.9					0.922381	0.511934
	23031.4	43438.3					0.5548	1.04638
	36952.5	36818.6					0.890144	0.886918
	60756.3	34944.7					1.46355	0.841778
	43762.4	14269.3					1.05419	0.343731
	35412.3	10158.8					0.853041	0.244714
	30450.8	9449.49					0.733524	0.227627
	27900.4	7998.81					0.67209	0.192682
	52935.5	5910.23					1.27515	0.142371
	52130.2	6566.14					1.25576	0.158171
	50580	6208.94					1.21842	0.149566
		7169.39						0.172702
		22135.6						0.53322
		10153.2						0.24458
		11640						0.280395
		20325						0.489606
		19006.2						0.457837
		29294.2						0.705663
		27657.8						0.666246
		8165.36						0.196694
EXP2	31807.4	27252.3	77774.3		28270		1.12513	0.964	2.75112
	39392.8	12002.4	39767.7				1.39345	0.424564	1.40671
	21035.7	14262.5	13809.1				0.7441	0.504511	0.48847
	34001.3	10641.7	13350.2				1.20273	0.376429	0.472239
	24006.1	20785.9	12777.2				0.84917	0.735264	0.451969
	25798	26592.4	11152.5				0.912557	0.940655	0.394499
	26319.2	12646.4	15117				0.930992	0.447342	0.534736
	27404	15236.7	12435				0.969365	0.53897	0.439865
	39248.6	11868.4	9208.97				1.38835	0.419821	0.32575
	32542.9	18115.7	13372				1.15114	0.640809	0.473009
	41448.2	9900.08	8114.42				1.46615	0.350197	0.287033
	48607	12291.4	13147.4				1.71938	0.434784	0.465064
	19688.3	22923.5	22678.7				0.696437	0.810877	0.802217
	18838.6	32849.6	14905.7				0.66638	1.16199	0.527261
	33659.3	20650.8	12799.5				1.19063	0.730482	0.452758
	23093.8	23688.6	14902.6				0.816902	0.83794	0.527151
	20275.1	13828.8	22780.8				0.717194	0.489168	0.805828
	33750.6	26112.1	31743				1.19386	0.923665	1.12285
	39332	27920.3	28124.1				1.3913	0.987628	0.994837
	30000.4	26925.3	22740.3				1.06121	0.952434	0.804397
	20907.4	37808.1	14539.3				0.739562	1.33739	0.514301
	25856.8	39710.9	15999.5				0.914638	1.4047	0.565953
	23279.8	36178.7	15805.1				0.823481	1.27976	0.559075
	33097.6	48636.8	20942				1.17077	1.72043	0.740784
	40546.7	27704.4	22574.1				1.43426	0.97999	0.798516
	23410.2	19987.5	27665.4				0.828093	0.707019	0.978612
	23826.1	15407.9	53805.8				0.842804	0.545027	1.90328
	32702.3	33944.5	63730.3				1.15678	1.20073	2.25434
	43052.5	31436.9	47969.5				1.5229	1.11202	1.69683
	25755.2	21788.8	39970.4				0.911041	0.770738	1.41388
	25541.8	27018	46651.1				0.903495	0.955713	1.6502
	15617.6	27027.3	25534.8				0.552444	0.956041	0.903247
	38268.2	31494	29350.3				1.35367	1.11404	1.03821
	35221	16897.7	26589.2				1.24588	0.597724	0.940545
	41872.3	22445.9	28846.3				1.48115	0.793982	1.02038
	17103.3	19625.1	22662.9				0.604998	0.694202	0.801656
	10502	26925.6	17177				0.371489	0.952445	0.607605
	10691.7	20767.9	70034.9				0.378201	0.734625	2.47736
	6940.59	15363.2	47116.3				0.24551	0.543446	1.66665
	17836.5	21973.5	43807.9				0.630933	0.777272	1.54962
	39655.5	41975.1	24984.5				1.40274	1.48479	0.883781
	38135.6	18441.4	23932				1.34897	0.652329	0.846548
	14736.9	18710.4	22815.6				0.521291	0.661845	0.807059
	17515.8	8271.66	20352.6				0.61959	0.292595	0.719934
	16411	8193.44					0.580507	0.289828
	13773.5	8504.13					0.48721	0.300818
	28333.9	6867.93					1.00226	0.24294
	28427.1	20343.4					1.00556	0.719609
	27023.8	14592.2					0.955917	0.516173
	41651.1	11592.8					1.47333	0.410074
		8794.82						0.3111
		17416.1						0.616062
		12724.5						0.450106
		22182.7						0.784673
		17822.6						0.630441
EXP3	53829	19536.4	49732.5		28516.1		1.88767	0.6851	1.74402
	38358.2	78216	49762.1				1.34514	2.74288	1.74506
	27650.3	24845.2	30580.4				0.969639	0.871271	1.07239
	32505.2	13989.2	29312.4				1.13989	0.490573	1.02793
	20048	32314.6	30014.8				0.703042	1.13321	1.05256
	31913.1	24857.2	18752.4				1.11913	0.871692	0.657607
	58250.6	71183.7	30812.3				2.04273	2.49627	1.08052
	41626.4	12485.4	23629.7				1.45975	0.437836	0.828644
	29919.7	41783.7	35386.9				1.04922	1.46527	1.24095
	36712.4	52743	41701.5				1.28743	1.84959	1.46239
	29080.2	47315.3	32182				1.01979	1.65925	1.12856
	29408	19180.8	79323.6				1.03128	0.672633	2.78172
	36195.8	16659.6	73845				1.26931	0.584217	2.58959
	44722.4	44714.8	106783				1.56832	1.56806	3.74465
	53392.8	49292.7	77908				1.87238	1.7286	2.73207
	36581.7	26441.9	71715.3				1.28284	0.927265	2.51491
	34972.9	37354.7	27502.8				1.22643	1.30995	0.964468
	35928.4	36049.4	20869.7				1.25994	1.26418	0.731858
	39201.2	34140.2	84048				1.37471	1.19723	2.94739
	37752.7	27664.8	112752				1.32391	0.970149	3.95399
	32015.4	32130.3	65044.5				1.12272	1.12675	2.28098
	55703.8	16307.8	80999.3				1.95342	0.571882	2.84048
	51977.1	23392.7					1.82273	0.820333
	47413.2	19336.1					1.66268	0.678078
	27732.8	19883.9					0.972534	0.697287
	26933.2	20831.6					0.944492	0.730521
	32841.1	10875.8					1.15167	0.381391
	26002.8	15606.7					0.911865	0.547294
	26227.1	14821.3					0.919731	0.519752
	17386.3	11807.4					0.609702	0.41406
	28530.7	12045					1.00051	0.422393
	20975.8	16007.3					0.735578	0.561345
	21643.4	15862.4					0.758991	0.556261
	28178.5	11945.9					0.988161	0.418917
	11942.9	25817					0.418815	0.905348
	14113.8	13411.6					0.494942	0.470316
	16878.6	14738.2					0.591897	0.516839
	10753.6	13136.2					0.377106	0.460661
	11466.9	13833.9					0.402122	0.485127
	21292.2	16401.4					0.746674	0.575164
	11261.4	27100.3					0.394913	0.950353
	31226.8	27740.5					1.09506	0.972804
	10143.6	16753.9					0.355716	0.587525
	10025.8	16649.4					0.351584	0.583861
	15761.4	9560.22					0.552722	0.335257
	8721.63	14435.8					0.30585	0.506236
	22727	24961.3					0.796989	0.875341
	13220.1	16946.6					0.463601	0.594283
	11773.8	20560.4					0.412884	0.72101
	12883.2	22119					0.451788	0.775669
		20833.2						0.730579
		16507.5						0.578884
		12725.1						0.446245
		23011.1						0.806953
		25708.9						0.901557
		15284.5						0.535998
		16040.8						0.562517
