# Supplementary material for: Lipid kinases VPS34 and PIKfyve coordinate a phosphoinositide cascade to regulate retriever-mediated recycling on endosomes
Source: eLife journal article supplement (doi:10.7554/elife.69709), 2022-01-18
Supplement: fig2-data1 [file Figure 2K.xlsx]

## Sheet: Sheet1
Effect of apilimod treatment on rate of displace of b1-integrin from the cell surface
	Total intensity of integrin						Intensity of integrin without the 0.8 microns from surface						Percentage of integrin within 0.8 microns from cell surface
		DMSO		Apilimod				DMSO		Apilimod				DMSO		Apilimod
	0 min	15 mins	30 mins	15 mins	30 mins		0 min	15 mins	30 mins	15 mins	30 mins		0 min	15 mins	30 mins	15 mins	30 mins
Experiment 1	4069.51	7347.3	1870	4414.09	3136.01		3220.15	6360.79	1430.11	3971.33	2219.94		20.8715	13.4269	23.5234	10.0306	29.2113
	3606.37	8077.04	3590.98	6460.73	3990.6		2718.88	6823.66	2579.01	5290.35	2990.03		24.609	15.5178	28.1808	18.1154	25.0732
	5701.38	3953.45	4731.96	5449.44	7056.88		4430.73	3260.01	4034.49	4375.64	6181.88		22.2867	17.5401	14.7395	19.7049	12.3992
	2133.24	2941.35	1700.04	4408.85	2975.86		1630.69	2330.29	1180.58	3457.85	1941.64		23.5578	20.7748	30.5561	21.5703	34.7536
	5549.93	5330.04	4539.82	3896.04	4508.16		4364.57	4699.36	3170.52	2973.16	3692.62		21.358	11.8325	30.162	23.6876	18.0904
	5826.08	3071.99	5381.75	3920.96	3049.46		4575.16	2376.91	4188.23	3015.64	2557.18		21.4711	22.6263	22.1773	23.0892	16.1432
	3929.7	11237.9	362.576	3772.94	5964.95		2887.7	9738.59	331.352	2920.23	5171.03		26.5162	13.3417	8.61171	22.6008	13.3098
	3343.68	21426.5	906.1	13688.7	4304.11		1947.12	18024.2	694.817	11938.2	3194.03		41.7674	15.8789	23.3178	12.7879	25.7912
	3172.39	11777.8	710.028	5781.76	6384.83		2070.74	9845.26	447.204	4119.96	5668.34		34.7262	16.4085	37.016	28.7421	11.2218
	3936.66	12875.4	962.885	10238.5	4494.75		2283.73	10495.9	675.651	7938.64	4279.37		41.9881	18.481	29.8306	22.463	4.79177
	1436.64	2836.14	1304.92	6028.57	8484.22		1048.98	1924.46	1144.29	4395.34	7483.09		26.9842	32.145	12.3097	27.0914	11.7999
	8219.01	1366.32	619.127	8192.09	6089.98		6705.65	870.887	541.259	5933.45	5202.55		18.413	36.2604	12.5771	27.571	14.5721
	4351.54	3473.82	798.559	5948.08	5726.26		3285.43	2500.52	668.245	4515.67	4675.66		24.4995	28.0182	16.3186	24.0819	18.347
	7214.84	2230.83	989.736	6788.13	5859.07		5884.49	1548.94	738.447	5080.7	4619.94		18.4392	30.5666	25.3895	25.1532	21.1489
	4538.5	3805.72	560.286	5977.7	785.854		3807.37	3038.15	415.928	4223.02	468.127		16.1095	20.1687	25.7651	29.3538	40.4308
	11590.5	7724.77	1256.06	4618.6	840.935		10450.7	7017.4	797.828	3070.93	522.18		9.83381	9.15729	36.4818	33.5095	37.9048
	8428.77	5200.73	2856.21	3307.98	2837.01		7083.03	4472.93	1692.5	2181.22	2779.69		15.9661	13.9942	40.7433	34.0618	2.02061
	1507.86	2361.3	3858.6	8815.65	2112.71		1202.41	1779.41	2931.48	6594.62	2089.02		20.2568	24.6429	24.0272	25.1942	1.12164
	1035.56	8012.62	1688.25	2733.63	1110.32		728.079	5993.18	1329.87	2198.26	1072.2		29.6923	25.2033	21.2277	19.5846	3.43289
	610.52	4053.49	1256.39	3268.74	2862.34		432.202	3407.54	816.14	2490.81	2819.71		29.2076	15.9355	35.041	23.7991	1.48955
	918.21	1585.13	1108.43	2781.79	9871.24		596.476	1463.84	546.852	2308.73	8621.03		35.0393	7.65161	50.6642	17.0056	12.6651
	2300.42	1437.15	4342.53	2628.29	15152.1		1688.79	1263.29	3142.23	1868.13	12922.1		26.5879	12.0974	27.6407	28.9221	14.7174
	5415.48	4043.26	3588.21	4144.87	3755.13		4578.28	3079.14	2521.65	3361.3	3346.65		15.4595	23.8452	29.7239	18.9047	10.8781
	5612.64	4954.55	3462.86	4440.44	6302.59		4511.91	3874.57	2692.04	3887.35	5337.43		19.6116	21.7976	22.2596	12.4558	15.3138
	2756.3	3209.08	5251.75	4476.33	1143.69		1842.29	2130.35	4452.69	3657.26	613.36		33.1608	33.6151	15.2152	18.2978	46.3703
	3033.61	6471.73	2478.37	5571.1	1510.94		2359.78	5767	1982.66	4789.42	1101.51		22.2119	10.8894	20.0015	14.0309	27.0976
	3033.38	8339.42	2408.22	9350.05	2172.56		2394.04	6470.32	1717.62	7962.47	1764.13		21.0768	22.4129	28.6768	14.8403	18.7997
	2607.83	14594	4344.88	2111.28	1642.54		2277.63	12510.9	3783.55	1926.19	1312.38		12.6619	14.2738	12.9194	8.76694	20.101
	2339.87	11875.9	6829.62	3170.12	1965.01		1637.02	10005.4	6063.1	2707.08	1628.81		30.038	15.7501	11.2234	14.6065	17.1091
	1878.59	2394.86	3653.15	2987.99	2914.9		1324.4	1746.39	2885.87	2275.51	2270.87		29.5003	27.0775	21.0033	23.845	22.0943
	1088.63	2710.58	1838.7	3949.39	1779.36		717.276	2160.19	1600.12	2649.55	1430.39		34.1123	20.3052	12.9758	32.9126	19.612
	3254.4	25198.1	2832.6	13355.6			2193.45	22396.8	2474.78	10969.8			32.6004	11.1171	12.6322	17.8637
	2312.39	22973.5	1172.83	13552			1570.27	19034	1079.38	11451.8			32.0933	17.1482	7.9675	15.497
	3175.79	9042.43	7652.36	14624.1			1864.12	6830.77	6605.81	11736.4			41.302	24.4587	13.6762	19.7459
	2568.49	11693.1	10118.2	10423.3			1959.12	8729.18	7924.44	8631.28			23.7248	25.3474	21.6814	17.1926
	7055.48		9061.51	6271.63			5278.9		7588.36	5247.01			25.1802		16.2572	16.3373
	2916.1		2298.35	10366.4			2517.02		1503.66	8230.09			13.6854		34.5766	20.6083
	1112.96		6381.68	13141.6			866.008		5153.9	10882.1			22.1886		19.2392	17.1939
	1232.54						928.699						24.6516
	1056.56						748.797						29.1286
	404.15						260.262						35.6026
	300.825						185.182						38.442
	648.068						430.739						33.5349
	1687.03						1352.26						19.8437
	366.096						273.592						25.2677
	695.653						557.446						19.8672
	3036.72						2291.74						24.5324
Experiment 2	3221.25	5919.21	2664.38	2640.84	805.117		2641.33	4783.23	2324.99	2316.4	782.753		18.0029	19.1914	12.7378	12.2853	2.77773
	3573.64	5178.26	2102.33	2012.71	1578.28		2966.21	4448.75	1815.03	1751.89	1521.34		16.9975	14.0881	13.6659	12.9588	3.60766
	1713.92	5010.98	1533.82	1831.89	869.981		1289.47	4096.52	1252.1	1627.8	732.233		24.7646	18.2492	18.3674	11.1407	15.8334
	1186.07	3227.12	1636.58	3506.85	818.145		897.246	2686.37	1317.8	3281.07	803.802		24.351	16.7565	19.4786	6.43829	1.75311
	4897.88	3014.11	725.772	1158.63	722.059		3929.04	2230.43	630.419	975.169	691.675		19.7807	26.0006	13.1381	15.8343	4.20797
	5273.33	2936.83	1404.55	3526.89	1152.66		4167.55	2235.11	1264.31	3054.87	1076.88		20.9694	23.8939	9.98471	13.3833	6.57438
	3371.57	1529.63	553.557	1657.55	545.08		2510.73	1004.54	488.311	1576.19	461.905		25.5325	34.3275	11.7867	4.90845	15.2592
	4495.99	2095.49	890.042	1147.61	900.736		3460.15	1587.73	794.826	900.174	863.042		23.0392	24.2309	10.6979	21.5608	4.1848
	5055.1	3992.43	2899.78	1678.78	1174.8		4105.78	2903.15	2304.53	1518.89	1123.31		18.7796	27.2836	20.5274	9.52406	4.38246
	4556.02	2171.28	2620.35	1144.65	1227.05		3483.72	1432.11	2301.5	1088.25	1192.4		23.5358	34.0431	12.1683	4.9271	2.82377
	4054.21	3836.96	2252.7	1726.95	513.868		3045.4	2901.13	1890.31	1538.87	478.922		24.883	24.3899	16.087	10.8913	6.80058
	3054.5	2644.19	4690.71	2473.78	703.706		2402.68	1952.08	3846.42	2267.26	638.248		21.3396	26.1748	17.9991	8.34817	9.3019
	5867.24	3775.87	2556.54	3540.13	985.279		4792.08	3069.82	2041.78	3071.83	930.441		18.3249	18.699	20.1353	13.2284	5.56573
	1591.46	3749.42	2887.23	2782.96	817.773		1278.61	2808.83	2323.18	2091.96	702.405		19.658	25.0863	19.536	24.8299	14.1076
	5152.15	4571.72	2746.54	7149.05	734.217		4016.53	3761.26	2244.38	6322.04	693.373		22.0417	17.7276	18.2836	11.568	5.56293
	3930.52	4956.66			773.057		3183.16	3671			702.952		19.0143	25.9381			9.06854
	3685.16	5899.96			949.049		2787.96	4411.9			894.222		24.3464	25.2215			5.77705
		3640.97			969.26			2654.78			914.231			27.086			5.67742
					1923.42						1857.29						3.43851
					1093.9						1019.97						6.75872
					2148.36						1960.92						8.72477
					1454.22						1204.54						17.1696
					1358.46						1155.33						14.953
					1194.86						1000.4						16.275
					1601.74						1447.33						9.63973
Experiment 3	2596.3	1716.22		1302.31			1866.12	987.252		1130.88			28.1237	42.4751		13.1636
	1629.32	3261.18		1834.54			1003.04	2574.24		1577.86			38.4382	21.064		13.9917
	2141.66	1423.7		745.834			1733.45	1098.91		615.757			19.0606	22.8127		17.4405
	280.513	2597.59		928.723			194.251	2084.86		763.519			30.7515	19.7388		17.7883
	2270.53	1891.03		804.576			1785.43	1358.22		600.119			21.3649	28.1759		25.4118
	1222.22	1832.84		1664.93			994.286	1523		1312.59			18.6492	16.9053		21.1628
	667.497	2186.95		1891.12			385.595	1801.38		1658.93			42.2327	17.6306		12.2778
	309.698	15074.3		1082.69			123.234	11132.9		1018.3			60.2083	26.1464		5.94685
	1650.53	1329.15		1245.76			1024.87	1175.49		1026.22			37.9064	11.5609		17.6232
	1603.2	953.389		3149.94			1351.03	711.832		2572.06			15.7295	25.3367		18.3458
	1424.64	678.17		3264.03			1123.8	602.485		2892.66			21.1168	11.1602		11.3776
	1409.28	1415.48		1364.56			1010.62	1146.66		978.893			28.2879	18.9915		28.2632
	2037.82			1447.61			1581.09			1020.97			22.4126			29.4721
	1000.69			2157.7			839.172			1705.62			16.141			20.952
	926.675			1699.22			714.272			1299.12			22.921			23.5459
	1031.17						858.915						16.7051
	1461.8						1044.63						28.5386
