# Supplementary material for: Lipid kinases VPS34 and PIKfyve coordinate a phosphoinositide cascade to regulate retriever-mediated recycling on endosomes
Source: eLife journal article supplement (doi:10.7554/elife.69709), 2022-01-18
Supplement: fig2-data1 [file Figure 2L.xlsx]

## Sheet: Sheet1
Effect of apilimod on diplacement of b1-integrin from the cell surface to internal compartments
	DMSO		apilimod			average		DMSO		apilimod
	15 mins	30 mins	15 mins	30 mins		DMSO 30 mins		15 mins	30 mins	15 mins	30 mins
Experiment 1	1601.81	1606.27	1704.82	1084.47		1079.27		1.48416	1.48829	1.57961	1.00482
	1552.53	1082.48	1644.9	2574.43				1.4385	1.00298	1.52409	2.38535
	352.836	633.049	1594.24	2183.05				0.326922	0.586554	1.47715	2.02272
	18.661	759.756	2845.06	1701				0.0172904	0.703955	2.6361	1.57607
	1314.73	2308.77	1265.38	2463.23				1.21817	2.1392	1.17245	2.28232
	322.135	3161.45	1692.46	3118.74				0.298476	2.92925	1.56816	2.88968
	42.218	443.406	897.911	2888.52				0.0391173	0.41084	0.831963	2.67637
	29.778	3484.36	2513.6	520.316				0.0275909	3.22845	2.32899	0.482101
	150.631	3258.24	1063.25	873.204				0.139568	3.01893	0.985156	0.809071
	15.56	3451.5	304.38	645.193				0.0144172	3.198	0.282025	0.597806
	42.689	3819.38	2613.16	833.198				0.0395537	3.53886	2.42124	0.772003
	14.654	1623.48	225.728	3120.05				0.0135777	1.50424	0.209149	2.89089
	258.624	2794.9	533.209	3611.47				0.239629	2.58962	0.494047	3.34623
	233.691	3725.22	1347.62	5143.91				0.216527	3.45162	1.24865	4.76612
	391.482	2024.81	2852.54	6756.78				0.362729	1.87609	2.64303	6.26053
	553.142	1089.56	1046.75	2231.96				0.512516	1.00953	0.969868	2.06803
	1167.34	1639.13	1735.07	5229.24				1.0816	1.51874	1.60763	4.84517
	916.189	3269.37	2958	3300.8				0.848899	3.02925	2.74075	3.05837
	955.776	3203.66	540.249	5318.66				0.885578	2.96837	0.50057	4.92803
	692.221	2583.3	168.856	517.632				0.64138	2.39357	0.156454	0.479614
	229.753	1160.18	390.071	2485.06				0.212879	1.07497	0.361422	2.30255
	849.629	2101.74	924.169	4997.94				0.787227	1.94737	0.856293	4.63086
	24.428	579.801	723.845	1433.49				0.0226339	0.537217	0.670682	1.32821
	91.528	2066.57	2740.2	4509.12				0.0848057	1.91479	2.53895	4.17795
	463.496	1809.74	3630.19	3981.63				0.429454	1.67683	3.36356	3.6892
	674.971	1674.72	2087.34	4520.27				0.625397	1.55172	1.93404	4.18828
	418.176	1524.03	1435.74	4941.94				0.387463	1.41209	1.33029	4.57897
	614.492	986.39	1463.62	1741.76				0.56936	0.913944	1.35612	1.61383
	385.21	1261.88	300.303	1913.7				0.356918	1.1692	0.278247	1.77314
	204.436	732.261	309.694	2177.7				0.189421	0.67848	0.286948	2.01776
	405.265	363.534	298.525	2782.63				0.3755	0.336834	0.2766	2.57826
	610.554	1549.24	219.473	7335.02				0.565711	1.43545	0.203354	6.79629
	219.943	468.828	1238.41	3006.79				0.203789	0.434395	1.14746	2.78595
	85.343	5.036	825.079	5473.45				0.0790749	0.00466613	0.76448	5.07145
	526.135	19.445	413.628	6679.09				0.487493	0.0180168	0.383249	6.18854
	523.8	499.581	504.756	4876				0.485329	0.462889	0.467684	4.51788
	268.818	10.559	400.334	1174.81				0.249074	0.00978349	0.370931	1.08853
	295.929	13.835	1002.42	2729.45				0.274194	0.0128189	0.928797	2.52899
	82.659	56.802	432.29	5407.03				0.0765881	0.0526301	0.40054	5.00991
	234.998	577.397	358.987	4161.03				0.217738	0.53499	0.332621	3.85542
	618.047	21.571	487.872	5000.79				0.572654	0.0199867	0.45204	4.63351
	191.96	57.22	44.03	3799.76				0.177861	0.0530174	0.0407962	3.52068
	131.987	16.588	83.025	61.942				0.122293	0.0153697	0.0769272	0.0573926
	0	38.263	12.127	7.701				0	0.0354527	0.0112363	0.00713539
	235.573	38.263	0	634.931				0.218271	0.0354527	0	0.588298
	765.593	149.08	633.467	58.109				0.709363	0.138131	0.586942	0.0538411
	1002.04	270.211	76.056	94.665				0.928442	0.250365	0.07047	0.0877123
	81.178	50.582	162.427	135.053				0.0752158	0.046867	0.150497	0.125134
	530.003	193.546	48.125	6.656				0.491077	0.179331	0.0445904	0.00616715
	8.067	86.911	1.411	97.348				0.00747451	0.0805278	0.00130737	0.0901982
	1292.11	945.548	26.816	30.422				1.19721	0.876102	0.0248465	0.0281876
	92.399	73.233	62.378	17.11				0.0856127	0.0678544	0.0577966	0.0158533
	25.3	62.221	81.736	15.612				0.0234418	0.0576511	0.0757328	0.0144654
	55.286	4.077	10.698	288.28				0.0512255	0.00377756	0.00991228	0.267107
	32.827	1088.65	20.874	75.254				0.030416	1.0087	0.0193409	0.0697269
	3.014	546.26	139.409	29.237				0.00279263	0.50614	0.12917	0.0270897
	3.328	661.886	5.401	16.117				0.00308357	0.613273	0.00500432	0.0149333
	2.457	2160.16	211.858	22.25				0.00227654	2.0015	0.196298	0.0206158
	206.701	1428.26	151.937	83.67				0.19152	1.32336	0.140778	0.0775248
	120.417	254.164	21.222	2.474				0.111573	0.235497	0.0196633	0.0022923
	86.545	2139.18	152.129	12.772				0.0801886	1.98207	0.140956	0.011834
	6.412	2.648	56.837	326.508				0.00594107	0.00245352	0.0526626	0.302527
	34.064	450.323	122.613	400.316				0.0315621	0.417249	0.113608	0.370915
	1.411	25.474	0	302.341				0.00130737	0.023603	0	0.280135
	13.765	200.812	8.817	1.498				0.012754	0.186063	0.00816943	0.00138798
	26.728	104.387	10.28	68.825				0.0247649	0.0967202	0.00952498	0.0637701
	22.895	83.147	64.138	573.581				0.0212135	0.0770402	0.0594273	0.531454
	11.622	523.992	125.557	254.164				0.0107684	0.485507	0.116335	0.235497
	238.082	441.611	85.064	77.502				0.220596	0.409177	0.0788164	0.0718098
	735.363	6.813	11.831	1606.27				0.681354	0.00631261	0.0109621	1.48829
	627.839		50.164	427.411				0.581727		0.0464797	0.396019
	744.284		57.917	691.576				0.68962		0.0536632	0.640783
	32.095		449.191	1043.09				0.0297378		0.4162	0.966478
	2267.04		71.438	523.678				2.10053		0.0661912	0.485216
	193.354		289.326	953.145				0.179153		0.268076	0.883141
	11.552		133.869	35.719				0.0107036		0.124037	0.0330956
	197.292		373.78	70.689				0.182802		0.346327	0.0654972
	6.569		41.713	294.762				0.00608654		0.0386494	0.273113
	96.041		12.754	721.179				0.0889872		0.0118173	0.668211
	966.248		181.715	220.954				0.895281		0.168369	0.204726
	90.274		1.411					0.0836438		0.00130737
	110.538		16.413					0.102419		0.0152075
	384.931		127.3					0.356659		0.11795
	69.748		132.649					0.0646253		0.122907
	157.304		233.377					0.145751		0.216236
	219.664		18.347					0.203531		0.0169995
	51.732		3.189					0.0479325		0.00295478
	149.846		369.894					0.13884		0.342727
	631.237		69.348					0.584875		0.0642547
	631.237		43.943					0.584875		0.0407156
	313.649		59.799					0.290613		0.055407
	248.031		155.161					0.229814		0.143765
	1036.55		324.348					0.960424		0.300526
	424.727		294.814					0.393533		0.273161
	306.262		75.864					0.283768		0.0702921
	354.77		19.933					0.328714		0.018469
	92.783		1500.61					0.0859685		1.39039
	8.398		157.565					0.0077812		0.145993
	193.215		19.707					0.179024		0.0182596
	116.41		19.707					0.10786		0.0182596
	250.034		294.884					0.23167		0.273226
	1.15		381.621					0.00106554		0.353593
	8.398		31.834					0.0077812		0.0294959
	0		38.002					0		0.0352109
	18.086		265.681					0.0167577		0.246168
	592.172		68.302					0.54868		0.0632855
	353.341		198.494					0.32739		0.183915
	518.939		53.352					0.480825		0.0494335
	31.781		169.536					0.0294468		0.157084
	46.888		70.323					0.0434443		0.0651581
	163.524		50.861					0.151514		0.0471255
	325.637		15.473					0.30172		0.0143366
	299.17		73.825					0.277197		0.0684029
	258.015		95.031					0.239065		0.0880514
			252.892							0.234318
			411.259							0.381054
			876.41							0.812041
			809.955							0.750467
			472.556							0.437849
			233.151							0.216027
			157.809							0.146219
			74.453							0.0689847
Experiment 2	366.403	1055.18	551.551	1536.49		622.55		0.588552	1.69493	0.885954	2.46806
	440.263	992.191	302.187	918.984				0.707193	1.59375	0.485402	1.47616
	363.04	602.284	461.11	1778.44				0.58315	0.967446	0.740679	2.8567
	382.317	469.873	537.664	205.465				0.614114	0.754755	0.863648	0.330038
	227.415	1285.94	796.025	1775.71				0.365296	2.0656	1.27865	2.85232
	758.087	393.159	428.646	1838.13				1.21771	0.63153	0.688532	2.95257
	315.087	473.766	439.658	1617.66				0.506123	0.761008	0.706221	2.59844
	305.2	1593.72	257.056	1382.89				0.490242	2.55998	0.412908	2.22134
	339.329	245.651	579.602	540.762				0.545063	0.394588	0.931012	0.868624
	393.106	855.934	241.09	1678.4				0.631445	1.37488	0.387262	2.696
	347.933	372.1	140.134	2591.27				0.558883	0.597703	0.225097	4.16235
	484.651	491.207	627.172	1856.37				0.778493	0.789024	1.00742	2.98189
	371.4	572.048	1233.81	800.396				0.596578	0.918878	1.98186	1.28567
	472.843	1478.77	1311.75	574.859				0.759526	2.37534	2.10706	0.923394
	527.384	211.204	1278.43	1123.21				0.847135	0.339256	2.05353	1.8042
	248.442	281.33	303.428	1131.91				0.399071	0.451899	0.487395	1.81818
	133.175	617.157	179.052	468.833				0.213918	0.991337	0.287611	0.753085
	186.283	553.907	166.699	489.404				0.299226	0.889739	0.267768	0.786128
	108.901	804.438	71.186	765.312				0.174927	1.29217	0.114346	1.22932
	268.302	671.454	187.416	899.06				0.430972	1.07855	0.301046	1.44416
	540.603	626.801	188.755	590.009				0.868368	1.00683	0.303196	0.947729
	589.967	140.453	72.162	958.163				0.947662	0.225609	0.115914	1.53909
	341.918	583.092	301.911	653.398				0.549222	0.936618	0.484958	1.04955
	311.459	311.341	134.745	912.756				0.500295	0.500106	0.21644	1.46616
	419.788	251.826	401.381	1248.89				0.674304	0.404507	0.644737	2.00609
	99.894	1002.67	241.97	1327.66				0.160459	1.61058	0.388675	2.13262
	304.712	385.807	579.273	170.826				0.489458	0.61972	0.930484	0.274397
	199.375	350.734	210.133	487.346				0.320255	0.563383	0.337536	0.782822
	152.738	575.549	1115.65	526.249				0.245342	0.924502	1.79207	0.845312
	385.602	1123.62	1508.66	361.258				0.619391	1.80487	2.42336	0.580287
	212.997	414.166	564.112	1131.78				0.342136	0.665273	0.906131	1.81797
	159.549	489.892	281.818	1438.78				0.256283	0.786912	0.452683	2.31111
	272.322	688.514	186.177	524.276				0.43743	1.10596	0.299055	0.842142
	306.473	673.014		749.675				0.492286	1.08106		1.2042
	301.327	135.435		650.151				0.48402	0.217549		1.04433
	323.532	637.59		336.942				0.519688	1.02416		0.541229
				1438.99							2.31145
				581.055							0.933346
Experiment 3	16162.5	16604.7	7091.29	20080.5		14079.5		1.14794	1.17935	0.503659	1.42622
	14799.1	13059.7	8075.47	25287.8				1.05111	0.927569	0.57356	1.79607
	6546.09	11799.1	7893.45	24698.3				0.464937	0.838033	0.560632	1.7542
	12561.9	11207.1	8093.14	24134.9				0.892209	0.795987	0.574816	1.71418
	11499.7	11902.5	7815.14	17211				0.81677	0.845372	0.555071	1.22241
	12472.5	32182	8561.94	9615.92				0.885859	2.28573	0.608112	0.682971
	6122.79	11096.3	9756.05	11895.4				0.434872	0.788118	0.692924	0.844874
	12187.4	14314.8	10155.1	13596.9				0.865608	1.01671	0.721263	0.965723
	10982.5	9054.42	10766.6	11655.4				0.780031	0.643091	0.764695	0.827825
	12081	19560	7155.96	11977.9				0.858056	1.38925	0.508253	0.850734
	9218.55	11733.9	6843.25	7714.26				0.654748	0.833403	0.486042	0.547906
	8703.05	26698.1	9601.85	8602.96				0.618135	1.89623	0.681972	0.611025
	11719.9	17307.9	7885.96	16860				0.832409	1.2293	0.5601	1.19748
	8170.7	15359.8	10277.5	9977.64				0.580324	1.09093	0.729957	0.708662
	8021.23	11362.3	9969.09	14919				0.569708	0.807008	0.708055	1.05962
	16563.5	13081.1	10211.6	17307.9				1.17642	0.929085	0.725278	1.22929
	14276.4	9539.31	9818.59	13663.3				1.01398	0.67753	0.697366	0.970437
	15795.9	11972.3	13546.3	13961.1				1.1219	0.850334	0.962128	0.991584
	7627.15	11592.7	17670.9	14211.2				0.541719	0.823375	1.25508	1.00935
	15136.3	13075.2	16117.9	17277.9				1.07505	0.928669	1.14477	1.22717
	16145.1	10680.1	15221.8	11739.4				1.1467	0.758556	1.08113	0.833789
	17175.9	11895.2	21147.9	11785.8				1.21992	0.84486	1.50203	0.837089
	11849.1	10358.8	16652.4	10522.3				0.841582	0.735733	1.18274	0.747344
	17812.7	12471.4	10101.9	11480				1.26515	0.885785	0.717487	0.81537
	13207.8		14176.7	12862.9				0.938085		1.0069	0.913591
	21709.1		11886.4	11954.2				1.54189		0.84423	0.849051
			16418.6	10828.6						1.16613	0.769102
			26094.5	8951.11						1.85336	0.635753
				8598.63							0.610718
				11781.4							0.836771
Experiment 4	650.947	742.704	176.502	323.596		278.13		2.34044	2.67035	0.634603	1.16347
	997.745	57.034	371.93	40.548				3.58734	0.205063	1.33725	0.145788
	859.011	371.198	339.562	571.051				3.08853	1.33462	1.22088	2.05318
	1036.73	317.517	1269.13	426.206				3.72752	1.14162	4.5631	1.5324
	1110.42	299.938	877.364	473.84				3.99247	1.07841	3.15452	1.70367
	1328.56	491.568	249.163	1540.37				4.77675	1.76741	0.895852	5.53833
	1167.86	186.549	556.591	158.117				4.19898	0.670727	2.00119	0.568501
	30.904	172.036	515.937	371.962				0.111114	0.618546	1.85502	1.33737
	139.848	232.061	214.503	699.579				0.502816	0.834363	0.771234	2.5153
	52.027	401.339	615.004	1210.24				0.18706	1.44299	2.21121	4.35136
	128.995	193.933	39.741	388.374				0.463795	0.697276	0.142887	1.39638
	73.86	125.282	70.157	369.798				0.26556	0.450445	0.252246	1.32959
	46.574	206.419	4.742	424.954				0.167454	0.742168	0.0170496	1.5279
	82.039	146.001	86.973	490.91				0.294967	0.524939	0.312707	1.76504
	104.997	637.612	56.705	24.199				0.377511	2.2925	0.20388	0.0870062
	98.993	431.861	145.014	379.261				0.355924	1.55273	0.52139	1.36361
	55.528	3.925	24.273	77.265				0.199648	0.0141121	0.0872723	0.277802
	65.776	191.111	25.844	23.212				0.236494	0.687129	0.0929207	0.0834575
	308.107	22.862	313.857	17.834				1.10778	0.0821991	1.12846	0.0641212
	613.041	461.863	76.321	18.163				2.20416	1.6606	0.274408	0.0653041
	285.064	431.288	9.431	175.781				1.02493	1.55067	0.0339087	0.632011
	283.441	412.372	50.605	26.533				1.0191	1.48266	0.181948	0.095398
	217.665	240.729	60.344	786.265				0.782603	0.865528	0.216964	2.82697
	119.298	372.949	66.508	221.845				0.42893	1.34092	0.239126	0.797632
	6.068	776.006	39.381	197.253				0.0218172	2.79009	0.141592	0.709213
	8.317	7.182	175.324					0.0299033	0.0258225	0.630368
	5.888	22.703	142.405					0.02117	0.0816274	0.51201
	40.643	31.477	164.291					0.14613	0.113174	0.590699
	36.049	192.797						0.129612	0.693191
	20.04	296.797						0.0720527	1.06712
	28.305	369.84						0.101769	1.32974
		53.194							0.191256
