# Supplementary material for: Lipid kinases VPS34 and PIKfyve coordinate a phosphoinositide cascade to regulate retriever-mediated recycling on endosomes
Source: eLife journal article supplement (doi:10.7554/elife.69709), 2022-01-18
Supplement: fig5-data1 [file Figure 5B.xlsx]

## Sheet: Sheet1
Quantification of the colocalization of internalized integrin with endocytic markers. Mander's colocalization analysis was performed.
	Colocalization of internalized integrin pool with EEA1							Colocalization of internalized integrin pool with Lamp1							Colocalization of internalized integrin pool with Rab11							Colocalization of internalized integrin pool with Rab4
		DMSO		Apilimod					DMSO		Apilimod					DMSO		Apilimod					DMSO		Apilimod
	0 mins	15 mins	30 mins	15 mins	30 mins			0 mins	15 mins	30 mins	15 mins	30 mins			0 mins	15 mins	30 mins	15 mins	30 mins			0 mins	15 mins	30 mins	15 mins	30 mins
Experiment 1	0.579452	0.007042	0.072351	0.345	0.435762		Experiment 1	0.054842	0.074564	0.176895	0.297578	0.166856		Experiment 1	0.055729	0.031165	0.054545	0.108375	0.015987		Experiment 1	0.047992	0.149728	0.355976	0.070218	0.028227
	0.343532	0.086145	0.098377	0.210008	0.598901			0.03056	0.020729	0.107784	0.345154	0.037937			0.123904	0.012378	0.125884	0.249063	0.073948			0.14061	0.036134	0.016667	0.166874	0.190527
	0.474542	0.269631	0.073561	0.375275	0.558416			0.064784	0.121951	0.174947	0.282735	0.248055			0.083859	0.035514	0.029898	0.065693	0.145914			0.112367	0.095815	0.072438	0.346641	0.121044
	0.343822	0.204175	0.131148	0.25717	0.488312			0.088304	0.228528	0.086396	0.016064	0.185678			0.062954	0.008885	0.103936	0.270695	0.040831			0.188755	0.119537	0.173127	0.035857	0.074336
	0.457184	0.42607	0.062232	0.204545	0.550152			0.123016	0.255951	0.141663	0.118967	0.177868			0.255814	0.0052	0.03115	0.387383	0.133333			0.172297	0.092593	0.208711	0.275758	0.092941
	0.265908	0.211276	0.113249	0.365444	0.722169			0.444444	0.095533	0.343182	0.047619	0.171243			0.13138	0.07993	0.037618	0.2587	0.062958			0.207534	0.01312	0	0.149227	0.024876
	0.681034	0.035088	0.080844	0.399155	0.57529			0.087963	0.165932	0.176667	0.303595	0.170673			0.101988	0.006422	0.041971	0.2844	0.132112			0.056162	0.132835	0.272308	0.137462	0.152108
	0.75	0.23213	0.036364	0.548757	0.486026			0.245647	0.18766	0.138632	0.33838	0.110034			0.189173	0.041075	0.004306	0.186848	0.030673			0.071958	0	0.133447	0.161127	0.003788
	0.204405	0.107733	0.110795	0.307033	0.625641			0.071088	0.130818	0.127136	0.17801	0.212833			0.084735	0.009524	0.091499	0.224133	0.082778			0.123162	0.064	0.153385	0.010526	0.081633
	0.570198	0.027833	0.002299	0.25656	0.651408			0.250163	0.136017	0.132879	0.224576	0.196635			0.234094	0.13009	0.08099	0.412174	0.007498			0.182965	0.24513	0.157968	0.25	0.004556
	0.654795	0.491337	0.061148	0.239189	0.254562			0.174396	0.189091	0.027228	0.102071	0.047333			0.138516	0.090772	0.091954	0.210012	0.040085			0.171179	0.101231	0.377475	0	0.015015
	0.636364	0.531183	0.05698	0.315368	0.665118			0.147086	0.033748	0.170915	0.208151	0.06483			0.088106	0.174286	0.150562	0.207536	0.081573			0.183673	0.052334	0.099794	0	0.191304
	0.275424	0.437879	0.066449	0.458586	0.470038			0.093371	0.228224	0.092464	0.20817	0.057643			0.083304	0.040707	0.192308	0.122435	0.020171			0.158333	0.268775	0.129009	0.066253	0.156716
	0.298328	0.420653	0.084541	0.341014	0.557963			0.089177	0.055688	0.083984	0.264557	0.056988			0.183316	0.102135	0.035874	0.103283	0.103283			0.119444	0.287971	0.069767	0.240541	0.046049
	0.570326	0.28351	0.105601	0.125984	0.424587			0.106357	0.119241	0.115419	0.019002	0.169928			0.022026	0.018657	0.25788	0.251313	0.295309			0.098827	0.042532	0.10939	0.080727	0.124302
	0.144205	0.404569	0.07026	0.333557	0.383147			0.238873	0.113971	0.080803	0.262423	0.167462			0.093914	0.11312	0.049123	0.286341	0.232277			0.226573	0.037037	0.327479	0.18899	0.024142
	0.393328	0.474238	0.456262	0.162701	0.352335			0.143704	0.020636	0.075537	0.159132	0.160165			0.101983	0.182407	0.025727	0.210485	0.048867			0.086743	0.292279	0.066735	0.144541	0.092493
	0.180451	0.110163	0.177474	0.217955	0.331828			0.112554	0.115593	0.015314	0.205058	0.122426			0.012404	0.069235	0.048193	0.165367	0.078181			0.147192	0.040816	0.104119	0.069256	0.188722
	0.657812	0.238328	0.275304	0.176033	0.437548			0.184615	0.144882	0.089016	0.21473	0.207378			0.012903	0.110863	0.076041	0.240685	0.176578			0.168546	0.024259	0.071599	0.075	0.02439
	0.335404	0.118497	0.185106	0.401869	0.334112			0.110124	0.139779	0.127404	0.133746	0.185062			0.17866	0.069279	0.052371		0.067147			0.129191	0.136076	0.032609	0.270356	0.362963
	0.686934	0.414231	0.180514	0.350043	0.494352			0.174814	0.133634	0.032724	0.065818	0.283088			0.17803	0.015172	0.051533		0.111166			0.231546	0.169369	0.078684	0.258865	0.256684
	0.665428	0.229084	0.190438	0.190173	0.490007			0.218143	0.254723	0.063174	0.174483	0.271168			0.283851	0.063405	0.14966		0.046693			0.096096	0.068598	0.00703	0.333773	0.021739
	0.305031	0.326007	0.280162	0.147014	0.188302			0.21034	0.171875	0.100038	0.060501	0.230375				0.003009			0.058148				0.020915	0	0.022609	0.121795
	0.793883	0.057953	0.258813	0.199314	0.458171			0.141808	0.170179	0.125339	0.156405	0.195658				0.023758			0.153959				0.108247	0.081742	0.246127	0.157583
	0.586681	0.362986	0.101099	0.246296				0.227596	0.295814	0.069174	0.09939	0.057916				0.045595								0	0.351211	0.213675
	0.659869	0.340502	0.508434	0.315895				0.280854	0.028067	0.05506	0.233374	0.314037				0.096411									0.1	0.155172
	0.591216	0.187296	0.19685	0.188397					0.168601	0.21857		0.325912				0.016207									0.191379	0.419948
	0.599024	0.214286		0.282149						0.142857		0.224228		Experiment 2	0.334439	0.051268	0	0.052133	0.024513		Experiment 2	0.114286	0.174603	0.014169	0.109489	0
	0.712446			0.418182								0.230034			0.25	0.047855	0.00398	0.096609	0.087866			0.125	0.037037	0.045775	0.116883	0.301743
	0.800664			0.315483								0.210003			0.082192	0.158696	0.007519	0.069948	0.030728			0.294258	0.02981	0.091398	0.11245	0.003367
	0.666412											0.206514			0.074655	0.096933	0.025688	0.078652	0.072256			0.224287	0.024457	0.000909	0.196532	0.370614
	0.763231											0.14254			0.117253	0.06592	0	0.20133	0.130616			0.326633	0.1174	0.045027	0.188119	0.084337
Experiment 2	0.763231	0.184211	0.369863	0.065515	0.623158							0.243019			0.096688	0.022222	0.037736	0.107776	0.234607			0.159389	0.275992	0.026667	0.005917	0.244845
	0.438776	0.161417	0.286885	0.235772	0.570686							0.274434			0.126232	0.029412	0.020472	0.080114	0.096919			0.297968	0.080972	0.096074	0.429194	0.27972
	0.309942	0.233175	0.583424	0.442062	0.31136		Experiment 2	0.1	0.020253	0.344828	0.143177	0.245652			0.223485	0.038462	0.035398	0.099588	0.184564			0.420696	0.32363	0.010943	0.10473	0.16
	0.116	0.292398	0.414989	0.172557	0.525738			0.285714	0.150115	0.384441	0.135714	0.256303			0.160279	0.067647	0.104693	0.124478	0.009362			0.177778	0.20973	0.002309	0.123853	0.146604
	0.389231	0.217557	0.50564	0.363771	0.425309			0.192246	0.056434	0.310014	0.442486	0.273795			0.126916	0.05814	0.062315	0.096115	0.022673			0.346228	0.037313	0.208009	0.326984	0.09833
	0.27122	0.263158	0.76235	0.369318	0.06015			0.466667	0.015829	0.337147	0.366038	0.170819			0.543974	0.025568	0.206061	0.025219	0.079914			0.117942	0.122449	0.118687	0.278325	0.182533
	0.432513	0.152416	0.571726	0.670022	0.33			0.112	0.266414	0.358418	0.276088	0.246269			0.092715	0.049828	0.06	0.092769	0.094606			0.15035	0.160448	0.056273	0.110329	0.093717
	0.338208	0.263554	0.532917	0.174897	0.528409			0.167939	0.079197	0.303387	0.372702	0.396487			0.244186	0.143251	0.048077	0.016349	0.088279			0.264	0.147708	0.032598	0.082759	0.042639
	0.534016	0.364985	0.339989	0.292776	0.574581			0.36921	0.156471	0.381546	0.263487	0.298711			0.385486	0.08655	0.073992	0.135475	0.061983			0.224779	0.062069	0.180751	0.255882	0.059179
	0.643529	0.254545	0.609096	0.248926	0.282227			0.454545	0.167748	0.356941	0.136608	0.306667			0.0661	0.085345	0.005671	0.015625	0.043162			0.476	0.018692	0.258446	0.039788	0.051887
	0.646456	0.388815	0.170455	0.387825	0.616778			0.448087	0.103336	0.440912	0.228694	0.153333			0.072414	0	0.024169	0.176596	0.162232			0.070081	0.106618	0.35206	0.085546	0.025097
	0.63528	0.262967	0.239669	0.106509	0.5			0.369515	0.051965	0.330861	0.1569	0.367515			0.157827	0.053476	0.225367	0.189914	0.037223			0.379404	0.238771	0.028689	0.114398	0.113411
	0.554631	0.191011	0.048485	0.466986	0.709124			0.53981	0.016949	0.321253	0.319923	0.332694			0.089604	0.123389	0.034591	0.173193	0.012461			0.240506	0.075292	0.131336	0.111252	0.283051
	0.726368	0.462468	0.25139	0.691589	0.632454			0.394429	0.268803	0.297312	0.37401	0.393597			0.113664	0	0.388889	0.134423	0.039196			0.278261	0.108414	0.239583	0.269772	0.126001
	0.466667	0.435308	0.380714	0.552865	0.448006			0.112514	0.123016	0.317507	0.21459	0.334373			0.114771	0.007233	0.153436	0.243208	0.046154			0.322767	0.139601	0.046763	0.368526	0.096573
	0.520902	0.288243	0.472222	0.562464	0.596107			0.172054	0.344173	0.447352	0.414127	0.304985			0.471668	0.052572	0.115519	0.562929	0.117668			0.313458	0.194121	0.15	0.055707	0.021296
	0.552301	0.402597	0.32844	0.544974	0.487914			0.242215	0.277661	0.232759	0.335097	0.257329			0.211155	0.000775	0.044983	0.165171	0.072235			0.242695	0.247706	0.039216	0.149378	0.087045
	0.720871	0.382162	0.342828	0.693878	0.432432			0.200189	0.210317	0.389398	0.320927	0.347345			0.327245	0.012915	0.092054	0.000768				0.287591	0.047189	0.174946	0.00625	0.040642
	0.442124	0.600386	0.074813	0.746947	0.187723			0.091476	0.257807	0.219568	0.291804	0.306324			0.092211	0.096463	0.035294	0.093886				0.522034	0.217116	0.067542	0.007519	0.037393
	0.211519	0.485915	0.322002	0.784	0.311857			0.289474	0.16837	0.132194	0.461221	0.265905			0.075591	0.096878	0.004717	0.084564				0.372368	0.062016	0.066787	0.015209	0.063593
	0.254007	0.508117	0.17623	0.834831	0.263785			0.226608	0.034277	0.171377	0.4928	0.349474			0.073491	0.021498	0.008021	0.042969				0.469414	0.037915	0.057252	0.192727	0.121905
	0.56455	0.426866	0.158262	0.636463	0.464527			0.442359	0.012132	0.142269	0.129893	0.267871			0.420779	0.094816	0.049046	0.020485					0.059172	0.081377	0.050649	0.149174
	0.490741	0.454887	0.519838	0.361827	0.282875			0.221538	0.206052	0.155477	0.493333	0.650718			0.196494	0.130872	0.051576	0.193733					0.134048	0.223127	0.015504	0.089928
	0.666451	0.192058	0.298527	0.540127	0.397891			0.207792	0.05819	0.259513	0.490577	0.473032			0.197135		0.126961	0.016713					0.168582		0.040084	0.180161
	0.679612	0.471737	0.432526	0.369128	0.472208			0.058442	0.141486		0.488239	0.421053			0.146687		0.034091	0.025424					0.424915		0.046961
	0.531843	0.484554	0.678814	0.42311	0.591849			0.262927	0.136514		0.518567	0.20339			0.206337		0.048255	0.306517					0.250836		0.136476
	0.703842	0.719027		0.564103	0.646308			0.117371	0.318813		0.43142	0.476645					0.082173	0.099078			Experiment 3	0.41555	0.057692	0	0.323436	0.025641
	0.659806	0.75		0.483398	0.548146			0.375	0.163117		0.291358	0.225125						0.005464				0.367532	0.03178	0	0.197605	0.020513
	0.657143	0.249468		0.533989	0.685553			0.318019	0.216131		0.517026	0.181818						0.030708				0.353818	0.010067	0.031847	0.073801	0.033333
		0.257631		0.296987	0.696302			0.373409				0.192		Experiment 3	0.030523	0.070889	0.029806	0.010563	0.021834			0.047619	0.023885	0.004202	0.049123	0
		0.337651		0.429435				0.29515				0.141129			0.164395	0	0.05394	0.003378	0.044505			0.289086	0.088626	0.036496	0.287113	0.174825
		0.291508		0.467244				0.26312				0.251149			0.164188	0.008086	0.005018	0.147161	0.08708			0.140741	0.010965	0.009302	0.28953	0.044643
		0.73494		0.384375				0.366969				0.417503			0.197849	0.003448	0.008636	0	0.240741			0.552885	0.068602	0.012255	0.161652	0.047414
				0.595437				0.37032				0.276519			0.166402	0.027012	0.041771	0.18021	0.22538			0.264069	0.129187	0.002574	0.027616	0.182741
				0.783766				0.251921							0.123902	0.044262	0.064046	0.014113	0.089401			0.334653	0.012097	0.04334	0.317383	0.007634
Experiment 3	0.248271	0.09517	0.112745	0.466504	0.495958		Experiment 3	0.015526	0.052977	0.055361	0.154499	0.262408			0.19942	0.120515	0.015942	0.013947	0.047554			0.513595	0.033254	0.021465	0.40552	0.052632
	0.394588	0.126514	0.13482	0.336074	0.324355			0.012882	0.102773	0.09959	0.267047	0.19847			0.434166	0.008292	0.047833	0.151891	0			0.235294	0.302326	0.006324	0.581239	0.1
	0.553649	0.378171	0.130368	0.676976	0.516245			0.15165	0.103938	0.062678	0.369368	0.125049			0.147742	0.076066	0.009033	0.280903	0.117686			0.390756	0.031746	0.048976	0.350932	0.012963
	0.373916	0.09702	0.298305	0.701267	0.507559			0.089318	0.233438	0.055469	0.351544	0.255994			0.260019	0	0.003208	0.241107	0.352305			0.389356	0.025253	0	0.559973	0.097143
	0.23581	0.256618	0.170197	0.578995	0.446439			0.040511	0.212238	0.107218	0.055608	0.007051			0.403805	0.052632	0.002358	0.162693	0			0	0.030928	0.017391	0.066845	0.032653
	0.35251	0.020091	0.13	0.625439	0.339202			0.189554	0.06986	0.145634	0.250287	0.402023			0.420839	0.008893	0.002893	0.205097	0.263374			0.1611	0	0.003964	0.070729	0.105263
	0.469162	0.078303	0.168376	0.348626	0.350266			0.326989	0.062229	0.063506	0.150442	0.17994			0.192297	0.043196	0.020656	0.177996	0.202756			0.280362	0.029536	0.006826	0.56797	0.107438
	0.296538	0.198614	0.129704	0.360885	0.285853			0.134058	0.116938	0.175071	0.109383	0.270338			0.093333	0.003115	0.008299	0.003521	0.229035			0.338521	0.017341	0.027273	0.024691	0.011765
	0.447525	0.211645	0.078474	0.402693	0.429139			0.341892	0.166728	0.131512	0.382316	0.019334			0.160813	0.006979	0.010518	0.010338	0.061701			0.020161	0	0.007412	0.489235	0.100467
	0.003802	0.11611	0.083141	0.277624	0.241247			0.115223	0.261584	0.035065	0.36351	0.21045			0.164185	0.074534	0.025931	0.023897	0.3424			0.066667	0.014493	0.012302	0.479062	0.268987
	0.175303	0.217471	0.103513	0.742597	0.110048			0.291476	0.228538	0.00304	0.201696	0.27931			0.155368	0.136564	0.051195	0.156061	0.304672			0.054545	0	0.009818	0.249384	0.137079
	0.185855	0.349419	0.335306	0.552048	0.150061			0.406668	0.217801	0.194069	0.349094	0.479158			0.396837	0.178241	0.014959	0.032068	0.303464			0.11039	0.041885	0.047592	0.165306	0.204614
	0.642478	0.257862	0.186702	0.674149	0.26055			0.247796	0.192705	0.114819	0.435159	0.467072			0.10167	0.002985	0.024036	0.140171	0.414229			0.166667	0.019531	0	0.105263	0
	0.193004	0.395733	0.0322	0.71008	0.36644			0.149457	0.242036	0.109137	0.112374	0.11269			0.061115	0.001866	0.009461	0.129878	0.29329			0.263636	0.240618	0.015817	0.011142	0.071942
	0.515049	0.303147	0.186343	0.72459	0.528597			0.269139	0.394842	0.091147	0.215282	0.354536			0.198344	0.175084	0.010028	0.155305	0.135806			0.040449	0.006079	0.032143	0.211838	0.183946
	0.403169	0.205823	0.076557	0.584854	0.29827			0.134615	0.123007	0.276119	0.098962	0.539718			0.320183	0.019231	0.011867	0.028694	0.188024			0.029412	0.19403	0	0.132353	0.411402
	0.395522	0.218264	0.091527	0.235741	0.351965			0.259337	0.131458	0.185737	0.044086	0.285586			0.093732	0.062241	0.042937	0.158505	0.125146			0.158621	0.162442	0.013423	0.208651	0.02439
	0.274867	0.453412	0.011029	0.592447	0.365211			0.097498	0.174212	0.141732	0.154529	0.312917			0.172003	0.073001	0.045209	0.020915	0.148562			0.425439	0.157025	0.040872	0.359155	0.223022
	0.595294	0.281381	0.017405	0.298623	0.060021			0.095483	0.340507	0.019197	0.291748	0.440749			0.251637	0.218674	0.059105	0.093023				0.423456	0.028302	0.010574	0.113111	0.296935
	0.176849	0.731615	0.377346	0.476943	0.382022			0.129445	0.178267	0.017183	0.612172	0.247186			0.433972	0.056373		0.019305				0.423216	0.132626	0.028725	0.073786	0.526316
	0.156743	0.308537	0.28074	0.564501	0.008929			0.163021	0.269142	0.020004	0.362764	0.2974			0.211538	0.16965		0.137681				0.101563	0.095076	0.11996	0.151394	0.125806
	0.460656	0.644518	0.022252	0.283293	0.313484			0.149547	0.238118	0.034057	0.176631	0.169993						0.14711				0.36875	0.180818	0.033932	0.270093	0.042553
	0.505525	0.502188	0.265107	0.588339	0.251143			0.329639	0.11171	0.021461	0.363965	0.138184						0.095945				0.162791		0.049161		0.023256
	0.362875		0.058721	0.828554	0.296814			0.313329	0.059172	0.03738	0.562901	0.119943						0.074074				0.564384				0.111111
	0.533956		0.078261	0.441778	0.354446			0.269919	0.261449	0.007306	0.175414	0.128374						0.263954				0.295302				0.661211
	0.214863		0.028369	0.748708	0.291667			0.267547	0.151484	0.04778	0.505633	0.24132						0.151515				0.4
	0.459531		0.070056	0.665455	0.180595			0.085851	0.048108	0.025913	0.369336	0.291118						0.105185				0.485714
	0.583767		0.026483	0.218223	0.357871			0.087241	0.054137	0.181388		0.289338						0.349536				0.253264
	0.831143		0.020063	0.47164	0.299952			0.216631	0.100564	0.080741		0.159037										0.415612
	0.242991		0.049721					0.61201		0.057202		0.147441										0.411268
	0.660336		0.006703					0.490054		0.08309		0.235119
	0.641499		0.040404					0.550868				0.213506
			0.026471					0.357874
