# Supplementary material for: Lipid kinases VPS34 and PIKfyve coordinate a phosphoinositide cascade to regulate retriever-mediated recycling on endosomes
Source: eLife journal article supplement (doi:10.7554/elife.69709), 2022-01-18
Supplement: fig5-figsupp1-data1 [file Figure5-figure supplement 1B.xlsx]

## Sheet: Sheet1
Figure 5-figure supplement 1B
Effect of apilimod treatment on total integrin levels
Band intensity				Ratio			Normalized to DMSO levels
	b1-integrin			b1-integ/GAPDH			b1-integ/GAPDH
	DMSO	Apilimod		DMSO	Apilimod		DMSO	Apilimod
Expt1	77562716	74214750		1.69929	1.72336		1	1.01417
Expt2	69932382	62091470		1.68392	1.72078		1	1.02189
Expt3	74202456	64115768		1.19576	1.33293		1	1.11471
	GAPDH
	DMSO	Apilimod
Expt1	45644291	43063950
Expt2	41529618	36083250
Expt3	62054402	48101283
