# Supplementary material for: Lipid kinases VPS34 and PIKfyve coordinate a phosphoinositide cascade to regulate retriever-mediated recycling on endosomes
Source: eLife journal article supplement (doi:10.7554/elife.69709), 2022-01-18
Supplement: fig6-data1 [file Figure 6B.xlsx]

## Sheet: Sheet1
Quantification of the surface levels of b1-integrin, a5-integrin and LRP1 upon treatment with apilimod
			Adj. Volume (Int)				Surface to total ratio				Values normalized to DMSO
			Expt 1	Expt2	Expt3	Expt4	Expt 1	Expt2	Expt3	Expt4	Expt 1	Expt2	Expt3	Expt4
b1-integrin	total	DMSO	14493380	208579059	164797710	105980546
		apilimod	16382850	203984144	169421499	127328000
	surface	DMSO	10721975	72431830	22057289	35563424	0.739784	0.347263	0.133845	0.335566	1	1	1	1
		apilimod	6239420	41075640	15218385	20520995	0.380851	0.201367	0.0898256	0.161166	0.514813	0.579869	0.671118	0.480283
a5-integrin	total	DMSO	1352505	23894880	14410116	8904856
		apilimod	1586695	22480230	16857570	18446064
	surface	DMSO	3907805	37447626	22380960	32153481	2.88931	1.56718	1.55314	3.61078	1	1	1	1
		apilimod	2684825	23057436	13974290	24421376	1.69209	1.02568	0.828962	1.32393	0.585639	0.654467	0.533729	0.366661
LRP1	total	DMSO	374882271	567809943	458484106
		apilimod	593875462	502516980	540691884
	surface	DMSO	271838112	277850925	57639168		0.725129	0.489338	0.125717		1	1	1
		apilimod	169619772	188398575	23559915		0.285615	0.37491	0.043574		0.393881	0.766158	0.346604
