# Supplementary material for: Lipid kinases VPS34 and PIKfyve coordinate a phosphoinositide cascade to regulate retriever-mediated recycling on endosomes
Source: eLife journal article supplement (doi:10.7554/elife.69709), 2022-01-18
Supplement: fig6-data1 [file Figure 6D.xlsx]

## Sheet: Sheet1
Colocalization of PIKfyve with Retriever-recycling pathway protein subunits ( Mander's coefficient)
SNX17	VPS35L	FAM21	Strumpellin	COMMD1	CCDC93
0.117	0.571	0.431	0.408	0.502	0.353
0.133	0.531	0.36	0.404	0.468	0.348
0.097	0.511	0.396	0.366	0.505	0.512
0.139	0.392	0.436	0.378	0.628	0.505
0.132	0.548	0.344	0.328	0.389	0.493
0.302	0.558	0.438	0.367	0.499	0.496
0.24	0.331	0.486	0.352	0.409	0.409
0.418	0.709	0.496	0.417	0.508	0.517
0.37	0.545	0.419	0.329	0.511	0.428
0.293	0.485	0.48	0.353	0.383	0.392
0.695	0.289	0.349	0.37	0.303	0.559
0.485	0.587	0.399	0.324	0.391	0.49
0.273	0.364	0.299	0.354	0.464	0.39
0.286	0.283	0.333	0.161	0.423	0.593
0.344	0.312	0.329	0.351	0.377	0.498
Colocalization of PIKfyve with Retriever-recycling pathway protein subunits ( Mander's coefficient as percentage)
SNX17	VPS35L	FAM21	Strumpellin	COMMD1	CCDC93
11.7	57.1	43.1	40.8	50.2	35.3
13.3	53.1	36	40.4	46.8	34.8
9.7	51.1	39.6	36.6	50.5	51.2
13.9	39.2	43.6	37.8	62.8	50.5
13.2	54.8	34.4	32.8	38.9	49.3
30.2	55.8	43.8	36.7	49.9	49.6
24	33.1	48.6	35.2	40.9	40.9
41.8	70.9	49.6	41.7	50.8	51.7
37	54.5	41.9	32.9	51.1	42.8
29.3	48.5	48	35.3	38.3	39.2
69.5	28.9	34.9	37	30.3	55.9
48.5	58.7	39.9	32.4	39.1	49
27.3	36.4	29.9	35.4	46.4	39
28.6	28.3	33.3	16.1	42.3	59.3
34.4	31.2	32.9	35.1	37.7	49.8
