# Supplementary material for: Lipid kinases VPS34 and PIKfyve coordinate a phosphoinositide cascade to regulate retriever-mediated recycling on endosomes
Source: eLife journal article supplement (doi:10.7554/elife.69709), 2022-01-18
Supplement: fig6-figsupp1-data1 [file Figure6-figure supplement 1B.xlsx]

## Sheet: Sheet1
Figure 6-figure supplement 1B
Effect of Pikfyv siRNA and rescue on a5-integrin levels
	Integrated density values						Normalized to control siRNA treatment
		PIKfyve sirna						PIKfyve sirna
	ctrl sirna	no transfection	PIKfyve WT		average		ctrl sirna	no transfection	PIKfyve WT
Exp1	10128.3	10141.8	34097.9		11981.2		0.845344	0.846472	2.84594
	8842.23	13285.7	19910.3				0.738006	1.10887	1.66179
	7513.89	22051.6	15174.7				0.627138	1.84051	1.26654
	7109.17	12787	13493.5				0.593358	1.06725	1.12622
	7505.73	12624.1	22321.8				0.626457	1.05365	1.86306
	5868.74	16354.1	21400				0.489827	1.36498	1.78612
	7629.12	12956.9	14127.7				0.636755	1.08143	1.17915
	8534.3	14407.9	11310.3				0.712305	1.20254	0.944
	8268.07	15666.5	51054.9				0.690085	1.30758	4.26124
	8002.66	12227	58928.4				0.667933	1.02052	4.91838
	10376.6	10014.6	14496.8				0.866073	0.835859	1.20996
	9614.42	12389.7	18116				0.802456	1.0341	1.51203
	7940.89	17034.8	15992.2				0.662777	1.42179	1.33477
	10643.4	19542.9	15574.6				0.888336	1.63112	1.29992
	10696.8	5866.5	7015.74				0.892798	0.489641	0.58556
	10622.6	4949.85	16073.4				0.886601	0.413133	1.34155
	8941.17	4548.8	22005.7				0.746264	0.37966	1.83668
	9886.05	16152.6	28546.4				0.825127	1.34816	2.38259
	9226.26	11317.1	36876				0.770059	0.944568	3.07781
	8164.3	9911.01	30507.1				0.681424	0.827211	2.54623
	20748.4	9015.23	17499.3				1.73174	0.752446	1.46056
	12415.2	9644.79					1.03622	0.804991
	12204.7	12896.4					1.01865	1.07638
	13143.8	13904.4					1.09703	1.16052
	17726.4	17708.5					1.47951	1.47802
	20645	8413.49					1.72311	0.702222
	17683.9	12210.5					1.47597	1.01913
	12670	11100.2					1.05749	0.926465
	14792.5	11832.7					1.23464	0.987601
	18906.5	8162.94					1.57801	0.68131
	29072.1	6523.74					2.42647	0.544496
	19058.9	9261.26					1.59073	0.77298
	8791.28	10370.5					0.733754	0.865565
	9064.85	8088					0.756587	0.675055
	11460.2	12444.2					0.956512	1.03864
	12440.3	8352.1					1.03832	0.697098
	10536.5	7782.44					0.87942	0.649552
	8643.58	9147.7					0.721426	0.763502
	11206	9344.58					0.935294	0.779934
	8824.07	5647.57					0.73649	0.471368
	6128.93	8602.49					0.511544	0.717996
	6828.22	9983.28					0.569909	0.833243
	6893.64	10134.7					0.57537	0.845884
	10657.9	7459.96					0.889547	0.622637
	6820.12	6905.35					0.569233	0.576347
	5403.62	6477.4					0.451007	0.540628
	9413.61	4594.74					0.785695	0.383494
	8404.47	7047.15					0.701469	0.588182
	11181.8	8898.99					0.933274	0.742743
	11924.6	6686.91					0.995273	0.558115
	19216.3	7299.52					1.60387	0.609246
	11558.5	8784.19					0.964714	0.733162
	11188.1	7831.9					0.9338	0.65368
	11445.5	7267.26					0.955287	0.606553
	11200.4	9306.85					0.93483	0.776785
	9704.14	9432.95					0.809945	0.78731
	18426.4	6139.55					1.53794	0.51243
	8518.93	4398.26					0.711023	0.367096
	11340.2	5354.91					0.946493	0.446941
	17454.5	5985.66					1.45682	0.499586
	20122.8	9827.17					1.67953	0.820213
	13514.8	14714.3					1.128	1.22811
	12232.8	10383.2					1.02099	0.866621
	19511.6	9442.75					1.62851	0.788128
	18918.7	12880.9					1.57903	1.07509
	18504.7	9383.17					1.54448	0.783155
	16660.1	9098.78					1.39051	0.759419
	14671.8	15352.2					1.22456	1.28135
	17908.5	5694.13					1.49471	0.475254
	9971.41	13165.6					0.832251	1.09885
	9039.52	10910.5					0.754473	0.91063
	9930.76	11464.6					0.828859	0.956876
	9388.1	8397.45					0.783566	0.700883
	11049.5	12505.2					0.922229	1.04373
	14540.9	11181.4					1.21364	0.933244
	13249.6	13461.1					1.10586	1.12351
	10914	11214.7					0.910926	0.936018
	16524.5						1.3792
	14365.7						1.19902
	11242.4						0.93833
	9395.67						0.784198
	17809.6						1.48646
	8144.33						0.679757
	8794.92						0.734057
	9952.2						0.830648
	14769						1.23268
Exp2	11359.5	12442.1	14518.3		17407.1		0.652582	0.714772	0.834045
	12779.3	12787.6	21594.5				0.734143	0.734623	1.24056
	13070.2	11421.3	42165				0.750854	0.656133	2.4223
	13829.9	9037.42	37167.6				0.794497	0.519181	2.13521
	12155.1	5094.88	6868.68				0.698286	0.29269	0.394592
	10536.9	7497.17	6968.61				0.605321	0.430697	0.400333
	16799.6	6346.74	6744.91				0.965103	0.364607	0.387481
	16320.9	8144.51	9386.43				0.937604	0.467886	0.539231
	22244.4	6936.39	6852.57				1.2779	0.398482	0.393666
	14612.6	10551.7	7163.96				0.839464	0.606176	0.411555
	6834.31	8976.73	4607.21				0.392617	0.515695	0.264675
	9827.98	14844.4	9051.9				0.564598	0.852779	0.520013
	11033.7	12507.3	7342.7				0.633866	0.718519	0.421823
	7456.37	16471.9	18067.5				0.428353	0.946277	1.03794
	11153.8	15232.2	24735.1				0.640765	0.875058	1.42098
	33699.5	10078.1	28135.4				1.93597	0.578966	1.61632
	7663.3	12333.4	15998.2				0.440241	0.70853	0.919062
	15164.5	12284.4	16849.3				0.871172	0.705714	0.967956
	7071.57	10500	12091.3				0.406247	0.603203	0.694618
	19497.8	7463.64	10738.2				1.12011	0.428771	0.616886
	13827.9	5307.94	8987.71				0.794386	0.30493	0.516326
	18491.9	6629.77	14789.7				1.06232	0.380867	0.849639
	12627.6	8174.74	10226				0.725432	0.469622	0.587464
	12484.2	5520.48	20137.3				0.717191	0.31714	1.15684
	10673.6	7270.12	23550.3				0.613177	0.417653	1.35292
	15126.9	18101.2	56252.5				0.86901	1.03988	3.23159
	18342.5	9111.82	32655.8				1.05374	0.523456	1.87601
	8223.02	12116.4	32488.9				0.472396	0.696064	1.86642
	8320.6	8756.4	44317.1				0.478002	0.503037	2.54593
	8968.15	11148	18333.7				0.515202	0.64043	1.05323
	8918.24	20126.1	31203.4				0.512335	1.1562	1.79257
	24413.5	28505.9	30783.7				1.40251	1.63761	1.76846
	16904.5	11473.2					0.971131	0.659111
	8124.26	7596.99					0.466723	0.436432
	17931.6	11925.2					1.03014	0.685081
	19776.1	18278.2					1.1361	1.05005
	30648.9	13645.8					1.76072	0.783923
	28055.8	10919.4					1.61175	0.627295
	30653.7	6522.7					1.76099	0.374716
	28599.4	15702.6					1.64298	0.902082
	18069.1	21701.3					1.03803	1.24669
	26241.1	15263.8					1.5075	0.876872
	23544.2	17368.2					1.35256	0.997768
	45837.9	16900.8					2.6333	0.970916
	36042.1	17072.2					2.07055	0.980763
	23508.8	14169					1.35054	0.813981
	34195.5	23158.8					1.96446	1.33043
	17334.8	14469.4					0.995852	0.831235
	29596.4	21149.9					1.70026	1.21502
	18728	14468.2					1.07589	0.831171
	32450.4	22504.6					1.86421	1.29284
	34710.3	7512.11					1.99403	0.431555
	23800.4	37276.8					1.36728	2.14148
	29238.8	40967.4					1.67971	2.3535
	8789.95	13456.2					0.504965	0.773034
	14244.5	17589.7					0.818315	1.01049
	13079	12975.6					0.751362	0.745422
	7853.18	8437.05					0.45115	0.484692
	7160.77	8059.56					0.411372	0.463005
	20472.8	6995.38					1.17612	0.401871
	11409.7	13167.2					0.655462	0.75643
	8637.8	13754.8					0.496224	0.790183
	9404.93	20293.4					0.540294	1.16582
	10375	14015.5					0.59602	0.805163
	15688.2	18676.4					0.901258	1.07292
	17651.7	33689					1.01406	1.93536
	13399	11150.5					0.769746	0.640576
	17991.6	9960.51					1.03358	0.572211
		15148.1						0.87023
		15669.4						0.900173
		11865.9						0.68167
		6841.93						0.393055
		10989						0.631295
		8687.12						0.499058
		18512.2						1.06349
		13593.9						0.78094
		15782.1						0.906652
		5659.27						0.325114
		7811.84						0.448774
		5577.86						0.320437
		8159.08						0.468723
		8953.93						0.514385
		4288.3						0.246354
		5719.69						0.328584
		4513.35						0.259283
		5285.23						0.303626
		7138.43						0.410088
		8932.56						0.513158
Exp3	16837.5	25593.5	11407		19330.9		1.35327	2.05702	0.916809
	23185.6	9831.1	16770.1				1.86348	0.79015	1.34785
	23999.1	12818.1	22332.4				1.92887	1.03022	1.79491
	17041	18892.8	22094.8				1.36962	1.51846	1.77581
	19599.1	18245.1	12628.6				1.57523	1.4664	1.01499
	14054.9	36608.1	36331				1.12963	2.94228	2.92001
	29197.9	23652.3	85608.9				2.3467	1.901	6.8806
	32165.6	19912.3	39009				2.58523	1.6004	3.13525
	16179.1	18351.1	22938.3				1.30035	1.47492	1.84361
	19961.1	17787.7	21162.9				1.60432	1.42964	1.70092
	19033.4	7870.2	56608.6				1.52976	0.632547	4.54977
	12648.1	9758.55					1.01656	0.784319
	24736.8	27885.2					1.98816	2.24121
	16603	31569.3					1.33443	2.5373
	11085.9	11537.7					0.891003	0.927318
	15634.2	24818.3					1.25656	1.99471
	15841.2	18435.6					1.27319	1.48172
	16989.9	37483.3					1.36552	3.01263
	13702	33394.6					1.10126	2.68401
	14663.2	6838.42					1.17852	0.549621
	16630.4	18671.1					1.33663	1.50064
	20719.9	19082.2					1.66531	1.53368
	16074.7	25558.7					1.29196	2.05421
	15278.6	16482.1					1.22798	1.3247
	13711.4	6428.07					1.10202	0.51664
	10784.3	15193.3					0.866762	1.22113
	19774.3	17927.3					1.58931	1.44087
	19431.1	24656.3					1.56172	1.98169
	20444.9	25257.3					1.64321	2.02999
	20357.1	28798.4					1.63615	2.3146
	38158.8	22432.3					3.06692	1.80294
	34754.4	17347.7					2.7933	1.39428
	33671.2	7223.6					2.70624	0.580579
	18768	12510.7					1.50843	1.00552
	25448.2	11355.1					2.04534	0.912641
	52831.7	13849.3					4.24621	1.1131
	35640.4	27197.3					2.86451	2.18591
	30942.8	15642.4					2.48695	1.25722
	13256.3	8530					1.06544	0.685578
	12947	7810.98					1.04058	0.627788
	8704.63	9060.28					0.699613	0.728198
	13756.4	8785.45					1.10563	0.706109
	19887.5	10306.6					1.59841	0.828364
	23580.6	12797.7					1.89523	1.02858
	23333.9	10286.7					1.8754	0.826771
	18173.1	8874.27					1.46062	0.713247
	13078	15204.3					1.05111	1.222
	11169.7	28000.1					0.89774	2.25044
	11453.9	29792.5					0.92058	2.3945
	17056.4	17464.5					1.37086	1.40367
	23405.7						1.88117
	13168.2						1.05836
	12412.8						0.99765
	9958.44						0.800384
	13346.9						1.07272
	17670						1.42018
	15793.1						1.26933
	20203.2						1.62379
	12978						1.04307
	20909.5						1.68055
	16358.7						1.31479
