# Supplementary material for: Lipid kinases VPS34 and PIKfyve coordinate a phosphoinositide cascade to regulate retriever-mediated recycling on endosomes
Source: eLife journal article supplement (doi:10.7554/elife.69709), 2022-01-18
Supplement: fig6-figsupp2-data1 [file Figure6-figure supplement 2B.xlsx]

## Sheet: Sheet1
Figure 6-figure supplement 2B
Effect of apilimod treatment on surface levels of EGFR
	Int. density					Normalized to DMSO
				average of DMSO
	DMSO	Apilimod				DMSO	Apilimod
Exp1	123.846	118.962		215.263		0.575324	0.552635
	175.172	137.845				0.813757	0.640356
	60.439	93.521				0.280768	0.43445
	136.659	137.464				0.634846	0.638586
	120.473	99.601				0.559654	0.462694
	138.451	145.581				0.643171	0.676293
	68.925	174.062				0.320189	0.808601
	55.061	144.986				0.255785	0.673529
	167.361	143.532				0.777471	0.666774
	130.534	140.593				0.606393	0.653121
	189.238	210.341				0.879101	0.977134
	230.642	189.599				1.07144	0.880778
	232.382	291.649				1.07952	1.35485
	211.954	445.162				0.984627	2.06799
	204.722	153.734				0.951031	0.714168
	158.701	129.544				0.737242	0.601794
	278.026	247.96				1.29156	1.15189
	202.084	270.854				0.938776	1.25825
	231.516	436.292				1.0755	2.02678
	183.082	194.073				0.850503	0.901561
	228.473	194.073				1.06137	0.901561
	162.371	194.073				0.754291	0.901561
	329.544	178.536				1.53089	0.829385
	416.57	212.116				1.93517	0.98538
	244.573	184.468				1.13616	0.856942
	176.935	131.318				0.821947	0.610035
	128.723	112.639				0.59798	0.523262
	315.319	124.847				1.46481	0.579974
	140.456	95.249				0.652485	0.442477
	116.148	251.274				0.539563	1.16729
	186.134	114.504				0.864681	0.531926
	177.713	203.485				0.825561	0.945285
	254.745	179.07				1.18341	0.831865
	191.372	526.708				0.889014	2.44681
	194.023	181.335				0.901329	0.842387
	158.978	289.787				0.738528	1.3462
	242.625	381.824				1.12711	1.77375
	135.047	132.158				0.627358	0.613937
	155.96	254.491				0.724508	1.18223
	282.877	156.604				1.3141	0.7275
	181.074	132.017				0.841175	0.613282
	592.176	115.085				2.75094	0.534625
	474.854	148.47				2.20592	0.689714
	185.988	246.77				0.864003	1.14636
	214.762	166.25				0.997672	0.77231
	303.198					1.4085
	312.873					1.45344
	298.721					1.3877
	349.589					1.62401
	312.071					1.44972
Exp. 2	188.39	165.643		200.443		0.939868	0.826384
	215.192	89.132				1.07358	0.444675
	168.214	109.124				0.839211	0.544414
	119.579	107.853				0.596573	0.538073
	241.348	134.962				1.20407	0.673318
	252.392	132.449				1.25917	0.660781
	166.547	168.215				0.830894	0.839216
	314.184	132.432				1.56745	0.660696
	227.571	152.879				1.13534	0.762705
	169.612	64.944				0.846185	0.324002
	111.394	127.341				0.555739	0.635297
	97.166	98.623				0.484756	0.492025
	94.995	94.485				0.473925	0.471381
	124.835	108.889				0.622795	0.543241
	398.72	48.958				1.98919	0.244249
	164.409	85.583				0.820228	0.426969
	248.14	244.464				1.23796	1.21962
	244.918	144.565				1.22188	0.721227
	168.819	126.519				0.842229	0.631197
	252.072	136.193				1.25757	0.67946
	167.852	221.153				0.837405	1.10332
	157.888	113.598				0.787695	0.566734
	167.215	345.795				0.834227	1.72515
	104.326	235.118				0.520477	1.17299
	342.821	364.446				1.71032	1.8182
	243.793	150.146				1.21627	0.74907
	167.177	291.391				0.834037	1.45373
	325.454	187.119				1.62367	0.933527
	233.403	216.583				1.16444	1.08052
	134.867	276.085				0.672844	1.37737
		192.266					0.959205
Exp. 3	164.315	194.312		150.337		1.09298	1.29251
	197.688	79.513				1.31497	0.5289
	107.866	218.605				0.717497	1.4541
	76.582	432.908				0.509404	2.87959
	131.133	78.039				0.872263	0.519095
	108.504	161.433				0.721741	1.07381
	184.963	202.584				1.23033	1.34754
	209.033	209.053				1.39043	1.39057
	125.857	122.543				0.837169	0.815125
	205.481	174.322				1.36681	1.15955
	90.627	316.885				0.602828	2.10784
	152.912	106.291				1.01713	0.707021
	171.396	93.193				1.14008	0.619896
	135.061	80.818				0.898391	0.537581
	171.768	122.883				1.14256	0.817386
	90.539	189.753				0.602242	1.26219
	162.274	94.45				1.07941	0.628257
	161.677	129.417				1.07543	0.860849
	122.014	202.383				0.811606	1.3462
	237.04	194.669				1.57673	1.29489
		174.819					1.16285
		160.613					1.06836
		234.751					1.5615
		86.453					0.575063
		127.318					0.846887
		106.584					0.70897
