# Supplementary material for: Lipid kinases VPS34 and PIKfyve coordinate a phosphoinositide cascade to regulate retriever-mediated recycling on endosomes
Source: eLife journal article supplement (doi:10.7554/elife.69709), 2022-01-18
Supplement: fig7-data1 [file Figure 7B.xlsx]

## Sheet: Sheet1
Effect of apilimod and apilimod + VPS34-IN1 treatment on localization of COMMD1, VPS35L, FAM21 and SNX17 on VPS35 positive compartments
	Integrated density of COMMD1 in VPS35 positive compartments						Intensity of COMMD1 in VPS35 (normalized to average of DMSO)						Integrated density of VPS35L in VPS35 positive compartments						Intensity of VPS35L in VPS35 (normalized to average of DMSO)							Integrated density of FAM21 in VPS35 positive compartments						Intensity of FAM21 in VPS35 (normalized to average of DMSO)						Integrated density of SNX17 in VPS35 positive compartments						Intensity of SNX17 in VPS35 (normalized to average of DMSO)
	DMSO	Apilimod	apilimod + VPS34-IN1		DMSO avg		DMSO	Apilimod	apilimod + VPS34-IN1				DMSO	Apilimod	apilimod + VPS34-IN1		average of DMSO		DMSO	Apilimod	apilimod + VPS34-IN1					DMSO	Apilimod	apilimod + VPS34-IN1		average of DMSO		DMSO	Apilimod	apilimod +VPS34-IN1				DMSO	Apilimod	apilimod + VPS34-IN1		average of DMSO		DMSO	Apilimod	apilimod + VPS34-IN1
Experiment 1	11568.1	9224.07			11391.5		1.0155	0.80973				Experiment 1	8399.33	8608.52			6029.49		1.39304	1.42774					Experiment 1	3486.67	4450.71			4884.18		0.71387	0.91125				Experiment 1	6445.11	7138.55			10543.2		0.611307	0.677078
	10903.6	4418.79					0.957162	0.387901					11742.9	8029.39					1.94758	1.33169						3344.57	4890.12					0.684776	1.00122					6362.39	5757.29					0.60346	0.546068
	13506.3	6507.2					1.18564	0.571231					9808.99	7847.03					1.62684	1.30144						2375.42	4116.11					0.48635	0.842744					7670.6	7295.31					0.727541	0.691946
	9294.64	12995.3					0.815925	1.14079					8711.69	6503.81					1.44485	1.07867						2162.59	4089.28					0.442774	0.83725					5942.97	6194.08					0.56368	0.587496
	9098.75	11930.1					0.798729	1.04728					7379.38	7174.95					1.22388	1.18998						3436.99	4738.12					0.703698	0.970096					4387.28	3691.07					0.416125	0.350091
	7232.62	8993.91					0.634911	0.789525					6046.68	6873.83					1.00285	1.14004						4437.75	3804.24					0.908597	0.77889					4148.44	4313.32					0.393472	0.40911
	13197.6	8777.36					1.15854	0.770516					11162.5	7418.62					1.85132	1.23039						5665.52	3499.4					1.15997	0.716476					6280.55	4667.15					0.595698	0.44267
	7966.85	9204.1					0.699365	0.807976					6872.38	9160.33					1.1398	1.51926						4891.55	11038.4					1.00151	2.26002					21949.7	11041.9					2.08189	1.0473
	6341.39	5625.03					0.556675	0.49379					8696.66	6237.07					1.44235	1.03443						4768.94	6375.4					0.976405	1.30532					12471.9	5237.82					1.18294	0.496797
	10629.9	7686.32					0.933143	0.674739					3437.84	8584.44					0.570172	1.42374						3593.01	5106.98					0.735643	1.04562					16091.4	11554.5					1.52623	1.09592
	10722.5	11414.6					0.941265	1.00202					8338.6	8307.79					1.38297	1.37786						3480.24	4445.62					0.712554	0.910209					10069.9	9141.35					0.955115	0.867039
	16106	12551.5					1.41385	1.10183					6050.39	9572.31					1.00347	1.58758						15976.8	5269.22					3.27113	1.07884					6227.44	5577.6					0.59066	0.529024
	7758.23	11379.7					0.681052	0.998962					7527.46	6306.19					1.24844	1.04589						7092.98	7513.03					1.45224	1.53824					9389.12	7044.01					0.89054	0.668111
	16580.4	13552.1					1.4555	1.18967					8866.86	6936.13					1.47058	1.15037						6263.47	7290.69					1.2824	1.49272					7042.31	8376.53					0.66795	0.794498
	9229.48	7621.47					0.810205	0.669046					8586.67	7880.68					1.42411	1.30702						5375.49	8006.41					1.10059	1.63925					5775.93	10218.3					0.547836	0.969188
	16509.9	7866.47					1.44931	0.690553					2066.97	4229.33					0.342811	0.701441						5247.37	4572.1					1.07436	0.936105					5580.29	8302.27					0.52928	0.787454
	13947	10953.8					1.22433	0.961572					2700.06	4909.11					0.447809	0.814184						7230.54	5289.57					1.4804	1.083					3763.86	9104.98					0.356994	0.86359
	12262.7	9402.34					1.07648	0.825379					2122.85	3960.48					0.352078	0.656851						5080.26	3446.29					1.04015	0.705602					27916.2	3941.78					2.6478	0.373871
	16817.8	12951					1.47634	1.1369					1703.72	4015.39					0.282565	0.665959						4751.26	4558.55					0.972786	0.933331					15364.5	4406.81					1.45729	0.417978
	19281	8523.21					1.69258	0.748205					7290.65	5108.11					1.20917	0.847188						3116.26	6030.18					0.638031	1.23464					10053.3	7663.58					0.953538	0.726876
	10349.1	8242.09					0.908485	0.723527					3730.42	4781.26					0.618696	0.792979						2951.16	4127.25					0.604229	0.845024					13146.2	4647.72					1.24689	0.440828
	19802.5	8809.77					1.73835	0.77336					6260.86	5673.94					1.03837	0.941033						3583.82	3756.07					0.733761	0.769028					9090.84	14281.7					0.862249	1.35459
	11942.5	7917.13					1.04837	0.695001					1932.1	5063.55					0.320442	0.839798						4507.75	6768.95					0.922928	1.38589					9001.21	20049.8					0.853748	1.90169
	10621.9	8919.34					0.932441	0.782979					2445.29	4820.58					0.405555	0.799502						3611.61	3770.84					0.739451	0.772051					11256.1	7387.52					1.06762	0.700692
	7892.25	5456.9					0.692816	0.479031					2516.48	9578					0.417363	1.58853						3863.74	3734.63					0.791072	0.764638					14664.1	18799.2					1.39086	1.78307
	9730.12	7627.65					0.854153	0.669588					3638.62	4837.49					0.603472	0.802306						3737.67	3527.58					0.76526	0.722247					16659.4	12216.5					1.58011	1.15871
	16600.1	6752.01					1.45723	0.592721					1518.7	7973.2					0.251879	1.32237						3485.19	4859.48					0.713566	0.994943					8421.08	6121.44					0.798723	0.580607
	10415.4	12626.3					0.91431	1.10839					9100.9	6060.76					1.5094	1.00519						2416.9	6753.18					0.494842	1.38267					17254.7	6017.54					1.63657	0.570752
	22924	9568.92					2.01237	0.840002					4352.6	5323.24					0.721885	0.882868						6230.26	5286.47					1.2756	1.08237					9533.18	19978.8					0.904204	1.89496
	19323	7234.45					1.69626	0.635072					7205.82	5097.09					1.1951	0.845361						7516.57	4407.51					1.53896	0.902405					15091.2	12014.6					1.43138	1.13956
	5248.08	8377.37					0.4607	0.735403					5545.59	4150.58					0.919745	0.688381						7464.44	3854.17					1.52829	0.789113					11040.9	13821.6					1.04721	1.31096
	5403.95	7586.46					0.474383	0.665973					11654	5920.84					1.93284	0.98198						7016	3992.14					1.43647	0.817361					6501.29	11460.4					0.616635	1.087
	7339.14	9274.43					0.644262	0.814151					7030.51	4599.9					1.16602	0.762901						4754.69	4807.69					0.973489	0.984341					12574.5	9510.97					1.19267	0.902098
	9033.72	5773.65					0.79302	0.506836					6884.7	5225.5					1.14184	0.866658						5139.36						1.05225						11026.2	10197.7					1.04581	0.967234
	7584.76	7542.38					0.665824	0.662104					7294.37	6090					1.20978	1.01004						5008.74						1.0255						10528.8	6330.88					0.998632	0.600472
	8468.19	12146.6					0.743375	1.06628					4992.12	7182.27					0.827952	1.19119						2764.88						0.566089						10831.4	8922.63					1.02734	0.846294
	8487.79						0.745096						5676.96	6520.75					0.941533	1.08148					Experiment 2	8773.78	5294.5			7716.41		1.13703	0.686135						7245.63						0.687234
	8147.89						0.715258						4601.4	3799.97					0.763149	0.630231						7367.26	5932.05					0.954752	0.768757						11375.3						1.07893
	6000.96						0.52679						4103.4						0.680555							6326.02	5234.2					0.819814	0.67832						10876.4						1.03161
Experiment 2	15553.8	12667.2			13068.7		1.19016	0.969279					5175						0.858282							9937.41	7097.51					1.28783	0.919795						8971.81						0.850959
	12782	10802.6					0.978064	0.8266					4442.73						0.736834							5697.06	5143.2					0.738305	0.666528						11809.8						1.12014
	29965.7	9587.36					2.29293	0.733612					6187.49						1.02621							8786.7	6211.09					1.1387	0.80492						10748.8						1.01951
	12896.2	6866.13					0.986799	0.525387					4170.18						0.691632							7992.36	7461.1					1.03576	0.966914						14802.3						1.40397
	16394.6	14302.1					1.25449	1.09438					7324.49						1.21478							8536.17	4804.09					1.10624	0.622581				Experiment 2	20612.9	27745			13788.7		1.49491	2.01215
	21232.1	10802.1					1.62465	0.826562				Experiment 2	6933.72	6453.68			7926.32		0.874772	0.814209						8192.37	7733.17					1.06168	1.00217					15465.1	15941.8					1.12157	1.15614
	18683.4	7715.12					1.42963	0.590351					8111.14	4606.86					1.02332	0.581211						9588.43	7668.47					1.2426	0.993788					35379.1	21039.1					2.5658	1.52582
	12603.4	9003					0.964392	0.688897					10874.4	4014.93					1.37194	0.506531						4887.33	4468.08					0.633369	0.579036					18354.8	18779					1.33114	1.36191
	12311.5	19219					0.942061	1.47061					9537.61	4569.05					1.20328	0.57644						10420.5	4194.96					1.35044	0.543642					20562.3	18281.5					1.49124	1.32583
	13711.2	16210.4					1.04917	1.2404					5910.45	5037.9					0.745674	0.635591						5700.54	11214.1					0.738756	1.45327					8019.85	20142.8					0.581624	1.46082
	13037	15440.5					0.997577	1.18148					5956.47	10087.2					0.75148	1.27262						5724.45	4252.39					0.741854	0.551084					17815.3	12761.1					1.29202	0.925472
	14912.3	7396.1					1.14107	0.56594					7683.84	4875.89					0.969409	0.615152						8191.52	4612.61					1.06157	0.597766					7604.95	35806.6					0.551535	2.5968
	15241.6	8025.48					1.16627	0.614099					5202.97	6310.12					0.656417	0.796097						5963.4	5928.17					0.77282	0.768255					6755.88	31702.9					0.489957	2.29919
	11580.8	8087.42					0.886148	0.618839					6427.96	5077.62					0.810964	0.640602						3700.55	6561.4					0.479569	0.850318					9101.24	14987.3					0.660049	1.08693
	15492.3	8068.19					1.18545	0.617368					8868.96	5305					1.11893	0.669289						5211.81	7299.53					0.675419	0.945974					8543.63	12683.8					0.61961	0.919868
	14845.4	10519					1.13595	0.804899					10648.3	6412.16					1.34341	0.808971						7665.35	7240.94					0.993383	0.938381					18529.2	9095.77					1.3438	0.659653
	19591.2	7929.32					1.49909	0.606741					9981.66	5412.22					1.25931	0.682816						5724.04	8745.62					0.7418	1.13338					30075.5	29008.2					2.18117	2.10376
	11615.7	10601.3					0.888817	0.811197					11120.1	5826.67					1.40294	0.735104						7656.33	7771.69					0.992214	1.00716					16446.7	18542.7					1.19277	1.34477
	11569.6	16880.9					0.885288	1.29171					10312.2	2888.43					1.301	0.36441						8617.79	8772.53					1.11681	1.13687					21816.8	23505.5					1.58222	1.70469
	17463.1	20916.7					1.33625	1.60052					12633.6	5003.37					1.59388	0.631235						8018.41	11449.2					1.03914	1.48375					16588.4	18285.5					1.20304	1.32612
	9284.5	17704.3					0.710437	1.35471					9914.39	5868.21					1.25082	0.740345						7616.08	6059.51					0.986997	0.785276					14794	28901					1.07291	2.09599
	13602.5	16771.2					1.04085	1.28331					10180.9	6495.7					1.28444	0.819511						10943	6541.62					1.41815	0.847754					14720	19688.3					1.06754	1.42786
	12479.8	27051.9					0.95494	2.06997					10193.2	6737.08					1.286	0.849964						7863.97	8036.83					1.01912	1.04152					7091.1	20914					0.514269	1.51674
	14024	11583					1.0731	0.886317					11019.7	7456.82					1.39027	0.940767						10281.7	5175.02					1.33244	0.670651					10252.2	15463.5					0.743519	1.12146
	6425.65	17345.8					0.491683	1.32727					4835.26	6616.46					0.610025	0.834745						7625.66	6346.89					0.98824	0.822519					8398.83	23742.2					0.609109	1.72186
	12461.6	16081.3					0.953544	1.23052					3626.91	7013.43					0.457578	0.884828						10507.5	5419.28					1.36171	0.702306					8971.36	20902.5					0.650631	1.51591
	11600.4	8617.98					0.887646	0.659437					5706.01	4545.77					0.719881	0.573504						9643.63	6544.46					1.24976	0.848122					17123.5	9596.56					1.24185	0.695972
	9160.81	8523.87					0.700973	0.652235					6155.93	5931.99					0.776644	0.748392						4894.62	7397.3					0.634313	0.958645					15491.8	20305					1.12351	1.47258
	12905.1	10390.8					0.987478	0.795089					4426.23	7204.57					0.558423	0.908943						9655.23	6628.11					1.25126	0.858963					11031.7	14614.2					0.800052	1.05987
	7683.79	7481.4					0.587953	0.572467					4547.02	9245.32					0.573661	1.16641						8107.06	6754.09					1.05063	0.87529					9251.41	21229.3					0.67094	1.53962
	12354.4	13280.2					0.945345	1.01618					3789.33	12502.3					0.478069	1.57732						9468.45						1.22705						11874.2	57483.3					0.861152	4.16886
	8950.98	10704.6					0.684917	0.819104					5397.2	5721.88					0.680922	0.721884						6094.02						0.789748						7181.65	40343.4					0.520835	2.92583
	7575.12	9115					0.579638	0.697468					5955.86	6294.26					0.751403	0.794097						4975.29						0.644767						7406.64	34242.4					0.537152	2.48336
	9101.36	14818.2					0.696424	1.13387					5126.51	7807.72					0.646771	0.985037						6136.45						0.795247						8860.47	23449					0.642588	1.70059
	7384.16	12107.1					0.565026	0.926419					10152	9962.99					1.28079	1.25695						10731.3						1.39071						8032.63	35528.1					0.582551	2.57661
	6828.84	10661.9					0.522534	0.815834					7375.32	7665.08					0.930486	0.967042					Experiment 3	6731.03	11609.6			6866.57		0.980261	1.69074					7622.54	44399.5					0.55281	3.21999
	10236.2						0.783261						4599.15	6899.98					0.580238	0.870515						6490.92	10773.6					0.945293	1.56899					17444.5	40986.7					1.26513	2.97248
Experiment 3	15956.9	12541.6			10603.6		1.50486	1.18277					10076.1	10987.6					1.27123	1.38622						11109.6	5630.42					1.61793	0.819976					8692.62						0.630415
	11078.6	10821.4					1.0448	1.02055					9915.84	6265.09					1.251	0.790417						6014.45	4830.74					0.875904	0.703516					8596.52						0.623446
	9146.03	15189					0.862544	1.43244					10908.6	7783.83					1.37626	0.982024						3438.2	7893.44					0.500716	1.14955					10191.5						0.739117
	11009.2	10089					1.03826	0.951477					10299.4	6838.73					1.2994	0.862788						5123.59	7959.71					0.746164	1.1592					8099.35						0.587389
	10850	10234.3					1.02324	0.965177					9074.06	7873.54					1.1448	0.993341						5215.84	9323.35					0.7596	1.35779					25399.4						1.84204
	5811.74	8126.02					0.548094	0.766349					7792.17	7329.2					0.983076	0.924666						4577.46	5354.41					0.66663	0.77978					12478.1						0.904947
	7889.59	12442.8					0.744051	1.17345					7068.41	10011.3					0.891765	1.26304						5727.78	5939.87					0.834156	0.865042					13145.1						0.95332
	7317.13	6923.62					0.690064	0.652953					8713.72	5687.99					1.09934	0.717609						5962.07	2959.36					0.868275	0.43098					12034.6						0.872785
	11099.4	9725.2					1.04676	0.917164						5846.07						0.737552						5655.54	2475.98					0.823634	0.360585					16063.9						1.165
	20717	10288.5					1.95378	0.970291						6195.22						0.781601						11492.5	2863.49					1.67369	0.417019					11695.8						0.848215
	10101.8	7734.59					0.952679	0.729434						6579.91						0.830134						10921	5501.53					1.59046	0.801205					14284.7						1.03597
	11482.2	6008.33					1.08287	0.566634						4877.87						0.615402						9198.51	8506.78					1.33961	1.23887					17437.2						1.2646
	10042	7495.84					0.947046	0.706918						8150.21						1.02825						10907.4	6353.28					1.58848	0.925249					15780.9						1.14448
	8238.49	7851.35					0.776955	0.740445						10377.2						1.30921						9602.48	6247.53					1.39844	0.909847					24787.7						1.79768
	11582.6	6295.35					1.09233	0.593702						3702.12						0.467067						11646.3	7762.59					1.69609	1.13049					5951.06						0.431589
	11266.6	7195.43					1.06253	0.678587						2842.51						0.358617						10834.9	4409.45					1.57792	0.642163				Experiment 3	9086.2	5239.83			6964.67		1.30461	0.752345
	9248.71	4863.82					0.872228	0.458697						4863.71						0.613616						10257.2	6098.69					1.49378	0.888172					10432.3	8202.85					1.4979	1.17778
	8153.03	5073.67					0.768896	0.478488						3681.16						0.464423						3423.4	6367.69					0.498561	0.927347					9494.44	5909.23					1.36323	0.848459
	8698.12	8712.22					0.820303	0.821633				Experiment 3	9575.01	4585.62			5166.81		1.85318	0.887514						4342.01	4521.14					0.63234	0.658427					6552.96	5669.39					0.940886	0.814022
	8670.95	6345.87					0.81774	0.598467					16181.2	2630.72					3.13175	0.509157						12337.9	4164.58					1.79681	0.606501					13007.9	7031.87					1.8677	1.00965
	9685.39	8737.5					0.91341	0.824016					4325.98	2087.77					0.837262	0.404073						9057.96	5304.14					1.31914	0.772459					7357.74	5615.18					1.05644	0.806238
	11051	7811.31					1.0422	0.736669					5440.55	3197.98					1.05298	0.618947						8542.18	5687.23					1.24403	0.828249					7352.19	5975.05					1.05564	0.85791
	8399.64	9026.85					0.792153	0.851304					5684.87	3113.11					1.10027	0.602521						5787.41	4887.23					0.842839	0.711742					8227.31	6258.44					1.18129	0.898598
	7828.19	12622.2					0.738262	1.19037					5422.7	3766.41					1.04953	0.728962						7037.53	3307.4					1.0249	0.481667					5095.72	5577.51					0.731653	0.800829
	15345.9	8767.98					1.44724	0.82689					8375.53	4326.03					1.62103	0.837273						3804.45	3941.05					0.554054	0.573948					6861.58	6838.53					0.985199	0.98189
	15893.5	10253.4					1.49889	0.966978					3633.92	3062.06					0.70332	0.59264						3070.57	4633.05					0.447177	0.674726					10829.4	5008.62					1.55491	0.719147
	10164.9	7690.36					0.958631	0.725263					6930.1	3946.37					1.34127	0.763793						5422.14	3610.18					0.789644	0.525763					8506.9	12143.5					1.22144	1.74359
	13026.2	9048.3					1.22847	0.853328					9279.93	3008.98					1.79607	0.582368						4423.34	4414.11					0.644185	0.642841					4084.58	15885.9					0.586472	2.28092
	7748.18	8564.23					0.730716	0.807676					4375.43	2816.34					0.846833	0.545084						8255.16	4736.79					1.20223	0.689833					3358.54	19271.1					0.482226	2.76699
		6241.14						0.588589					8761.39	1802.24					1.69571	0.348812						4059.61	8296.58					0.591214	1.20826					3908.19	9730.46					0.561145	1.39712
		6160.77						0.58101					6490.65	2366.53					1.25622	0.458025						8636.28	3282.49					1.25773	0.47804					4456.56	13643.5					0.639882	1.95896
		6635.47						0.625778					3699.36	3414.12					0.715984	0.660778						4964.85	2878.27					0.723046	0.419172					5595.15	6646.43					0.803362	0.954307
		10065.9						0.949297					4703.65	2146.61					0.910359	0.415461						5828.42	4475.83					0.848811	0.651829					5510.87	10092.3					0.791261	1.44907
		5235.16						0.493718					7926.22	3201.59					1.53406	0.619645						4723.86	4542.45					0.687951	0.661531					5450.47	7464.42					0.782589	1.07176
		6439.74						0.607319					2499.2	3881.91					0.483703	0.751316						7474.14	4935.77					1.08848	0.718811					3153.64	9201.58					0.452806	1.32118
		4130.87						0.389574					3813.84	6370.94					0.738142	1.23305						3113.36	5901.18					0.453409	0.859408					6480.42	5376.44					0.930472	0.77196
		5548.84						0.5233					3626.2	3625.64					0.701825	0.701718						4029.19	3919.47					0.586783	0.570805					3320.75	4905.45					0.4768	0.704334
		5670						0.534726					6065.38	3384					1.17391	0.65495						3764.64	4201.71					0.548256	0.611908					3908.05	6776.46					0.561125	0.972978
		6334						0.597347					2584.61	3740.49					0.500232	0.723945						11704.6	3412.74					1.70458	0.497008					6892.04	3772.87					0.989572	0.541716
		4112.36						0.387829					4039.35	2920.65					0.781787	0.565272						5755.12	3644.64					0.838136	0.53078					6056.65	6280.78					0.869626	0.901807
		3807.95						0.35912					5345.57	3237.4					1.0346	0.626576						7170.3	6476.12					1.04423	0.943138					7189.81	5888.86					1.03233	0.845534
Experiment 4	4486.03	2060.84			3926.9		1.14238	0.5248					6356.12	3767.19					1.23018	0.729114						6173.21	3599.39					0.899024	0.52419					9247.66	2934.65					1.3278	0.421363
	4629.89	3251.63					1.17902	0.82804					3653.57	3296.04					0.707122	0.637926						6556.17	2435.1					0.954796	0.354631					8778.61	17691.5					1.26045	2.54018
	4704.31	3098.41					1.19797	0.789021					2760.15	4439.35					0.534207	0.859206						6281.7	7402.55					0.914823	1.07806					5076.83	17468.3					0.728941	2.50813
	5178.89	3530.41					1.31882	0.899031					4623.91	2809.31					0.894925	0.543722						8014.21	5190.37					1.16714	0.75589					5593.61	17088.1					0.803141	2.45354
	3888.44	2502.31					0.990207	0.637223					3566.84	3975.49					0.690337	0.769428						6404.39	5321.78					0.932692	0.775027					5576.52	11605.5					0.800688	1.66634
	4123.7	2715.89					1.05012	0.691612					1378.37	4144.83					0.266773	0.802203						5850.87	6073.88					0.852081	0.884559					8314.43	20562.5					1.1938	2.9524
	4074.32	3488.93					1.03754	0.888471					1846.91	3277.01					0.357457	0.634243						8458.53	2714.02					1.23184	0.395251					5914.09	8386.98					0.849156	1.20422
	5083.74	3963.99					1.29459	1.00945					2441.49	3669.86					0.472533	0.710276						4820.69	3716.15					0.702053	0.541195					5812.53	7687.29					0.834574	1.10376
	5343.52	2705.36					1.36075	0.68893					2117.1	3634.07					0.40975	0.703349							3231.58						0.470625					10463.4	4188.46					1.50236	0.601388
	4175.82	2782.03					1.06339	0.708455					1966.73	5778.4					0.380647	1.11837							3943.59						0.574317					15061	7186.77					2.16249	1.03189
	4406.51	3574.57					1.12213	0.910278					3010.79	5377.53					0.582717	1.04078							2775.59						0.404218					9480.41	5107.89					1.36122	0.733401
	2793.99	2585.26					0.711501	0.658347					3212	4120.82					0.621659	0.797555							3152.05						0.459043					8033.49	11590.4					1.15346	1.66417
	4179.82	1656.32					1.06441	0.421789					10044.2	2259.08					1.94399	0.437228							5679.96						0.827191					18666.5	8752.73					2.68018	1.25673
	3643.64	2001.53					0.927867	0.509697					4691.05	3163.81					0.90792	0.612334							3706.96						0.539856					10613.6	14703.8					1.52392	2.1112
	3729.54	1455.33					0.949743	0.370605					8683.07	3852.19					1.68055	0.745563							5101.65						0.742969					4061.64	11956.1					0.583178	1.71668
	3822.02	1279.84					0.973291	0.325917					5218.81	3391.12					1.01006	0.656328							5650.84						0.82295					4731.38						0.67934
	4287.56	2000.38					1.09184	0.509406					2433.62	3845.53					0.471009	0.744275					Experiment 4	3765.37	5306.44			3634.59		1.03598	1.45998					5357.05						0.769176
	4074.57	1911.5					1.0376	0.486771					5316.24	3554.34					1.02892	0.687918						2964.69	5973.05					0.815689	1.64339					4394.46						0.630965
	4326.39	1931.69					1.10173	0.491912					8679.11	4037.97					1.67978	0.781521						3414.13	4756.87					0.939344	1.30878					3245.42						0.465983
	5043.07	2464.95					1.28424	0.627708					8368.29	3280.12					1.61962	0.634844						3913.99	4604.5					1.07687	1.26686					4090.76						0.587359
	3505.59	1324.29					0.892712	0.337237					2540.32	2991.61					0.49166	0.579006						5123.46	3078.51					1.40964	0.847004					5823.4						0.836135
	3896.26	1583.58					0.992199	0.403264					1944.08	2566.92					0.376263	0.496808						2244.55	3039.24					0.617551	0.8362					6204.4						0.890839
	4388.14	2274.6					1.11746	0.579236					4039.99	3994.64					0.781911	0.773135						2998.33	3511.28					0.824943	0.966075					4556.89						0.654286
	4905.81	3470.85					1.24928	0.883865						8055.48						1.55908						5489.77	3586.11					1.51042	0.986662				Experiment 4	2899.78	6410.89	4004.84		4136.09		0.701093	1.54999	0.968267
	3940.93	2083.63					1.00357	0.530604						1949.45						0.377303						4114.93	4434.91					1.13216	1.2202					3340.84	3837.96	3544.51				0.807728	0.927919	0.856971
	3820.91	4398.85					0.97301	1.12018						3299.11						0.63852						4844.18	4990.45					1.3328	1.37305					3891.48	3774.58	4334.1				0.940859	0.912597	1.04787
	3647.32	2302.21					0.928803	0.586268						2551.22						0.493771						4855.57	4894.58					1.33594	1.34667					4487.13	5295.28	4883.37				1.08487	1.28026	1.18067
	4624.6	4325.89					1.17767	1.1016						1826.7						0.353545						4713.47	6676.78					1.29684	1.83701					2648.36	2634.34	1711.13				0.640305	0.636916	0.413707
	3594.81	4840.08					0.915433	1.23254						4570.25						0.884539						3658.51	6177.71					1.00658	1.6997					3218.85	2929.28	2940.79				0.778236	0.708223	0.711007
	3187.9	3993.91					0.81181	1.01707						5900.38						1.14198						3804.65	3829.8					1.04679	1.05371					3592.99	3086.12	2907.98				0.868693	0.746145	0.703074
	2026.63	3819.62					0.516088	0.972682						2649.75						0.51284						3777.07	4001.11					1.0392	1.10084					5363.91	3532.58	2434.78				1.29686	0.854087	0.588666
	2908.94	1894.34					0.740773	0.482402				Experiment 4	7256.13	5804.62	4015.53		4210.03		1.72353	1.37876	0.953801					2769.25	4731.2					0.761916	1.30172					5163.34	3899.21	2941.9				1.24836	0.942728	0.711275
	3038.08	2277.9					0.773659	0.580077					4058.97	5098.03	5012.89				0.964118	1.21093	1.1907					2873.97	3879.15					0.790728	1.06729					3873.89	3219.8	3731.63				0.936608	0.778464	0.902213
	2420.01	2094.34					0.616265	0.533332					6005.19	5917.98	4757.96				1.4264	1.40569	1.13015					2523.09	4454.96					0.694189	1.22571					3959.6	2649.98	1902.88				0.95733	0.640697	0.460067
	3605.45	1833.49					0.918143	0.466904					3924.38	3906.24	3813.84				0.932151	0.927841	0.905893					4577.83	3953.41					1.25952	1.08772					4670.16	1931.17	5056.39				1.12913	0.466908	1.2225
	4297.63	2379.42					1.09441	0.605928					3686.91	3798.95	2700.07				0.875745	0.902357	0.641343					2795.99	4931.14					0.769274	1.35673					2930.92	2057.64	3042.96				0.70862	0.497483	0.735709
	3406.08	1991.99					0.867372	0.507269					2703.54	5224.97	2660.6				0.642165	1.24107	0.631967					4520.23	4161.47					1.24367	1.14496					2179.92	3395.18	4557.12				0.527049	0.820866	1.1018
	4330.71	2597.62					1.10283	0.661495					4346.13	2814.84	4560.27				1.03233	0.668604	1.08319					3670.85	4049.24					1.00998	1.11408					2541.74	3458.93	6025.45				0.614528	0.836279	1.4568
	3130.57	3083.53					0.797213	0.785234					1879.26	3528.65	1348.13				0.446376	0.838153	0.320218					2969.77	5363.69					0.817086	1.47574					4137.5	3821.71	4855.79				1.00034	0.923992	1.174
	3190.66	2652.86					0.812515	0.67556					3160.07	3439.41	3859.27				0.750604	0.816956	0.916685					3309.83	2891.64					0.910647	0.79559					3759.58	3737.54	5323.06				0.90897	0.903641	1.28698
	4096.58	3287.83					1.04321	0.837259					2183.87	6349.03	3351.78				0.518729	1.50807	0.796141					3731.79	3662.62					1.02674	1.00771					4296.93	2783.01	3758.23				1.03889	0.672861	0.908643
	3814.72	2045.62					0.971432	0.520925					6719	2381.11	3493.86				1.59595	0.565581	0.82989					4259.43	2822.74					1.17191	0.776631					2484.08	4350.36	4939.87				0.600587	1.05181	1.19433
	2632	2359.6					0.67025	0.600882					4995.52	1732.78	4131.34				1.18657	0.411584	0.981308					4338.12	2696.88					1.19357	0.742004					3919.72	3979.36	4601.91				0.947687	0.962108	1.11262
	4377.41	2765.82					1.11472	0.704328					4255.73	2102.59	5258.3				1.01085	0.499423	1.24899					4914.46	4854.7					1.35214	1.33569					2101.51	3868.5	3114.83				0.508092	0.935304	0.753085
		4770.05						1.21471					5460.61	3948.87	3734.86				1.29705	0.937967	0.887134					2847.23	2191.24					0.78337	0.602885					5908.82	5457.58	2540.42				1.4286	1.3195	0.614209
		1820.1						0.463495					5898.22	5077.8	4591.42				1.40099	1.20612	1.09059					4317.72	2981.42					1.18795	0.820291					3431.34	8297.67	5057.75				0.829611	2.00616	1.22283
		4532.52						1.15423					4104.68	2664.32	4417.47				0.974977	0.632849	1.04927					4848.93	6717.39					1.33411	1.84819					6097.36	7239.19	6093.87				1.47418	1.75025	1.47334
Experiment 5	5598.77	2512.54	3462.85		5190.51		1.07866	0.484064	0.667151				3355.67	1340.34	2703.12				0.797065	0.318369	0.642066					2439.58	8760.17					0.671212	2.41022					5380.85	5533.66	3752.7				1.30095	1.3379	0.907305
	2543.38	2907.1	3215.03				0.490007	0.560081	0.619406				4131.23	3527.69	2906.91				0.981282	0.837925	0.690471					2561.99	6805.74					0.704891	1.87249					8688.09	8045.08	4332.89				2.10056	1.94509	1.04758
	4992.07	2683.9	2931.47				0.961769	0.517079	0.564775				7502.77	2254.11	3746.95				1.78212	0.535415	0.890005					2640.89	6584.45					0.726601	1.81161					10476.6	9550.02	3234.61				2.53298	2.30895	0.782047
	3659.58	2407.25	2447.93				0.705053	0.463779	0.471617				5692.06	3267.1	4225.51				1.35202	0.776028	1.00368					2181.28	5629.31					0.600145	1.54882					11305.6	8653.22	4528.15				2.7334	2.09213	1.09479
	3240.54	4367.41	2137.51				0.624321	0.841423	0.41181				5456.29	4127.5	3704.35				1.29602	0.980396	0.879887					3384.52						0.931199						2605.07	5322.3	4649.1				0.629839	1.28679	1.12403
	5557.3	2644.7	2811.95				1.07067	0.509526	0.541749				7232.96	3223.64	4498.12				1.71803	0.765705	1.06843					2555.97						0.703236						2582.27	4354.56	4595.99				0.624326	1.05282	1.11119
	5658.88	4618.96	3139.04				1.09024	0.889887	0.604765				6126.46	3391.93	3995.16				1.45521	0.805677	0.948963					3987.18						1.09701						3396.03	2125.26	5292.13				0.821073	0.513833	1.2795
	3823.21	4060.88	3568.07				0.736578	0.782366	0.687423				6129.22	3780.71	2659.98				1.45586	0.898023	0.631819					3046.36						0.838158						2294.89	2311.1	2657.71				0.554845	0.558764	0.642566
	4078.14	3343.42	3798.29				0.785692	0.644142	0.731776				3378.43	4577.71	3828.18				0.802471	1.08733	0.909298				Experiment 5	14960.7	14224.9	8326.85		10721.9		1.39534	1.32672	0.77662				2561.1	3880.96	2504.74				0.619207	0.938317	0.605581
	6946.64	4967.93	2375.86				1.33833	0.957119	0.457733				5316.98	4653.67	4246.73				1.26293	1.10538	1.00872					14379.3	6915.23	6185.53				1.34111	0.644962	0.576905				2053.05	5033.84	4372.2				0.496374	1.21705	1.05708
	2255.89	4696.58	2217.14				0.434618	0.904841	0.427153				5446.65	3665.4	2966.87				1.29373	0.870635	0.704715					18715.8	9878.65	8768.85				1.74557	0.921352	0.817844				3290.08	3385.16	3510.71				0.795457	0.818445	0.8488
	4453.67	5078.87	3186.83				0.858042	0.978491	0.613972				1613.82	4440.52	3054.06				0.383327	1.05475	0.725425					10298.3	13503.3	7955				0.960491	1.25941	0.741938				3365.84	6983.08	2341.09				0.813775	1.68833	0.566015
	5280.36	4320.48	3087.37				1.01731	0.832381	0.594811				3409.07	4060.91	3085.89				0.809748	0.964579	0.732985					13014.1	12014.6	6299.89				1.21378	1.12057	0.587571					4336.01	1770.08					1.04834	0.427959
	5110.91	3172.08	2762.41				0.984665	0.611131	0.532205				3379	3726.58	2350.84				0.802607	0.885167	0.558389					10009.9	13219.1	10161.3				0.933591	1.23291	0.947717					4765.03	2037.57					1.15206	0.492632
	5655.2	3451.18	3250.7				1.08953	0.664902	0.626278				3755.82	2169.44	3569.27				0.892112	0.515303	0.847801					10764.2	5948.6	7046.92				1.00395	0.554808	0.657245					4934.96	2489.78					1.19315	0.601964
	4212.05	3051.2	4431.79				0.81149	0.587843	0.853825				2568.06	4314.98	2714.36				0.609986	1.02493	0.644735					8018.75	16692.4	7354.1				0.747884	1.55684	0.685894					2718.94	3259.55					0.65737	0.788076
	5237.07	4289.47	4622.32				1.00897	0.826407	0.890533				2295.07	3917.58	2279.28				0.545142	0.930534	0.541394					14337	11805.7	7556.59				1.33716	1.10108	0.70478						3250.31						0.785841
	6300.81	4534.2	4465.49				1.21391	0.873557	0.860319				1652.7	2691.74	3117.27				0.392562	0.639363	0.740439					10366.7	7774.46	6590.66				0.966869	0.7251	0.614691						1591.17						0.384704
	5092.04	3964.17	4464.99				0.98103	0.763735	0.860222				1762.65	3525.03	1790.36				0.418678	0.837293	0.425259					10058	16576.5	6868.9				0.938075	1.54604	0.640641						3519.28						0.850872
	5915.73	3937.94	4414.6				1.13972	0.758681	0.850513				1564.96	3827.3					0.371721	0.909091						13113.1	14590.6	6048.89				1.22302	1.36082	0.564161						4425.02						1.06986
	6336.89	4213.87	4078.96				1.22086	0.811842	0.78585				2194.63						0.521286							11469.5	10824.7	8004.86				1.06973	1.00958	0.746589						3480.85						0.841579
	4598.35	3482.19	5325.2				0.885914	0.670876	1.02595				4199.8						0.99757							10305.9	11225.5	8815.55				0.9612	1.04697	0.822199						4212.18						1.0184
	2882.56	3443.68	2892.8				0.555352	0.663457	0.557326				4863.07						1.15511							8604.67	16157.4	5590.4				0.802531	1.50695	0.521399						2838.39						0.68625
	3088.68	4149.51	4858.47				0.595062	0.799442	0.936029				4756.34						1.12976							8112.82	10783.1	6110.14				0.756658	1.00571	0.569874						2849.73						0.688991
	6146.57	2805.94	2670.37				1.1842	0.54059	0.514471				4726.38						1.12265							9366.39	10533.3	9196.1				0.873575	0.982412	0.857692						2711.96						0.655683
	3691.79	4485.29	3936.22				0.711257	0.864134	0.758349				3453.18						0.820226							8575.58	8675.5	5388				0.799818	0.809137	0.502523			Experiment 5	3638.7	10734.4	2288.78		4396.81		0.827575	2.4414	0.520555
	4935	4454.48	2726.87				0.950774	0.858197	0.525357				4429.95						1.05224							12472.5	10702.7	6097.14				1.16327	0.998206	0.568662				4874.21	6321.08	1549.32				1.10858	1.43765	0.352373
	5403	3088.44	2974.44				1.04094	0.595018	0.573054			Experiment 5	3690.79	2615.08	2105.69		3057.31		1.2072	0.855354	0.688741					9228.09	15537.9	3770.46				0.860676	1.44917	0.351659				3139.14	14892.6	3378.63				0.713958	3.38712	0.768426
	3806.91	5563.67	2075.9				0.733438	1.07189	0.399941				6069.67	4012.85	2217.91				1.9853	1.31255	0.725445					9879.4	13713.6	5367.39				0.921422	1.27903	0.5006				2100.87	13484.4	3345.92				0.477817	3.06687	0.760988
	4728.06	5075.99	2214.62				0.910905	0.977937	0.426668				3252.09	3439.79	3254.13				1.06371	1.1251	1.06438					7596.55	10254	10300.7				0.708507	0.956362	0.960714				2773.09	9460.7	3169.15				0.630704	2.15172	0.720784
	6182.65	5483.07	2177.35				1.19115	1.05636	0.419487				2182.69	4570.84	3265.2				0.713925	1.49505	1.068					12459.1	10564.1	7877.38				1.16203	0.985283	0.734699				4399.01	5144.44	2879.08				1.0005	1.17004	0.654809
	5602.04	7876.41	3197.2				1.07928	1.51746	0.61597				2956.18	2532.98	3360.38				0.966922	0.8285	1.09913					8912.7	11636.9	12888				0.83126	1.08534	1.20203				4425.48	6090.38	2253.63				1.00652	1.38518	0.51256
	4827.87	4581.81	2340.59				0.930134	0.882729	0.450936				5644.04	3612.51	2928.04				1.84608	1.1816	0.95772					12531.3	9904.02	8649.92				1.16876	0.923718	0.806752				4504.28	5246.35	1890.35				1.02444	1.19322	0.429935
	8756.01	5515.97	2366.24				1.68693	1.0627	0.455879				5185.13	4765.78	2489.87				1.69598	1.55882	0.814398					12980.8	9463.99	11522.8				1.21068	0.882677	1.0747				2634.31	5613.57	2658.62				0.59914	1.27674	0.60467
	6688.51	7398.78	1813.9				1.2886	1.42544	0.349465				2891.61	2855.12	2300.99				0.945802	0.933867	0.752621					11394.7	12373.4	7528.16				1.06275	1.15403	0.702128				4196.68	4954.55	3126.15				0.954481	1.12685	0.711003
	5606.62	5011.49	2792.05				1.08017	0.965511	0.537914				4543.25	2222.46	2188.44				1.48603	0.726934	0.715805					10997.4	8795	6351.46				1.0257	0.820283	0.592381				3265.71	6536.25	1565.72				0.742745	1.48659	0.356104
	7739.09	5939.62	1994.83				1.49101	1.14432	0.384323				2573.25	5974.57	2498.11				0.841673	1.95419	0.817096					8089.65	5532.95	7969.4				0.754497	0.516041	0.743282				4075.51	4715.26	4629.32				0.926924	1.07243	1.05288
	7619.29	5370.78	1919.32				1.46793	1.03473	0.369775				2312.2	3766.12	1499.51				0.756288	1.23184	0.490468					9710.67	7108.99	5548.66				0.905684	0.663034	0.517506				3378.97	4589.69	4860.41				0.768503	1.04387	1.10544
	6482.89	5650.86	2637.09				1.24899	1.08869	0.508061				2221.2	3850.19	2098.25				0.72652	1.25934	0.686306					10216.4	6995.42	5676.16				0.952848	0.652441	0.529398				3059.49	3199.97	3900.55				0.695842	0.727792	0.88713
	5394.26		2673.8				1.03925		0.515132				3372.68	2252.88	3158.55				1.10315	0.736884	1.03311					12571.2	12996.3	4908.13				1.17247	1.21212	0.457766				5748.19	5840.63	3684.41				1.30735	1.32838	0.837973
	6015.74		2511.74				1.15899		0.48391				4838.19	3238.53	1411.95				1.5825	1.05927	0.461827					10735.4	12649.8	7614.36				1.00125	1.1798	0.710168				8408.9	3575.77	4831.81				1.9125	0.813264	1.09893
	5856.3		1740.87				1.12827		0.335395				5558.76	3567.86	1311.09				1.81819	1.16699	0.428836					5551.93	9746.62	7885.82				0.517811	0.909037	0.735486				8945.25	3795.74	1759.58				2.03448	0.863293	0.400194
			4428.81						0.853251				1907.5	3822.7	1938.15				0.623915	1.25035	0.633941					5468.61	8169.02	4518.87				0.510041	0.7619	0.421461				6332.41	3876.16	3195.16				1.44023	0.881584	0.7267
Experiment 6	1874.58	3353.9	3714.64		2674.21		0.700985	1.25417	1.38906				3354.17	3253.63	2128.21				1.0971	1.06421	0.696107						5930.15	4002.21					0.553087	0.373274				6783.69	4586.6	2269.64				1.54287	1.04316	0.516202
	2441.56	4310.28	2854.67				0.913002	1.6118	1.06748				3023.48	4228.52	3267.07				0.988935	1.38309	1.06861						8658.22	8875.92					0.807526	0.82783				4888.62	2268.47	3199.68				1.11185	0.515934	0.727727
	4138.82	4264.67	3175.63				1.54768	1.59474	1.1875				2692.08	3255.06	3744.18				0.880538	1.06468	1.22467						9377.62	3224.07					0.874622	0.300699				4398.12	3659.17	2327.25				1.0003	0.832232	0.529305
	4668.59	4091.08	2882.25				1.74578	1.52983	1.0778				3699.77	3214	3160.37				1.21014	1.05125	1.03371						10858.6	6158.28					1.01275	0.574364				3153.94	2267.61	3219.41				0.717324	0.515739	0.732213
	2574.09	3787.83	1709.59				0.962562	1.41643	0.639289				2939.75	3544.13	2372.1				0.96155	1.15923	0.775878						10302.3	4422.32					0.960864	0.412457				4050.66	2265.81	2797.72				0.921272	0.515329	0.636307
	3084.12	3541.78	1874.87				1.15328	1.32442	0.701092				3691.48	2970.28	3128.34				1.20743	0.971535	1.02323						8040.24	5703.54					0.749889	0.531952				4180.91	5851.48	2828.59				0.950896	1.33085	0.643327
	2791.1	3366.09	2117.97				1.04371	1.25872	0.792				2486.05	3470.19	3549.51				0.813149	1.13505	1.16099						7589.92	5281.49					0.707889	0.492588				3215.16	7803.45	3179.31				0.731247	1.7748	0.723094
	2516.06	3483.42	1724.89				0.940859	1.3026	0.64501				2416.82	3202.41	3735.18				0.790505	1.04746	1.22172						9655.41	4431.12					0.900531	0.413277				4420.22	6815.92	4190.94				1.00532	1.55019	0.953177
	2828.09	2793.15	2580.93				1.05754	1.04448	0.965119				2123.33	2545.41	3494.58				0.69451	0.832564	1.14302						5254.05	5979.27					0.490029	0.557668				5195.58	6403.84	3624.79				1.18167	1.45647	0.824412
	2534.12	1545.46	1457.26				0.947615	0.577913	0.544929				2047.42	4032.53	2608.03				0.669682	1.31898	0.853047						5668.44	6081.34					0.528679	0.567188				5195.12	6396.72	5220.52				1.18156	1.45485	1.18734
	4740.59	1664.68	2204.2				1.77271	0.622493	0.824243				1863.99	4016.6	2720.5				0.609685	1.31377	0.889834						6862.88	4079.07					0.64008	0.380442				3350.01	7029.68	3611.04				0.761917	1.59881	0.821286
	3243.47	3059.76	2431.4				1.21287	1.14417	0.909204				2102.03	3640.68	3452.7				0.687544	1.19081	1.12933				Experiment 6	9473.6	7773.21	3586.3		6338.23		1.49467	1.2264	0.56582				5935.98	5596.88	4328.17				1.35006	1.27294	0.984388
	3983.77	3045.37	1562.47				1.4897	1.13879	0.584275				1120.89	3123.36	3030.78				0.366626	1.02161	0.991324					9115.07	7101.92	3324.86				1.43811	1.12049	0.524571				5301.5	4531.97	4151.65				1.20576	1.03074	0.944241
	3254.39	1871.9	958.186				1.21696	0.699983	0.358306				1454.68	1992.94	2521.11				0.475806	0.651861	0.824617					9303.62	10837.9	5303.35				1.46786	1.70993	0.836724				3226.51	7328.7	8019.32				0.733829	1.66682	1.82389
	3099.08	1642.36	5326.79				1.15888	0.614149	1.99191				1718.22	3105.97	2430.1				0.562003	1.01592	0.794849					8160.47	7055.04	4527.03				1.2875	1.11309	0.714241				4704.28	4689.27	4070.17				1.06993	1.06651	0.925709
	3675.86	2143.77	4441.05				1.37456	0.801646	1.6607				1900.47	3733.17					0.621614	1.22106						6894.94	6422.14	3181.36				1.08783	1.01324	0.501932				2927.2	7443.45	4529.58				0.665756	1.69292	1.0302
	2023.09	2358.35	5147.13				0.756519	0.881887	1.92473					2673.78						0.874553						5818.42	6412.71	4563.07				0.917987	1.01175	0.719927				4831.13	6302.44	4601.01				1.09878	1.43341	1.04644
	2655.51	2393.84	3844.46				0.993009	0.895158	1.4376					1710.04						0.559329						8443.48	5789.95	3090.09				1.33215	0.913495	0.487531				2626.51	4664.82	2207.43				0.597366	1.06096	0.502052
	2140.77	2332.22	2378.35				0.800525	0.872114	0.889364					3818.39						1.24894						6114.85	3916.83	5948.38				0.964756	0.617968	0.938492						3684.91						0.838087
	2732.28	1789	3783.1				1.02171	0.668983	1.41466					2330.74						0.762349						5592.7	5698.95	4479.82				0.882375	0.899139	0.706794						3764.41						0.856167
	3020.16	2166.5	2814.45				1.12937	0.810145	1.05244					3054.33						0.999025						6552.1	8515.1	4845.38				1.03374	1.34345	0.764468						2378.77						0.541022
	2577.73	2441.24	4788.84				0.963923	0.912882	1.79075					1576.58						0.515675						7826.85	8738.59	5421.57				1.23486	1.37871	0.855375						3899.35						0.886858
	2964.11	2805.22	2626.02				1.1084	1.04899	0.981981					4105.17						1.34274						6959.61	5305.34	4678.12				1.09804	0.837037	0.73808						4268.42						0.970799
	3270.93	3290.3	3615.86				1.22314	1.23038	1.35212					3957.64						1.29448						5062.96	4682.18	5525.95				0.798797	0.73872	0.871844						1833.56						0.417019
	3372.15	1837.09	2820.74				1.26099	0.686966	1.05479					3249.63						1.0629						6610.34	5107.18	3378.02				1.04293	0.805773	0.532959						3817.89						0.868332
	1461.54	1624.33	3070.66				0.546531	0.607406	1.14825					3502.68						1.14567						4619.73	4724.7	3524.87				0.728867	0.745429	0.556128						4160.76						0.946312
	2843.39	2422.01	2515.88				1.06326	0.905692	0.940793					2991.61						0.978512						6123.77	4926.25	5514.65				0.966163	0.777227	0.870061						4751.41						1.08065
	2072.22	1783.23	3693.34				0.774889	0.666826	1.3811			Experiment 6	1125.49	1136.06	1607.25		2114.78		0.532205	0.537202	0.760009					5862.07	3399.76	5904.5				0.924874	0.536389	0.931569						2807.42						0.638512
	2260.34	2456.55	2873.43				0.845238	0.91861	1.0745				902.542	1397.02	2102.25				0.426779	0.660601	0.994075					5381.39	6514.47	5744.07				0.849035	1.0278	0.906256						4719.92						1.07349
	2455.7	2482.6	3107.78				0.918289	0.928349	1.16213				1486.78	1058.38	1622.14				0.703046	0.500468	0.767049					4729.09	3604.85	6309.55				0.746121	0.568746	0.995474						2668.9						0.607008
	2866.86	2568.92	2615.74				1.07204	0.960626	0.978136				1718.26	782.041	1667.46				0.812503	0.369798	0.788482					8288.36	4538.83	6558.22				1.30768	0.716103	1.03471						3587.62						0.815959
	2139.7	2535.25	2829.64				0.800124	0.948036	1.05812				1432.26	542.075	1330.51				0.677265	0.256327	0.629148					5914.09	5302.09	4708.12				0.933081	0.836524	0.742812						2733.08						0.621605
	2525.91	2083.97	1824.68				0.944544	0.779283	0.682327				1639.1	607.334	1685.32				0.775068	0.287186	0.796924					9798.98	6096.89	6912.05				1.54601	0.961923	1.09053						4368.18						0.993487
	2273.13	2342.41	2420.8				0.850018	0.875926	0.905238				1842.22	664.379	1974.84				0.871116	0.31416	0.933828					6823.56	5377.89	7206.64				1.07657	0.848483	1.13701			Experiment 6	3392.57	3698.89	5596.36		3353.47		1.01166	1.103	1.66883
	2094.23	2108.7	1927.62				0.78312	0.788532	0.720818				1144.35	726.039	2387.54				0.54112	0.343317	1.12898					7490.13	5251.02	6280.11				1.18174	0.828467	0.990829				2746.85	4134.14	4998.32				0.819107	1.2328	1.49049
	2179.03	1741.42	2857.67				0.814831	0.651192	1.0686				2510	1475.32	2414.07				1.18689	0.697626	1.14152					6581.79	4443.8	5653.23				1.03843	0.70111	0.891926				4313.61	4296.6	3008.37				1.28631	1.28124	0.897091
	2932.15	1929.33	2275.29				1.09645	0.721459	0.850827				3074.52	805.338	1528.11				1.45383	0.380815	0.722587					7588.98	3161.23	7526.12				1.19733	0.498755	1.18742				4349.21	5312.67	2960.74				1.29693	1.58423	0.882889
	1959.63	2653.89	1420.94				0.732788	0.992402	0.531351				3563.79	1997.88	1626.03				1.68518	0.944726	0.768889					3502.54	6078.29	2863.15				0.552605	0.958988	0.451727				3363.19	6175.25	3342.54				1.0029	1.84145	0.996743
	1970.39	1876.3	2382.02				0.736813	0.701626	0.890739				1708.5	970.326	1939.58				0.807889	0.458832	0.917156					5789.78	6767.02	4339.62				0.91347	1.06765	0.684673				2747.13	4750.79	2106.22				0.819192	1.41668	0.628071
	2544.16	1642.43	2508.86				0.951367	0.614175	0.938169				2441.76	692.531	2191.1				1.15462	0.327472	1.03609					7625.16	3846.72	4117.9				1.20304	0.606908	0.649691				4917.85	4371.16	4719.59				1.4665	1.30348	1.40738
	1860.6		2896.7				0.695758		1.0832				1739.91	1130.73	2461.32				0.822738	0.534679	1.16387					8263.85	3768.96	3848.31				1.30381	0.594639	0.607158				2589.88	4627.62	3288.01				0.772299	1.37995	0.98048
	2309.56		2418.05				0.863643		0.904211				1393.79	792.27	1733.05				0.659073	0.374635	0.819496					5230.7	4389.87	2230.75				0.825261	0.692601	0.351951				3441.61	2813.25	3016.86				1.02628	0.838908	0.899626
	2328.99						0.870906						2901.69	599.808	1462.59				1.3721	0.283627	0.691604					4537.14	5275.81	3199.41				0.715836	0.832378	0.50478				3642.28	4789.01	5532.38				1.08612	1.42808	1.64975
	1783.16						0.666799						1528.86	538.005	2020.98				0.722942	0.254403	0.95565					5508.94	5951.68	2186.06				0.86916	0.939013	0.344901				3684.28	4337.88	4005.7				1.09865	1.29355	1.19449
	2415.17						0.903135						1368.21	1259.13	1499.44				0.646976	0.595399	0.70903					6076.72	4003.25	4564.69				0.95874	0.631603	0.720184				1886.35	5431.89	2430.68				0.562508	1.61978	0.724827
	1532.78						0.57317						2217.03	1770.13	1972.14				1.04835	0.837029	0.932554					5806.28	7583.83	3916.38				0.916072	1.19652	0.617898				3395.3	5463.74	4044.84				1.01247	1.62928	1.20617
Experiment 7	4956.69	2439.76	2267.49		3094.27		1.60189	0.788476	0.7328				1975.93	1922.39	1674.6				0.934343	0.909027	0.791859					7413.53	4971.72	3195.34				1.16965	0.784401	0.504137				4232.05	5681.27	4247.1				1.26199	1.69415	1.26648
	3287.72	2581.45	1820.1				1.06252	0.834266	0.588214				3612.4	1770.5	1959.11				1.70817	0.837206	0.926391					6509.51	2986.44					1.02702	0.471178					3499.03	3871.66	3666.39				1.04341	1.15452	1.09331
	2745.94	4219.88	2151.32				0.887425	1.36377	0.695259				2020.58	759.815	1702.72				0.955456	0.359289	0.805154					3478.28	5226.95					0.548777	0.824669					2579.47	5272.98	3263.61				0.769196	1.57239	0.973206
	3100.33	3257.88	1144.26				1.00196	1.05287	0.369798				1373.15	2065.61	1427.12				0.649315	0.97675	0.674834					5666.52	4526.79					0.894021	0.714204					3238.19	5831.77	3701.61				0.965624	1.73903	1.10382
	2711.96	4054.54	825.296				0.876446	1.31034	0.266717				1407.95	1508.08	1520.63				0.665767	0.713116	0.71905					3581.59	5891.11					0.565076	0.929456					3688.68	5585.86	3986.49				1.09996	1.6657	1.18877
	1738.76	3105.19	2116.69				0.561929	1.00353	0.684067				1908.7	1168.64	2052.8				0.902555	0.552608	0.970692					4519.78	3915.99					0.713097	0.617836					3026.15	2858.7	6541.38				0.902394	0.852462	1.95063
	2815.61	3170.42	1095.66				0.909943	1.02461	0.354094				1895.08	1240.05	1977.64				0.896111	0.586375	0.935154					6097.28	5903.56					0.961985	0.931419					3840.02	6983.24	4303.21				1.14509	2.08239	1.28321
	3209.6	2448.06	1210.47				1.03727	0.791157	0.391197				1313.23	1277.84	2182.17				0.620976	0.604246	1.03187					5567.47	4278.81					0.878395	0.675079					3087.19	4043.36	4552.68				0.920596	1.20573	1.3576
	3176.78	2763.04	1566.47				1.02666	0.892952	0.506249				2521.02	1728.14	1064.12				1.1921	0.817175	0.503183					5248.59	3874.88					0.828083	0.611349					2915.86	5390.64	7830.64				0.869506	1.60748	2.33509
	4432.86	2791.94	2629.63				1.4326	0.902292	0.849837				1953.93	1695.04	1650.73				0.923943	0.801524	0.780572					8160.33	3699.28					1.28748	0.583646					4168.05	4351.83	5802.52				1.24291	1.29771	1.7303
	1806.01	3121.9	5284.82				0.583663	1.00893	1.70794				1176.41	1169.95	1041.73				0.556281	0.553225	0.492598					4479.24	3043.89					0.706701	0.480242					3329.64	5176.26	3872.09				0.992896	1.54356	1.15465
	2805.03	2359.1	3129				0.906521	0.762408	1.01122				1994.31	1443.81	1455.01				0.943038	0.682726	0.688019					4164.65	3653.33					0.657068	0.576396					3017.38	6070.95	4129.17				0.89978	1.81035	1.23131
	2782.62	2707.52	3991.41				0.899281	0.875009	1.28994				1743.49	1415.54	1868.92				0.824434	0.669355	0.883745					5876.46						0.927144						2163.11	4660.1	4626.91				0.645035	1.38964	1.37974
	2026.82	2810.4	3275.5				0.655024	0.908258	1.05857				2415.5	624.069	1501.49				1.1422	0.295099	0.710001				Experiment 7	3005.75	3330.32	3853.4		3402.48		0.883402	0.978793	1.13253				3030.07	5768.74	3633.09				0.903563	1.72023	1.08338
	2391.02	3267.21	2731.3				0.772724	1.05589	0.882694				2667.41	586.687	1873.76				1.26132	0.277423	0.886032					3814.64	4183.16	3901.97				1.12114	1.22945	1.1468				3690.91	5407.19	2963.48				1.10062	1.61242	0.883707
	4942.39	4121.52	2187.03				1.59727	1.33198	0.706798				1747.42	1670.41	1805.07				0.826292	0.789875	0.853549					2460.64	4010.14	3927.02				0.723192	1.17859	1.15417				2303.61	5884.37	4425.13				0.686934	1.75471	1.31957
	5611.84	4324.17	2365.01				1.81362	1.39748	0.764318				1688.05	1730.07	2278.07				0.798215	0.818087	1.07722					3459.44	4472.79	3965.72				1.01674	1.31457	1.16554				5196.7	7931.93	3247.95				1.54965	2.36529	0.968536
	4436.57	4166.95	2494.7				1.4338	1.34667	0.806233				2741.29	2272.98	2092.18				1.29626	1.07481	0.989315					2937.68	3754.07	3098.62				0.863396	1.10334	0.910695				3175.05	7014.28	3739.31				0.946795	2.09165	1.11506
	5187.49	3080.41	2926.7				1.67648	0.995519	0.945845				2316.29	1496.1	1211.86				1.09529	0.707452	0.573046					3414.3	3958.57	5481.18				1.00347	1.16344	1.61094				2659.7	5232.69	5237.91				0.79312	1.56038	1.56194
	3497.66	3726.31	2473.66				1.13037	1.20426	0.79943				2541.39	1353.73	1095.81				1.20173	0.64013	0.518167					4122.58	4053.24	3776.14				1.21164	1.19126	1.10982					7442.26	4056.26					2.21927	1.20957
	1988.1	4590.69	2954.16				0.64251	1.48361	0.954719				2449.65	1865.85	829.295				1.15835	0.882293	0.392143					2772.03	2972.62	4911.91				0.814711	0.873664	1.44363					5865.84	2896.55					1.74919	0.863747
	1670.53	2680.17	3051.95				0.539879	0.86617	0.986323				2594.34	1619.07					1.22677	0.765598						3848.53	4667.88	3870.68				1.1311	1.37191	1.13761						3186.64						0.950254
	3022.89	3582.94	2094.89				0.976931	1.15793	0.677022				2990.67	1321.99					1.41418	0.625121						4104.35	4153.05	3266.41				1.20628	1.22059	0.96001						2517.65						0.750759
	4283.76	2822.4	1603.77				1.38441	0.912135	0.518301				3282.28	1515.45					1.55207	0.716602						2993.93	5699.4	2372.53				0.879928	1.67507	0.697294
	2992.56	1924.67	3984.38				0.967129	0.622011	1.28766				1758.74	1401.09					0.831644	0.662526						3459.05	4646.08	1779.43				1.01663	1.3655	0.522981
	3122.13	1864.8	2362.24				1.009	0.602661	0.763424				2679.38	1425.52					1.26698	0.674074						2780.94	4225.36	4596.58				0.817329	1.24185	1.35095
	2766.14	1636.4	3239.53				0.893956	0.528848	1.04694				2147.75	1236.27					1.01559	0.584585						2955.12	4131.25	3433.49				0.868522	1.21419	1.00911
	3657.97	1773.9	3230.4				1.18218	0.573283	1.04399				2372.36	881.048					1.1218	0.416615						2411.37	5135.12	2756.95				0.708711	1.50923	0.810278
	2596.78	1951.63	1408.23				0.839222	0.630723	0.45511				2861.06						1.35289							3205.71	5492.93	3704.57				0.942171	1.61439	1.08879
	5422.75	2269.63	2577.98				1.75251	0.733493	0.833147				2791.58						1.32004							3002.66	4151.99	3397.68				0.882494	1.22029	0.998589
	3805.09	2948.73	2630.99				1.22972	0.952965	0.850276				2557.09						1.20915							5611.87	3946.34	3025.01				1.64935	1.15984	0.889063
	3723.42	1759.26	2213.3				1.20333	0.568553	0.71529				2288.51						1.08215							4771.56	4268.3	2943.2				1.40238	1.25447	0.865016
	3792.61	1901.84	2481.05				1.22569	0.614632	0.801819				2442.34						1.1549							5408.33	3143	2119.72				1.58953	0.923739	0.622995
	2686.92	905.737	1678.41				0.868351	0.292714	0.542423																	3688.47	3550.52	2212.27				1.08405	1.04351	0.650194
	1739.25	962.953	1964.66				0.562085	0.311205	0.634935																	3667.56	3933.75	2648.55				1.07791	1.15614	0.778419
	2439.36	734.376	2778.46				0.788348	0.237334	0.897937																	3191.54	5703.22	1539.77				0.938005	1.6762	0.452543
	1571.53	1124.44	1936.6				0.507882	0.363394	0.625865																	5214.68	6311.12	1828.06				1.53261	1.85486	0.537273
	2607.33	1559.08	2133.46				0.842632	0.503861	0.689487																	2836.11	5425.25	1649.83				0.833542	1.5945	0.48489
	2496.24	1542.52					0.806729	0.498507																		2543.35	4590.44	2369.76				0.7475	1.34915	0.696481
	2831.29	860.358					0.915008	0.278048																		2552.97	3696.36	1941.22				0.750328	1.08637	0.570532
	2145.34	622.087					0.693326	0.201045																		2480.24	3093.41	3376.72				0.728953	0.909163	0.992429
	2764.48	999.05					0.893419	0.322871																		1857.53	2622.95	2702.97				0.545936	0.770895	0.794412
	2791.55						0.902165																			3089.6	2981.83	1923.41				0.908046	0.876371	0.565296
	2587.21						0.836129																			1883.03	6039.16	1868.17				0.553428	1.77493	0.549063
	2073.38						0.67007																			3283.48	4374.55	2093.04				0.965026	1.2857	0.615151
																										4700.83	6354.09	2459.45				1.38159	1.86749	0.72284
																										3130.16	3754.39	2272.97				0.919966	1.10343	0.668033
																										2656.26	5418.29	2247.65				0.780686	1.59245	0.660593
																										3637.32	4994.14	2254.45				1.06902	1.4678	0.662592
																										3954.73	5176.48	1422.59				1.16231	1.52139	0.418103
																										4115.88	5423.83	2055.56				1.20967	1.59408	0.604138
																										3526.42	7125.08	1778.41				1.03643	2.09409	0.522682
																										3548.35	6309.4	2359.69				1.04287	1.85436	0.693522
																											4999.03						1.46923
																											6081.61						1.78741
																											4439.12						1.30467
																											3893.3						1.14425
																											5746.96						1.68905
																											4062.18						1.19389
																											5214.93						1.53269
																											5019.4						1.47522
																											6948.16						2.04209
																											3420.22						1.00522
