# Supplementary material for: Lipid kinases VPS34 and PIKfyve coordinate a phosphoinositide cascade to regulate retriever-mediated recycling on endosomes
Source: eLife journal article supplement (doi:10.7554/elife.69709), 2022-01-18
Supplement: fig7-figsupp1-data1 [file Figure7-figure supplement 1B.xlsx]

## Sheet: Sheet1
Figure 7-figure supplement 1B
Effect of Apilimod and VPS34-IN1 treatment on localization of COMMD5 on VPS35 positive compartments
Integrated density of COMMD5 in VPS35 positive compartments					Intensity of COMMD5 in VPS35 (normalized to average of DMSO)
	intensity of COMMD5 in VPS35 puncta					intensity of COMMD5 in VPS35 puncta (normalized to DMSO)
	DMSO	apilimod		DMSO average		DMSO	Apilimod
Experiment 1	14741.6	6415.16		9909.48		1.48763	0.647376
	10948.8	3839.21				1.10488	0.387428
	9621.89	6971.37				0.970978	0.703505
	13450.1	5294.59				1.3573	0.534295
	20744.3	7953.69				2.09338	0.802635
	12264.6	3546.01				1.23767	0.35784
	6401.55	6301.65				0.646003	0.635922
	8467.81	5960.54				0.854516	0.601499
	11043.9	6272.96				1.11448	0.633026
	11178.1	7633.16				1.12802	0.770289
	6962.6	7591.71				0.702621	0.766106
	8847.02	8340.44				0.892784	0.841663
	10929	6056.35				1.10289	0.611168
	9196.01	6982.73				0.928002	0.704651
	7559.93	5463.15				0.762899	0.551305
	8584.6	12162.2				0.866302	1.22733
	10447.5	9355.77				1.0543	0.944123
	7823.44	8868.11				0.789491	0.894912
	6625.58	9132.24				0.66861	0.921567
	11586.4	7807.5				1.16922	0.787882
	11136.3	10850.7				1.1238	1.09498
	11176.8	5954.88				1.12789	0.600928
	12091.3	5600.04				1.22017	0.565119
	9913.95	12134.4				1.00045	1.22453
	13931.1	7568				1.40584	0.763713
	10217.1	8947.23				1.03104	0.902896
	6112.87	10329.4				0.616871	1.04237
	10069.3	11173.7				1.01613	1.12758
	5810.98	11113.3				0.586406	1.12148
	7585.69	7586.66				0.765499	0.765596
	8758.64	10350				0.883865	1.04445
	8232.86	5286.38				0.830807	0.533467
	8499.71	4726.5				0.857736	0.476968
	8636.26	6128.6				0.871515	0.618458
	9817.94	6525.73				0.990762	0.658534
	7325.55	6088.15				0.739247	0.614376
		4979.31					0.502479
		4856.72					0.490108
		4476.01					0.451689
		5291.95					0.534029
		7696.43					0.776673
		4367.07					0.440697
Experiment 2	13099.8	7009.88		7394.72		1.77151	0.947957
	9270.24	6914.44				1.25363	0.935051
	7449.89	6104.48				1.00746	0.825519
	10299.5	6660.57				1.39282	0.900719
	14723.5	5857.6				1.99108	0.792133
	7781.76	5830.77				1.05234	0.788505
	10255.4	5279				1.38686	0.713888
	7537.19	5910.29				1.01927	0.799258
	7454.09	6071.11				1.00803	0.821007
	7297.29	5377.71				0.986825	0.727236
	7145.39	6790.85				0.966283	0.918338
	5566.89	6517.23				0.752819	0.881336
	6193.33	5047.31				0.837534	0.682557
	6793.01	5737.37				0.91863	0.775874
	5441.98	4356.31				0.735927	0.589111
	7875	4251.53				1.06495	0.574942
	6245.06	3437.61				0.84453	0.464874
	8319.89	8444.59				1.12511	1.14198
	9370.55	4426.66				1.26719	0.598625
	6748.95	3950.5				0.912672	0.534232
	8161.77	5879.92				1.10373	0.795151
	6829.97	3843.56				0.923627	0.519771
	6494.78	4354.76				0.878299	0.588901
	7527	4008.52				1.01789	0.542078
	8942.64	4795.97				1.20933	0.648566
	10790.4	8491.13				1.4592	1.14827
	4364.34	4778.54				0.590197	0.64621
	4595.85	4977.95				0.621504	0.673176
	5482.16	6210.23				0.741361	0.83982
	4319.87	4522.81				0.584183	0.611627
	9394.95	8499.02				1.27049	1.14934
	6693.02	5143.7				0.905108	0.695591
	8291.04	7948.91				1.12121	1.07494
	10815.1	6578.47				1.46254	0.889617
	7634.05	6593.5				1.03237	0.891649
	3429.02	5902				0.463712	0.798137
	3100.37	10417.2				0.419268	1.40874
	7554.92	6807.88				1.02166	0.920641
	8554.7	4452.23				1.15687	0.602082
	11051.7	6765.97				1.49454	0.914973
	4472.61	6208.98				0.604839	0.839651
	4143.96					0.560394
	5193.81					0.702368
	4906.45					0.663508
	5149.26					0.696342
Experiment 3	11165.7	3831.55		7492.73		1.4902	0.511369
	7609.47	2695.7				1.01558	0.359775
	9447.46	3617.75				1.26088	0.482835
	9026.63	5376.39				1.20472	0.717547
	10801.1	4049.04				1.44155	0.540396
	8484.34	7061.42				1.13234	0.942436
	8942.01	2166.69				1.19343	0.289173
	6616.65	6457.81				0.883076	0.861876
	8413.06	1876.31				1.12283	0.250418
	6751.7	3693.09				0.9011	0.49289
	4990.32	2542.05				0.666022	0.339269
	5487	2781.78				0.73231	0.371264
	6931.2	9253.03				0.925057	1.23493
	5202.03	4998.43				0.694277	0.667103
	6371.83	6197.33				0.850402	0.827112
	5775.68	5367.03				0.770838	0.716299
	8041.61	9047.9				1.07326	1.20756
	5827.26	7795.36				0.777721	1.04039
	7111.51	7634.61				0.949121	1.01894
	7454.32	8268.71				0.994874	1.10356
	6686.74	4491.52				0.89243	0.59945
	7182.81	9850.34				0.958637	1.31465
	8235.77	8666.5				1.09917	1.15666
	9184.89	11138.2				1.22584	1.48653
	5746.51	11409.5				0.766945	1.52274
	9874.69	10828.4				1.3179	1.44519
	11661.3	9874.67				1.55635	1.3179
	6445.85	5694.03				0.86028	0.75994
	5457.42	10811.7				0.728362	1.44295
	10613.7	7136.23				1.41653	0.952421
	8064.86	7095.12				1.07636	0.946934
	10019.4	8538.83				1.33722	1.13961
	5165.29	6010.99				0.689373	0.802243
	5717.56	8893.87				0.763081	1.187
	4014.68	5604.09				0.535809	0.747937
	3468.24	5473.13				0.462881	0.730458
	5094.56	9453.78				0.679934	1.26173
	11171.2	9684.23				1.49094	1.29248
	7960.14					1.06238
