# Supplementary material for: Lipid kinases VPS34 and PIKfyve coordinate a phosphoinositide cascade to regulate retriever-mediated recycling on endosomes
Source: eLife journal article supplement (doi:10.7554/elife.69709), 2022-01-18
Supplement: fig7-figsupp1-data1 [file Figure7-figure supplement 1D.xlsx]

## Sheet: Sheet1
Figure 7-figure supplement 1D
Effect of apilimod on endosomal localization of CCDC93
Integrated density of CCDC93 within VPS35 endosomes						Normalized intensity of CCDC93 within VPS35 endosomes
	DMSO	apilimod		avg DMSO		DMSO	apilimod
Expt1	2706.63	2002.88		2860.09		0.946344	0.700287
	4189.69	1947.98				1.46488	0.681091
	4455.08	1449.42				1.55767	0.506775
	3057.88	2205.49				1.06915	0.771127
	3384.95	2718.28				1.18351	0.950419
	1763.22	2176.7				0.61649	0.761059
	2190.54	2259.32				0.7659	0.789946
	2681.71	1450.19				0.93763	0.507043
	2774.27	2650.72				0.969993	0.926796
	2721.26	2510.5				0.95146	0.87777
	3124.84	2033.45				1.09257	0.710974
	2116.16	1974.31				0.739891	0.690295
	2066.57	5388.7				0.722555	1.8841
	2763.63	2290.76				0.966274	0.800941
	1643.63	2222.42				0.574677	0.777045
	2099.28	2904.62				0.733992	1.01557
	1661.2	3087.62				0.58082	1.07955
	2658.6	3725.17				0.929551	1.30246
	1873.01	2933.73				0.654876	1.02575
	2282.85	2408.64				0.798175	0.842156
	3184.22	3908.52				1.11333	1.36657
	2785.64	2301.81				0.973967	0.804803
	1478.54	2187.96				0.516954	0.764997
	3010.18	2465.23				1.05248	0.861941
	1553.62	2178.41				0.543205	0.761658
	3029.82	2469.65				1.05934	0.863486
	3224.88	1795.31				1.12754	0.627709
	4490.61	2708.84				1.57009	0.947118
	4883.15	3000.01				1.70734	1.04892
	2809.81	2255.84				0.982421	0.788731
	5087.09	3679.8				1.77865	1.2866
	2782.62	5984.43				0.972915	2.09239
	3800.39					1.32877
	2038.15					0.712618
	2960.12					1.03497
	2577.25					0.901106
	2307.48					0.806784
	3529.09					1.23391
	2470.18					0.863673
	3180.71					1.1121
	3865.19					1.35142
Expt2	2442.46	1343.12		3215.89		0.759497	0.417653
	3487.95	1315.26				1.0846	0.408987
	3972.26	1048.36				1.2352	0.325993
	3076.37	1199.04				0.956616	0.372848
	2851.01	4053.16				0.886537	1.26035
	4204.59	1056.04				1.30744	0.328381
	4556.48	2093.55				1.41686	0.651001
	4740.21	1701.29				1.474	0.529024
	2006.07	1918.49				0.623798	0.596567
	1547.86	1494.11				0.481317	0.464602
	1433.76	2235				0.445836	0.694985
	3800.55	2543.38				1.1818	0.790877
	2389.47	1495.02				0.74302	0.464884
	2160.27	2085.1				0.671749	0.648374
	3592.8	1236.11				1.1172	0.384375
	2394.03	2520.02				0.744438	0.783614
	2363.64	1687.53				0.734986	0.524747
	4177.47	2668.88				1.29901	0.829903
	2344.05	2711.91				0.728898	0.843283
	2837.86	1569.95				0.882448	0.488187
	2285.24	1473.83				0.710609	0.458297
	1760.46	1009.55				0.547424	0.313926
	3707.96	753.504				1.15301	0.234306
	3652.47	1315.7				1.13576	0.409126
	2712.14	1524.66				0.843355	0.474103
	3663.64	1182.5				1.13923	0.367707
	5299.58	1021.85				1.64793	0.317749
	2287.59	1143.02				0.71134	0.355429
	2133.74	843.605				0.6635	0.262324
	2891.49	1341.9				0.899124	0.41727
	4055	1603.13				1.26092	0.498503
	2475.49	3374.2				0.769769	1.04923
	3184.47	1810.13				0.99023	0.56287
	3132.66	897.84				0.974119	0.279189
	1595.47	1090.96				0.49612	0.33924
	2896.37	1574.48				0.900643	0.489594
	2848.46	1241.73				0.885745	0.386123
	2919.12	2033.98				0.907718	0.632479
	1336.14	1798.62				0.415481	0.559291
	3713.05	1615.33				1.15459	0.502296
	5262.23	2368.02				1.63632	0.736349
	4027.31					1.25232
	3715.72					1.15543
	4612.32					1.43423
	4155.88					1.29229
	4946.94					1.53828
	5496.78					1.70925
Expt3	1063.95	4497.31		2989		0.355954	1.50462
	1490.54	1203.6				0.498676	0.402676
	1300.78	2692.15				0.435187	0.900687
	1977.12	4028.47				0.661466	1.34776
	2972.81	2334.2				0.994585	0.780929
	1631.03	3024.42				0.545678	1.01185
	1254.1	4423.3				0.41957	1.47986
	2105.89	4649.17				0.704545	1.55543
	3573.56	3381.47				1.19557	1.1313
	1882.77	1751.39				0.6299	0.585945
	2078.53	2667.03				0.695392	0.892281
	3654.4	3414.36				1.22262	1.14231
	2499.92	3172.23				0.836374	1.0613
	3276.43	2143.55				1.09616	0.717146
	5505.34	3616.22				1.84187	1.20984
	1849.2	3522.3				0.618668	1.17842
	2295.65	3450.4				0.768034	1.15437
	2644.66	939.183				0.884798	0.314213
	4912.54	606.578				1.64354	0.202937
	2206.79	744.785				0.738304	0.249175
	4335.27	1025.42				1.45041	0.343066
	2298.7	689.769				0.769054	0.230769
	1947.16	840.312				0.651443	0.281135
	2991.27	736.764				1.00076	0.246492
	4267.6	1014.65				1.42777	0.33946
	3392.92	1514.06				1.13514	0.506544
	3238.88	1386.99				1.0836	0.464033
	3296.06	1010.49				1.10273	0.338069
	2240.09	1495.42				0.749446	0.500309
	1330.96	913.448				0.445286	0.305603
	2812.44	1024.27				0.940931	0.34268
	5455.88	746.344				1.82532	0.249697
	3867.06	887.217				1.29376	0.296827
	2641.61	1010.49				0.883777	0.338069
	3778.35	1650.57				1.26409	0.552216
	4426.91	1405.54				1.48107	0.470239
	2600.6	1250.01				0.870057	0.418202
	5108.43	1865.87				1.70908	0.624246
	2037.9	2679.66				0.6818	0.896506
	2121.16	1653.47				0.709655	0.553184
	1845.67	2532.62				0.617488	0.847312
	2680.34					0.896733
	2627.76					0.879143
	2620.24					0.876626
	3851.29					1.28849
	3981.81					1.33216
	3298.3					1.10348
	5419.41					1.81312
	5770.89					1.93071
