# Supplementary material for: Lipid kinases VPS34 and PIKfyve coordinate a phosphoinositide cascade to regulate retriever-mediated recycling on endosomes
Source: eLife journal article supplement (doi:10.7554/elife.69709), 2022-01-18
Supplement: fig7-figsupp2-data1 [file Figure7-figure supplement 2.xlsx]

## Sheet: Sheet1
Figure 7-figure supplement 2
	Integrated density of COMMD1 within VPs35 compartment						Normalized density of COMMD1 within VPs35 compartment
		PIKfyve sirna						PIKfyve sirna
	ctrl sirna	no transfection	PIKfyve WT		average of ctrl sirna		ctrl sirna	no transfection	PIKfyve WT
Expt1	3830.95	1600.83	1101.93		1659.06		2.30911	0.9649	0.664191
	1357.92	804.498	831.47				0.818487	0.484911	0.501168
	631.346	966.003	1898.92				0.380544	0.582258	1.14457
	1099.98	512.104	827.598				0.663015	0.308671	0.498835
	967.044	801.863	1185.1				0.582886	0.483323	0.714316
	1164.17	1126.21	1679.43				0.701706	0.678821	1.01228
	1228.69	719.223	685.257				0.740594	0.433512	0.413039
	1037.52	1878.55	1338.69				0.625362	1.1323	0.806898
	1618.37	1998.25	1141.79				0.97547	1.20444	0.688214
	916.744	1082.84	990.469				0.552567	0.65268	0.597005
	1340.71	1128.97	392.7				0.808113	0.680488	0.2367
	1089.67	932.784	1442.16				0.656798	0.562235	0.869259
	805.962	559.02	1048.41				0.485794	0.336949	0.631931
	1307.72	1779.94	1001.3				0.788228	1.07286	0.603535
	1085.51	990.99	4059.64				0.654288	0.597319	2.44695
	854.082	1178.2	747.854				0.514798	0.710158	0.450769
	1229.73	645.141	1810.49				0.741221	0.388859	1.09127
	1104.57	591.913	1287.22				0.665779	0.356776	0.775874
	961.09	1828.48	1165.38				0.579297	1.10212	0.702432
	1284.03	2308.83	1661.7				0.773951	1.39165	1.00159
	2071.35	1896.38	1342.66				1.24851	1.14304	0.80929
	3037.65	1208.65	1017.31				1.83094	0.728514	0.613184
	2733.25	2132.59	1894.98				1.64747	1.28542	1.1422
	1747.56	817.512	1642.73				1.05334	0.492755	0.990158
	2152.59	1709.6	862.313				1.29748	1.03046	0.519759
	2015.82	1303.3	758.428				1.21503	0.785561	0.457142
	1532.86	1260.15					0.923934	0.759558
	2675.4	944.92					1.6126	0.56955
	1316.28	1413.75					0.793386	0.852139
	1532.02	1795.72					0.923424	1.08237
	1493.69	1556.32					0.900322	0.938073
	2725.54	725.958					1.64282	0.437571
	2127.51	1161.05					1.28236	0.699823
	2439.72	1064.26					1.47054	0.641482
	2017.05	1155.07					1.21578	0.696215
	2637.17	1037.22					1.58956	0.625185
	2329.55	1667.01					1.40414	1.00479
	1912.97	1798.87					1.15304	1.08427
	1342.99	2134.54					0.809486	1.28659
	1802.84	820.701					1.08666	0.494677
	1863.39	1536.15					1.12316	0.925914
	3075.36	1119.05					1.85367	0.674506
	1604.67	1005.73					0.967214	0.606202
	1292.95	826.362					0.779325	0.49809
	1364.98	779.218					0.822743	0.469674
	1682.92	2063.06					1.01438	1.24351
	2335.64	1086.29					1.40781	0.654758
	1703.51	1756.74					1.02679	1.05887
	2312.93	668.914					1.39412	0.403188
	1659.56	714.831					1.0003	0.430864
	1802.38	936.851					1.08639	0.564687
	1901.39	637.397					1.14606	0.384191
	1628.81	1414.14					0.981765	0.852375
	1367.29	512.722					0.824135	0.309043
	1018.29	557.979					0.613772	0.336322
	1028.76	814.779					0.620083	0.491108
	885.44	716.62					0.533699	0.431943
	2148.92	812.827					1.29526	0.489931
	1360.26	675.203					0.819899	0.406979
	1695.54						1.02199
	1110.98						0.669643
	1458.29						0.878986
Expt 2	1033.56	1173.32	1163.54		1241.14		0.832749	0.94536	0.937478
	951.79	926.01	1163.59				0.766868	0.746097	0.937514
	2475.11	1260.67	2246.33				1.99423	1.01574	1.80989
	1360.76	1090.27	2750.06				1.09638	0.878442	2.21576
	607.233	681.861	2767.8				0.489255	0.549383	2.23005
	1131.82	634.482	1605.97				0.911919	0.51121	1.29395
	772.575	2140.32	2765.7				0.622473	1.72448	2.22835
	862.544	1511.49	2498.48				0.694962	1.21782	2.01305
	767.017	924.158	3736.55				0.617995	0.744605	3.01059
	1020.66	1309	1806.81				0.822354	1.05468	1.45577
	1226.76	1326.58	2321.05				0.988413	1.06884	1.87009
	1184.55	1547.57	713.063				0.954407	1.24689	0.574523
	990.019	1645.2	622.641				0.79767	1.32555	0.501669
	1760.76	2078.89	2057.81				1.41867	1.67498	1.658
	4178.22	1515.34	2625.95				3.36644	1.22093	2.11576
	981.343	1328.73	1534.87				0.79068	1.07057	1.23666
	2079.43	1470.64	2272.54				1.67542	1.18491	1.83101
	852.4	1811.26	2896.47				0.686789	1.45935	2.33372
	1034.12	1532.5	2190.79				0.833204	1.23475	1.76515
	644.536	1818.11	1026.24				0.51931	1.46487	0.826851
	1622.94	2071.79	1802.38				1.30762	1.66927	1.4522
	930.145	1179.56	1586.68				0.749429	0.950384	1.27841
	697.112	1441.62	2356.29				0.561671	1.16153	1.89849
	1286.2	1588.83	2144.84				1.03631	1.28013	1.72812
	1223.68	1425.45	2051.03				0.985937	1.1485	1.65254
	2288.69	2069.26	1697.23				1.84403	1.66723	1.36748
	1290.25	1952.09					1.03957	1.57282
	842.865	1272.15					0.679106	1.02499
	1064.96	1413.2					0.858053	1.13863
	793.994	1419.93					0.63973	1.14406
	1486.71	1221.13					1.19786	0.98388
	1088.17	1056.76					0.876749	0.851445
	1390.99	1532.61					1.12074	1.23484
	1247.61	1720.1					1.00522	1.3859
	1097.95						0.884631
	2019.17						1.62687
	894.695						0.720866
	1423.14						1.14664
	1061.78						0.855486
	962.613						0.775589
	969.029						0.780758
	851.767						0.686279
	1087.44						0.876166
	795.757						0.641151
	1427.3						1.14999
	1247.18						1.00487
	1115.03						0.898394
	1165.64						0.939171
	1302.58						1.04951
	956.58						0.770728
	1295.69						1.04395
	1297.54						1.04545
	1109.07						0.893587
	1771.99						1.42772
Expt3	1003.41	482.232	282.722		559.696		1.79278	0.861597	0.505135
	273.218	405.398	581.47				0.488155	0.724319	1.0389
	634.995	340.251	626.137				1.13454	0.607922	1.11871
	289.218	671.1	542.317				0.516742	1.19904	0.96895
	631.444	566.813	214.101				1.12819	1.01272	0.382531
	602.557	478.474	760.369				1.07658	0.854883	1.35854
	354.868	543.698	378.758				0.634037	0.971417	0.676721
	718.531	484.453	722.792				1.28379	0.865565	1.2914
	691.594	693.414	419.486				1.23566	1.23891	0.74949
	824.535	644.221	723.567				1.47318	1.15102	1.29279
	730.837	405.54	229.571				1.30578	0.724572	0.410171
	641.955	387.271	478.861				1.14697	0.691931	0.855574
	704.636	456.767	522.004				1.25896	0.816099	0.932657
	625.362	305.979	501.86				1.11733	0.546688	0.896666
	633.678	352.583	858.42				1.13218	0.629955	1.53373
	914.076	391.761	408.613				1.63317	0.699954	0.730063
	606.224	463.004	259.094				1.08313	0.827243	0.462919
	465.126	461.712					0.831034	0.824934
	360.757	651.395					0.644559	1.16384
	348.941	360.486					0.623448	0.644075
	360.731	719.473					0.644513	1.28547
	413.585	390.69					0.738946	0.69804
	500.078	490.793					0.893482	0.876893
	759.288	513.494					1.35661	0.917452
	591.968	697.663					1.05766	1.2465
	977.015	405.721					1.74562	0.724896
	776.149	302.983					1.38673	0.541335
	589.605	222.379					1.05344	0.397321
	509.84	304.365					0.910924	0.543805
	620.481	355.295					1.1086	0.6348
	672.986	396.798					1.20241	0.708953
	486.971	266.8					0.870064	0.476688
	483.252	575.969					0.863419	1.02908
	306.973	368.957					0.548464	0.65921
	416.749	282.735					0.744599	0.505159
	403.732	348.825					0.721342	0.623241
	434.969						0.777153
	638.401						1.14062
	577.66						1.0321
	288.74						0.515888
	483.226						0.863373
	733.433						1.31041
	490.199						0.875831
	343.815						0.614289
	432.851						0.773369
	397.34						0.709922
