# Supplementary material for: Lipid kinases VPS34 and PIKfyve coordinate a phosphoinositide cascade to regulate retriever-mediated recycling on endosomes
Source: eLife journal article supplement (doi:10.7554/elife.69709), 2022-01-18
Supplement: fig7-figsupp3-data1 [file Figure7-figure supplement 3A.xlsx]

## Sheet: Sheet1
Figure 7-figure supplement 3A
Effect of apilimod on phosphoinositide lipid levels
Values are percentage of total phosphoinositides
		Apilimod
PI3P		Time (Mins)	Experiment 1	Experiment 2	Experiment 3
		0	0.261	0.264	0.223
		2.5	0.244	0.224	0.29
		5	0.374	0.386	0.31
		30	0.499	0.641	0.505
		120	0.78	0.841	0.876
PI5P		Time (Mins)	Experiment 1	Experiment 2	Experiment 3
		0	0.46	0.678	0.692
		2.5	0.63	0.58	0.52
		5	0.382	0.382	0.386
		30	0.232	0.23	0.23
		120	0.194	0.234	0.356
PI3,5P2		Time (Mins)	Experiment 1	Experiment 2	Experiment 3
		0	0.059	0.06	0.054
		2.5	0.03	0.033	0.02
		5	0.018	0.018	0.021
		30	0.017	0.02	0.022
		120	0.013	0.013	0.008
PI4P		Time (Mins)	Experiment 1	Experiment 2	Experiment 3
		0	5.603	5.839	5.05
		2.5	5.519	5.588	5.32
		5	4.712	5.236	4.385
		30	5.357	5.314	4.8
		120	5.502	6.711	6.602
PI4,5P2		Time (Mins)	Experiment 1	Experiment 2	Experiment 3
		0	5.508	5.225	4.595
		2.5	5.197	4.872	5.47
		5	5.736	5.052	5.345
		30	4.659	4.991	5.236
		120	4.365	4.36	4.584
PI		Time (Mins)	Experiment 1	Experiment 2	Experiment 3
		0	88.339	88.275	89.732
		2.5	88.694	88.993	88.64
		5	88.97	89.118	89.746
		30	89.351	88.919	89.323
		120	89.243	87.957	87.752
