# Supplementary material for: Lipid kinases VPS34 and PIKfyve coordinate a phosphoinositide cascade to regulate retriever-mediated recycling on endosomes
Source: eLife journal article supplement (doi:10.7554/elife.69709), 2022-01-18
Supplement: fig7-figsupp3-data1 [file Figure7-figure supplement 3B.xlsx]

## Sheet: Sheet1
Figure 7-figure supplement 3B
Effect of VPS34-IN1 on phosphoinositide lipid levels
Values are percentage of total phosphoinositides
	VPS34-IN1
PI3P	Time (Mins)	Experiment 1	Experiment 2	Experiment 3
	0	0.302	0.234	0.254
	5	0.154	0.15	0.137
	30	0.165	0.146	0.137
	60	0.165	0.126	0.114
PI5P	Time (Mins)	Experiment 1	Experiment 2	Experiment 3
	0	0.074	0.062	0.053
	5	0.041	0.044	0.034
	30	0.039	0.04	0.029
	60	0.04	0.034	0.025
PI3,5P2	Time (Mins)	Experiment 1	Experiment 2	Experiment 3
	0	0.367	0.284	0.271
	5	0.197	0.177	0.202
	30	0.131	0.156	0.151
	60	0.162	0.108	0.165
PI4P	Time (Mins)	Experiment 1	Experiment 2	Experiment 3
	0	4.203	3.337	3.195
	5	3.234	2.935	3.151
	30	3.1	2.614	2.77
	60	3.138	3.289	2.803
PI4,5P2	Time (Mins)	Experiment 1	Experiment 2	Experiment 3
	0	4.484	3.48	3.38
	5	3.785	3.39	3.111
	30	4.012	3.626	3.265
	60	4.158	3.741	3.176
PI	Time (Mins)	Experiment 1	Experiment 2	Experiment 3
	0	90.57	92.603	92.847
	5	92.589	93.303	93.364
	30	92.553	93.418	93.648
	60	92.337	92.702	93.717
