# Supplementary material for: Lipid kinases VPS34 and PIKfyve coordinate a phosphoinositide cascade to regulate retriever-mediated recycling on endosomes
Source: eLife journal article supplement (doi:10.7554/elife.69709), 2022-01-18
Supplement: fig7-figsupp4-data1 [file Figure 7-figure supplement 4B.xlsx]

## Sheet: Sheet1
Figure 7-figure supplement 4B
Effect of VPS34-IN1 treatment on localization of COMMD1, VPS35L, FAM21 and SNX17 on VPS35 positive compartments
Integrated density of COMMD1 in VPS35 positive compartments						Intensity of COMMD1 in VPS35 (normalized to average of DMSO)						Integrated density of VPS35L in VPS35 positive compartments						Intensity of VPS35L in VPS35 (normalized to average of DMSO)							Integrated density of FAM21 in VPS35 positive compartments						Intensity of FAM21 in VPS35 (normalized to average of DMSO)						Integrated density of SNX17 in VPS35 positive compartments						Intensity of SNX17 in VPS35 (normalized to average of DMSO)
	DMSO	VPS34-IN1		DMSO avg		DMSO	VPS34-IN1						DMSO	VPS34-IN1		average of DMSO		DMSO	VPS34-IN1							DMSO	VPS34-IN1				DMSO	VPS34-IN1						DMSO	VPS34-IN1		average of DMSO		DMSO	VPS34-IN1
Experiment 1	11568.1	12767.5		11391.5		1.0155	1.12079					Experiment 1	8399.33	4863.45		6029.49		1.39304	0.80661						Experiment 1	3486.67	3740.22		4884.18		0.71387	0.765783					Experiment 1	6445.11	5574.51		10543.2		0.611307	0.528731
	10903.6	8250.05				0.957162	0.724226						11742.9	7629.64				1.94758	1.26539							3344.57	3442.32				0.684776	0.704791						6362.39	5870.15				0.60346	0.556773
	13506.3	14325.8				1.18564	1.25758						9808.99	5749.94				1.62684	0.953637							2375.42	3145.98				0.48635	0.644116						7670.6	8673.57				0.727541	0.822672
	9294.64	16965.8				0.815925	1.48934						8711.69	7050.81				1.44485	1.16939							2162.59	2304.17				0.442774	0.471762						5942.97	7801.81				0.56368	0.739987
	9098.75	6180.04				0.798729	0.542511						7379.38	3740.88				1.22388	0.620431							3436.99	3691.8				0.703698	0.75587						4387.28	5041.86				0.416125	0.478211
	7232.62	11594.5				0.634911	1.01782						6046.68	4794.61				1.00285	0.795194							4437.75	3062.47				0.908597	0.627018						4148.44	5991.76				0.393472	0.568307
	13197.6	15502.1				1.15854	1.36084						11162.5	6294.82				1.85132	1.04401							5665.52	3415.05				1.15997	0.699206						6280.55	4809.34				0.595698	0.456156
	7966.85	10852.3				0.699365	0.952666						6872.38	6598.94				1.1398	1.09445							4891.55	3107.47				1.00151	0.636233						21949.7	8419.06				2.08189	0.798532
	6341.39	14637.6				0.556675	1.28496						8696.66	2544.21				1.44235	0.421961							4768.94	4284.95				0.976405	0.877313						12471.9	8903.04				1.18294	0.844437
	10629.9	12550.8				0.933143	1.10176						3437.84	3726.28				0.570172	0.618009							3593.01	3299.95				0.735643	0.675642						16091.4	6122.75				1.52623	0.580731
	10722.5	22538.5				0.941265	1.97853						8338.6	4699.76				1.38297	0.779463							3480.24	4092.63				0.712554	0.837937						10069.9	5150.2				0.955115	0.488487
	16106	11503.4				1.41385	1.00982						6050.39	6225.44				1.00347	1.0325							15976.8	4132.25				3.27113	0.846048						6227.44	6628.52				0.59066	0.628703
	7758.23	11989.8				0.681052	1.05252						7527.46	5660.68				1.24844	0.938832							7092.98	2299.71				1.45224	0.470848						9389.12	4178.77				0.89054	0.396348
	16580.4	9298.3				1.4555	0.816246						8866.86	6507.61				1.47058	1.0793							6263.47	3648.73				1.2824	0.74705						7042.31	4304.64				0.66795	0.408287
	9229.48	10428.6				0.810205	0.915467						8586.67	5103.59				1.42411	0.846439							5375.49	2731.26				1.10059	0.559206						5775.93	7569.55				0.547836	0.717958
	16509.9	11825.9				1.44931	1.03813						2066.97	3404.69				0.342811	0.564674							5247.37	2770.43				1.07436	0.567225						5580.29	4288.86				0.52928	0.40679
	13947	11774.9				1.22433	1.03365						2700.06	5382.39				0.447809	0.892677							7230.54	2610.76				1.4804	0.534534						3763.86	8189.64				0.356994	0.776772
	12262.7	12630.8				1.07648	1.10878						2122.85	2797.4				0.352078	0.463954							5080.26	3128.95				1.04015	0.64063						27916.2	3722.4				2.6478	0.353063
	16817.8	11204.6				1.47634	0.983593						1703.72	2894.77				0.282565	0.480102							4751.26	4103.15				0.972786	0.84009						15364.5	9147.22				1.45729	0.867596
	19281	7109.46				1.69258	0.624099						7290.65	2318.01				1.20917	0.384445							3116.26	2471.73				0.638031	0.506069						10053.3	4594.83				0.953538	0.435811
	10349.1	8886.65				0.908485	0.78011						3730.42	2051.1				0.618696	0.340178							2951.16	2535.8				0.604229	0.519187						13146.2	6795.92				1.24689	0.64458
	19802.5	6382.31				1.73835	0.560267						6260.86	2858.31				1.03837	0.474056							3583.82	3515.66				0.733761	0.719806						9090.84	7329.3				0.862249	0.69517
	11942.5	6513				1.04837	0.57174						1932.1	2608.94				0.320442	0.432697							4507.75	2455.14				0.922928	0.502673						9001.21	5486.98				0.853748	0.52043
	10621.9	7391.68				0.932441	0.648874						2445.29	1941.95				0.405555	0.322076							3611.61	3455.02				0.739451	0.70739						11256.1	13184.7				1.06762	1.25055
	7892.25	12968.1				0.692816	1.1384						2516.48	2395.8				0.417363	0.397348							3863.74	3154.75				0.791072	0.645911						14664.1	8794.45				1.39086	0.834137
	9730.12	7870.79				0.854153	0.690933						3638.62	2248.65				0.603472	0.372942							3737.67	2503.63				0.76526	0.5126						16659.4	21631.5				1.58011	2.05171
	16600.1	15514.3				1.45723	1.36191						1518.7	3576.82				0.251879	0.593221							3485.19	1900.5				0.713566	0.389114						8421.08	11785.2				0.798723	1.1178
	10415.4	13031.1				0.91431	1.14393						9100.9	2487.17				1.5094	0.412501							2416.9	2338.93				0.494842	0.478879						17254.7	5238.46				1.63657	0.496858
	22924	9220.72				2.01237	0.809435						4352.6	2426.28				0.721885	0.402402							6230.26	2142.11				1.2756	0.438582						9533.18	5994.83				0.904204	0.568598
	19323	13517.7				1.69626	1.18664						7205.82	3370.9				1.1951	0.559069							7516.57	1910.5				1.53896	0.391161						15091.2	9400.58				1.43138	0.891627
	5248.08	19357.4				0.4607	1.69928						5545.59	3850.65				0.919745	0.638637							7464.44	2015.04				1.52829	0.412565						11040.9	7534.24				1.04721	0.714609
	5403.95					0.474383							11654	5991.6				1.93284	0.993717							7016	1544.39				1.43647	0.316203						6501.29	6244.1				0.616635	0.592241
	7339.14					0.644262							7030.51	3102.07				1.16602	0.514483							4754.69	1656.75				0.973489	0.339208						12574.5	4336.97				1.19267	0.411353
	9033.72					0.79302							6884.7	3588.67				1.14184	0.595187							5139.36	2282.27				1.05225	0.467278						11026.2	4151.17				1.04581	0.393731
	7584.76					0.665824							7294.37	3367.15				1.20978	0.558447							5008.74	2007.19				1.0255	0.410957						10528.8	5552.25				0.998632	0.52662
	8468.19					0.743375							4992.12	3779.69				0.827952	0.626868							2764.88	2532.84				0.566089	0.51858						10831.4	9837.54				1.02734	0.933072
	8487.79					0.745096							5676.96	3979.76				0.941533	0.660049								1983.26					0.406059							7052.13					0.668881
	8147.89					0.715258							4601.4	3729.4				0.763149	0.618527								2540.73					0.520195							4274.23					0.405402
	6000.96					0.52679							4103.4	2836.75				0.680555	0.470479								2101.23					0.430212							6821.77					0.647032
Experiment 2	15553.8	9785.61		13068.7		1.19016	0.748782						5175	5138.31				0.858282	0.852198								3664.12					0.750201							4437.87					0.420924
	12782	14660.3				0.978064	1.12178						4442.73	4454.44				0.736834	0.738776								4041.1					0.827385							4743.03					0.449868
	29965.7	9625.16				2.29293	0.736504						6187.49	2558.03				1.02621	0.424253								3886.27					0.795685					Experiment 2	20612.9	5028.63		13788.7		1.49491	0.364692
	12896.2	9205.56				0.986799	0.704397						4170.18	1838.06				0.691632	0.304845								3616.61					0.740475						15465.1	6490.72				1.12157	0.470727
	16394.6	9197.67				1.25449	0.703794						7324.49	3757.84				1.21478	0.623244								2403.11					0.492019						35379.1	6906.1				2.5658	0.500852
	21232.1	9056.52				1.62465	0.692993							4048.79					0.671498								3316.34					0.678997						18354.8	7278.69				1.33114	0.527873
	18683.4	6374.86				1.42963	0.487796							2855.92					0.473659								4301.86					0.880774						20562.3	8270.19				1.49124	0.599779
	12603.4	6718.85				0.964392	0.514118							4470.29					0.741405								3014.34					0.617164						8019.85	7950.8				0.581624	0.576616
	12311.5	9319.73				0.942061	0.713133							1884.04					0.312472						Experiment 2	8773.78	9290		7716.41		1.13703	1.20393						17815.3	5631.13				1.29202	0.408387
	13711.2	11146.7				1.04917	0.852933							2385.83					0.395693							7367.26	11579.4				0.954752	1.50063						7604.95	4717.74				0.551535	0.342145
	13037	7344.82				0.997577	0.562016							3025.23					0.501739							6326.02	6614.49				0.819814	0.857198						6755.88	6261.43				0.489957	0.454098
	14912.3	8779.6				1.14107	0.671803							3422.31					0.567596							9937.41	5268.13				1.28783	0.682718						9101.24	4361.32				0.660049	0.316297
	15241.6	7672.26				1.16627	0.587071							1944.79					0.322547							5697.06	8825.3				0.738305	1.14371						8543.63	6651.03				0.61961	0.482353
	11580.8	7279.06				0.886148	0.556984					Experiment 2	6933.72	9257.53		7926.32		0.874772	1.16795							8786.7	3757.91				1.1387	0.487002						18529.2	5978.59				1.3438	0.433585
	15492.3	9017.42				1.18545	0.690001						8111.14	9610.05				1.02332	1.21242							7992.36	5810.85				1.03576	0.753051						30075.5	9250.14				2.18117	0.670848
	14845.4	7765.41				1.13595	0.594199						10874.4	8546.18				1.37194	1.0782							8536.17	8223.47				1.10624	1.06571						16446.7	8393.03				1.19277	0.608688
	19591.2	11177.5				1.49909	0.855291						9537.61	10179.9				1.20328	1.28431							8192.37	5618.59				1.06168	0.728135						21816.8	5505.62				1.58222	0.399284
	11615.7	7077.47				0.888817	0.541558						5910.45	5885.94				0.745674	0.742581							9588.43	5365.62				1.2426	0.695352						16588.4	9416.7				1.20304	0.682928
	11569.6	7750.2				0.885288	0.593035						5956.47	6778.35				0.75148	0.855171							4887.33	5734.44				0.633369	0.743149						14794	13447.7				1.07291	0.975266
	17463.1	6804.13				1.33625	0.520643						7683.84	6679.47				0.969409	0.842696							10420.5	4586.94				1.35044	0.594439						14720	12195				1.06754	0.884416
	9284.5	8928.34				0.710437	0.683185						5202.97	5454.81				0.656417	0.68819							5700.54	6278.39				0.738756	0.813642						7091.1	3664.6				0.514269	0.265768
	13602.5	9150.35				1.04085	0.700172						6427.96	3751.64				0.810964	0.473315							5724.45	4144.71				0.741854	0.537129						10252.2	4682.52				0.743519	0.33959
	12479.8	8611.54				0.95494	0.658943						8868.96	4102.86				1.11893	0.517625							8191.52	5547.23				1.06157	0.718887						8398.83	3933.98				0.609109	0.285305
	14024	10219.2				1.0731	0.781963						10648.3	6892.55				1.34341	0.869578							5963.4	5144.92				0.77282	0.66675						8971.36	5053.82				0.650631	0.366518
	6425.65	9934.96				0.491683	0.76021						9981.66	5241.71				1.25931	0.661305							3700.55	5534.81				0.479569	0.717277						17123.5	4750.35				1.24185	0.34451
	12461.6	10337.1				0.953544	0.790982						11120.1	4689.34				1.40294	0.591616							5211.81	4758.87				0.675419	0.616721						15491.8	5197.31				1.12351	0.376925
	11600.4					0.887646							10312.2	6298.23				1.301	0.794597							7665.35	5936.69				0.993383	0.769359						11031.7	8633.92				0.800052	0.626159
	9160.81					0.700973							12633.6	5284.45				1.59388	0.666697							5724.04	7358.81				0.7418	0.953657						9251.41	5276.51				0.67094	0.382668
	12905.1					0.987478							9914.39	3857.18				1.25082	0.48663							7656.33	6501.95				0.992214	0.842614						11874.2	5545.55				0.861152	0.40218
	7683.79					0.587953							10180.9	6135.15				1.28444	0.774023							8617.79	8857.22				1.11681	1.14784						7181.65	5317.55				0.520835	0.385645
	12354.4					0.945345							10193.2	5730.18				1.286	0.722931							8018.41	5625.74				1.03914	0.729062						7406.64	4880.55				0.537152	0.353952
	8950.98					0.684917							11019.7	7436.99				1.39027	0.938265							7616.08	9664.7				0.986997	1.25249						8860.47	4320.96				0.642588	0.313369
	7575.12					0.579638							4835.26	5772.72				0.610025	0.728298							10943					1.41815							8032.63	6010.85				0.582551	0.435925
	9101.36					0.696424							3626.91	5762.27				0.457578	0.72698							7863.97					1.01912							7622.54	5956.99				0.55281	0.432019
	7384.16					0.565026							5706.01	3395.53				0.719881	0.428387							10281.7					1.33244							17444.5	4587.9				1.26513	0.332729
	6828.84					0.522534							6155.93	2620.51				0.776644	0.330609							7625.66					0.98824							8692.62	6035.7				0.630415	0.437727
	10236.2					0.783261							4426.23	3687.95				0.558423	0.465279							10507.5					1.36171							8596.52	3112.04				0.623446	0.225695
Experiment 3	15956.9	7836.75		10603.6		1.50486	0.739068						4547.02	2653.02				0.573661	0.33471							9643.63					1.24976							10191.5	4384.03				0.739117	0.317943
	11078.6	10933.7				1.0448	1.03114						3789.33	3499.7				0.478069	0.441529							4894.62					0.634313							8099.35	4191.34				0.587389	0.303969
	9146.03	10399.1				0.862544	0.980714						5397.2	5564.65				0.680922	0.702048							9655.23					1.25126							25399.4	6039.96				1.84204	0.438037
	11009.2	8038.19				1.03826	0.758065						5955.86	4258.02				0.751403	0.5372							8107.06					1.05063							12478.1	5659.11				0.904947	0.410416
	10850	4717.67				1.02324	0.444914						5126.51	4079.69				0.646771	0.514702							9468.45					1.22705							13145.1	5554.71				0.95332	0.402845
	5811.74	10348.1				0.548094	0.975913						10152	4912.95				1.28079	0.619828							6094.02					0.789748							12034.6	3847.94				0.872785	0.279064
	7889.59	6838.84				0.744051	0.644957						7375.32	3736.86				0.930486	0.47145							4975.29					0.644767							16063.9	6592.55				1.165	0.478112
	7317.13	6716.02				0.690064	0.633374						4599.15	3103.17				0.580238	0.391502							6136.45					0.795247							11695.8	4720.81				0.848215	0.342368
	11099.4	24121.2				1.04676	2.27483						10076.1	3801.58				1.27122	0.479614							10731.3					1.39071							14284.7	4025.64				1.03597	0.291951
	20717	11211.8				1.95378	1.05736						9915.84	4591.01				1.251	0.579211						Experiment 3	6731.03	5250.21		6866.57		0.980261	0.764605						17437.2	8090.9				1.2646	0.586777
	10101.8	9925.14				0.952679	0.93602						10908.6	2519.59				1.37626	0.317876							6490.92	5069.42				0.945293	0.738276						15780.9	4576.01				1.14448	0.331866
	11482.2	7674.26				1.08287	0.723744						10299.4	2739.42				1.2994	0.345611							11109.6	4493.93				1.61793	0.654465						24787.7	3114.49				1.79768	0.225872
	10042	6071.29				0.947046	0.572572						9074.06	2525.09				1.1448	0.31857							6014.45	4612.41				0.875904	0.67172						5951.06	4268.67				0.431589	0.309577
	8238.49	13779.8				0.776955	1.29954						7792.17	2714.03				0.983076	0.342408							3438.2	4102.97				0.500716	0.597529							4542.02					0.329401
	11582.6	11710.6				1.09233	1.1044						7068.41	4695.26				0.891765	0.592364							5123.59	4863.54				0.746164	0.708292							5130.46					0.372077
	11266.6	7728.44				1.06253	0.728854						8713.72	3135.61				1.09934	0.395595							5215.84	6120.06				0.7596	0.891284							3424.95					0.248388
	9248.71	8696.75				0.872228	0.820173							1908					0.240717							4577.46	6660.64				0.66663	0.97001							4234.45					0.307095
	8153.03	16998.2				0.768896	1.60307							2962.46					0.37375							5727.78	6349.78				0.834156	0.924739							4271.81					0.309805
	8698.12	16643.4				0.820303	1.5696							4138.51					0.522123							5962.07	3824.05				0.868275	0.556909							7307.81					0.529985
	8670.95	15486.5				0.81774	1.46051					Experiment 3	9575.01	5253.62		5166.81		1.85318	1.0168							5655.54	5034.93				0.823634	0.733253					Experiment 3	9086.2	2728.19		6964.67		1.30461	0.391719
	9685.39	13283.3				0.91341	1.25272						16181.2	5153.85				3.13175	0.997491							11492.5	4729.77				1.67369	0.688812						10432.3	6418.05				1.4979	0.921516
	11051	14129.2				1.0422	1.3325						4325.98	3489.93				0.837262	0.675452							10921	5990.42				1.59046	0.872404						9494.44	4476.45				1.36323	0.642738
	8399.64	18121.5				0.792153	1.709						5440.55	3742.09				1.05298	0.724256							9198.51	3599.76				1.33961	0.524244						6552.96	5470.45				0.940886	0.785458
	7828.19	18441.5				0.738262	1.73918						5684.87	2837.43				1.10027	0.549164							10907.4	3295.28				1.58848	0.479902						13007.9	4636.24				1.8677	0.665681
	15345.9	11498.1				1.44724	1.08437						5422.7	4763.24				1.04953	0.921892							9602.48	4392.42				1.39844	0.639682						7357.74	4361.9				1.05644	0.626289
	15893.5	9401.17				1.49889	0.886605						8375.53	3253.16				1.62103	0.629627							11646.3	4371.52				1.69609	0.636638						7352.19	4101.45				1.05564	0.588894
	10164.9	5961.51				0.958631	0.562218						3633.92	3651.39				0.70332	0.7067							10834.9	4356.25				1.57792	0.634415						8227.31	6442.94				1.18129	0.925089
	13026.2	11516.4				1.22847	1.08609						6930.1	2182.55				1.34127	0.422416							10257.2	6327.78				1.49378	0.921535						5095.72	4652.7				0.731653	0.668044
	7748.18	5726.05				0.730716	0.540013						9279.93	3737.84				1.79607	0.723433							3423.4	4281.44				0.498561	0.623519						6861.58	3839.12				0.985199	0.551228
		4996.39					0.4712						4375.43	3030.55				0.846833	0.586542							4342.01	4187.62				0.63234	0.609857						10829.4	7477.64				1.55491	1.07365
		4050.09					0.381956						8761.39	2846.89				1.6957	0.550995							12337.9	4735.5				1.79681	0.689646						8506.9	6751.38				1.22144	0.969376
		7544.1					0.711469						6490.65	1991.01				1.25622	0.385346							9057.96	4758.23				1.31914	0.692956						4084.58	8047.42				0.586472	1.15546
		6164.78					0.581389						3699.36	3373.56				0.715984	0.652928							8542.18	4399.81				1.24403	0.640759						3358.54	8232.18				0.482226	1.18199
		8356					0.788038						4703.65	2792.82				0.910359	0.54053							5787.41	3964.69				0.842839	0.57739						3908.19	5742.74				0.561145	0.824554
		10800.5					1.01857						7926.22	2525.14				1.53406	0.488724							7037.53	3020.95				1.0249	0.43995						4456.56	5908.52				0.639882	0.848356
		6152.23					0.580205						2499.2	4649.24				0.483703	0.899828							3804.45	6361.08				0.554054	0.926384						5595.15	3801.18				0.803362	0.545781
Experiment 4	4486.03	2222.37		3926.9		1.14238	0.565936						3813.84	3190.25				0.738142	0.617451							3070.57	2431.94				0.447177	0.354171						5510.87	6022.77				0.791261	0.864761
	4629.89	1971.66				1.17902	0.502091						3626.2	8035.56				0.701825	1.55523							5422.14	2682.83				0.789644	0.390709						5450.47	7789.17				0.782589	1.11838
	4704.31	2890.53				1.19797	0.736085						6065.38	2401.75				1.17391	0.464842							4423.34	2987.58				0.644185	0.435091						3153.64	5348.45				0.452806	0.767941
	5178.89	2748.72				1.31882	0.699973						2584.61	2533.78				0.500232	0.490396							8255.16	4543.49				1.20223	0.661682						6480.42	4730.98				0.930472	0.679284
	3888.44	2447.16				0.990207	0.62318						4039.35	3222.8				0.781787	0.62375							4059.61	5184.34				0.591214	0.755011						3320.75	5831.34				0.4768	0.837276
	4123.7	2414.26				1.05012	0.614802						5345.57	2638.86				1.0346	0.510733							8636.28	3564				1.25773	0.519037						3908.05	6923.65				0.561125	0.994111
	4074.32	2752.81				1.03754	0.701014						6356.12	3699.43				1.23018	0.715998							4964.85	2721.28				0.723046	0.396309						6892.04	7034.23				0.989572	1.00999
	5083.74	1766.79				1.29459	0.44992						3653.57	2407.03				0.707122	0.465864							5828.42	4011.64				0.848811	0.584228						6056.65	6341.25				0.869626	0.910489
	5343.52	2851.58				1.36075	0.726167						2760.15	2741.24				0.534207	0.530548							4723.86	5425.12				0.687951	0.790078						7189.81	5225.29				1.03233	0.750257
	4175.82	3099.67				1.06339	0.789344						4623.91	3174.26				0.894925	0.614355							7474.14	4884.06				1.08848	0.711282						9247.66	4701.92				1.3278	0.675111
	4406.51	3129.32				1.12213	0.796895						3566.84	1947.45				0.690337	0.376916							3113.36	5934.67				0.453409	0.864285						8778.61	4823.62				1.26045	0.692584
	2793.99	2622.33				0.711501	0.667786						1378.37	1852.19				0.266773	0.358479							4029.19	3864.88				0.586783	0.562855						5076.83	5501.98				0.728941	0.789984
	4179.82	2331.89				1.06441	0.593826						1846.91	3409.92				0.357457	0.659966							3764.64	4914.66				0.548256	0.715738						5593.61	5712.31				0.803141	0.820184
	3643.64	2214.11				0.927867	0.563831						2441.49	3579.51				0.472533	0.69279							11704.6	4666.99				1.70458	0.679668						5576.52	14980.7				0.800688	2.15095
	3729.54	2120.78				0.949743	0.540064						2117.1	10029.9				0.40975	1.94121							5755.12	6680.29				0.838136	0.972872						8314.43	7432.18				1.1938	1.06713
	3822.02	2306.94				0.973291	0.587471						1966.73	5150.56				0.380647	0.996855							7170.3	5998.24				1.04423	0.873543						5914.09	5411.06				0.849156	0.77693
	4287.56	2437.06				1.09184	0.620607						3010.79	4214.37				0.582717	0.815661							6173.21	6752.13				0.899024	0.983334						5812.53	7216.43				0.834574	1.03615
	4074.57	3283.6				1.0376	0.836182						3212	4465.79				0.621659	0.864323							6556.17					0.954796							10463.4	4539.45				1.50236	0.651783
	4326.39	3946.84				1.10173	1.00508						10044.2	4623				1.94399	0.894749							6281.7					0.914823							15061	6250.92				2.16249	0.897519
	5043.07	3137.09				1.28424	0.798872						4691.05	2881.38				0.90792	0.557671							8014.21					1.16714							9480.41	5476.79				1.36122	0.786367
	3505.59	2899				0.892712	0.738241						8683.07	4687.14				1.68055	0.907163							6404.39					0.932692							8033.49	8107.86				1.15346	1.16414
	3896.26	2987.04				0.992199	0.760662						5218.81	2493.03				1.01006	0.482508							5850.87					0.852081							18666.5	7550.67				2.68018	1.08414
	4388.14	3006.86				1.11746	0.765709						2433.62	2862.56				0.471009	0.554029							8458.53					1.23184							10613.6					1.52392
	4905.81	3373.32				1.24928	0.85903						5316.24	1954.91				1.02892	0.37836							4820.69					0.702053							4061.64					0.583178
	3940.93	3744.32				1.00357	0.953507						8679.11	3521.48				1.67978	0.681557						Experiment 4	3765.37	5689.55		3634.59		1.03598	1.56539						4731.38					0.67934
	3820.91	2157.32				0.97301	0.54937						8368.29	2304.89				1.61962	0.446094							2964.69	3768.41				0.815689	1.03682						5357.05					0.769176
	3647.32	2372.03				0.928803	0.604046						2540.32	2318.22				0.49166	0.448675							3414.13	4361.73				0.939344	1.20006						4394.46					0.630965
	4624.6	3166.26				1.17767	0.8063						1944.08	2618.03				0.376263	0.5067							3913.99	4708.38				1.07687	1.29544						3245.42					0.465983
	3594.81	4122.18				0.915433	1.04973						4039.99	2333.77				0.781911	0.451685							5123.46	4939.21				1.40964	1.35895						4090.76					0.587359
	3187.9	980.073				0.81181	0.249579																			2244.55	6262.26				0.617551	1.72296						5823.4					0.836135
	2026.63	2335.57				0.516088	0.594763																			2998.33	6217.97				0.824943	1.71078						6204.4					0.890839
	2908.94	3923.09				0.740773	0.999031																			5489.77	3050.54				1.51042	0.839309						4556.89					0.654286
	3038.08	3234.97				0.773659	0.823797																			4114.93	6500.24				1.13216	1.78844
	2420.01	4020.32				0.616265	1.02379																			4844.18	4938.04				1.3328	1.35862
	3605.45	3242.02				0.918143	0.825594																			4855.57	4059.45				1.33594	1.11689
	4297.63	2615.21				1.09441	0.665972																			4713.47	4298.28				1.29684	1.18261
	3406.08	3348.61				0.867372	0.852738																			3658.51	3646.98				1.00658	1.00341
	4330.71	2706.38				1.10283	0.689189																			3804.65	3688.29				1.04679	1.01477
	3130.57	3973.38				0.797213	1.01184																			3777.07	4548.48				1.0392	1.25144
	3190.66	3088.46				0.812515	0.786489																			2769.25	3449.2				0.761916	0.948992
	4096.58	3116.2				1.04321	0.793553																			2873.97	4955.58				0.790728	1.36345
	3814.72	2796.05				0.971432	0.712024																			2523.09	4297.95				0.694189	1.18251
	2632					0.67025																				4577.83	3992.61				1.25952	1.0985
	4377.41					1.11472																				2795.99	4219.9				0.769274	1.16104
																										4520.23	4550.31				1.24367	1.25195
																										3670.85	3812.02				1.00998	1.04882
																										2969.77	7279.85				0.817086	2.00294
																										3309.83	5280.81				0.910647	1.45293
																										3731.79	6129.03				1.02674	1.68631
																										4259.43	7795.15				1.17191	2.14471
																										4338.12	5472.09				1.19357	1.50556
																										4914.46					1.35214
																										2847.23					0.78337
																										4317.72					1.18795
																										4848.93					1.33411
																										2439.58					0.671212
																										2561.99					0.704891
																										2640.89					0.726601
																										2181.28					0.600145
																										3384.52					0.931199
																										2555.97					0.703236
																										3987.18					1.09701
																										3046.36					0.838158
