# Supplementary material for: Lipid kinases VPS34 and PIKfyve coordinate a phosphoinositide cascade to regulate retriever-mediated recycling on endosomes
Source: eLife journal article supplement (doi:10.7554/elife.69709), 2022-01-18
Supplement: fig7-figsupp5-data1 [file Figure 7-figure supplement 5.xlsx]

## Sheet: Sheet1
Figure 7-figure supplement 5
Apilimod induced elevation of total pools of PI3P could be prevented by co-treatment with VPS34-IN1
Experiment 1						Experiment 2						Experiment 3
	DMSO	1 uM apilimod	1 uM apilimod + 0.01 uM VPS34-IN1	1 uM apilimod + 0.1 uM VPS34-IN1			DMSO	1 uM apilimod	1 uM apilimod + 0.01 uM VPS34-IN1	1 uM apilimod + 0.1 uM VPS34-IN1			DMSO	1 uM apilimod	1 uM apilimod + 0.01 uM VPS34-IN1	1 uM apilimod + 0.1 uM VPS34-IN1
PI	92.803	92.048	92.632	93.151		PI	93.206	92.453	92.244	92.794		PI	92.336	91.547	91.625	91.975
PI3P	0.152	0.407	0.301	0.178		PI3P	0.142	0.372	0.305	0.177		PI3P	0.225	0.407	0.3	0.251
PI4P	3.343	4.208	3.867	3.467		PI4P	3.294	3.917	4.235	3.725		PI4P	3.815	4.606	4.782	4.3
PI5P	0.287	0.1	0.089	0.075		PI5P	0.259	0.074	0.064	0.111		PI5P	0.256	0.098	0.074	0.132
PI35P2	0.035	0.02	0.019	0.02		PI35P2	0.041	0.008	0.017	0.016		PI35P2	0.059	0.027	0.019	0.032
PI45P2	3.345	3.182	3.059	3.071		PI45P2	3.033	3.148	3.107	3.148		PI45P2	3.268	3.271	3.163	3.272
PI345P3	0.035	0.035	0.032	0.037		PI345P3	0.025	0.027	0.028	0.028		PI345P3	0.04	0.043	0.036	0.038
