# Supplementary material for: Lipid kinases VPS34 and PIKfyve coordinate a phosphoinositide cascade to regulate retriever-mediated recycling on endosomes
Source: eLife journal article supplement (doi:10.7554/elife.69709), 2022-01-18
Supplement: fig7-figsupp6-data1 [file Figure 7-figure supplement 6.xlsx]

## Sheet: Sheet1
		band intensity						band intensity related to TfR1					% remaining after permeabilization
		TfR1	VPS35L	FAM21	SNX17	COMMD1		VPS35L	FAM21	SNX17	COMMD1		VPS35L	FAM21	SNX17	COMMD1
unpermeabilized	DMSO	22.1355	100.679	136.044	62.6823	81.8456		4.54828	6.14595	2.83175	3.69748
	Apilimod	24.8311	114.944	133.272	87.3919	90.4665		4.62902	5.36715	3.51945	3.64327
	VPS34-IN1	30.1551	121.021	130.773	102.404	67.9422		4.01329	4.33667	3.39591	2.25309
	Apilimod + VPs34-IN1	32.7025	117.488	152.575	124.456	77.4995		3.59265	4.66555	3.80572	2.36983
Permeabilized	DMSO	30.9774	66.5286	35.0968	16.4433	5.49163		2.14765	1.13298	0.530815	0.177278		47.2189	18.4346	18.7451	4.79457
	Apilimod	31.1307	30.2442	33.7408	27.917	3.72789		0.971525	1.08384	0.896767	0.11975		20.9877	20.194	25.4803	3.28687
	VPS34-IN1	38.4584	23.7163	28.0433	9.89818	6.06123		0.616675	0.729187	0.257374	0.157605		15.3658	16.8144	7.57895	6.99505
	Apilimod + VPs34-IN1	39.5301	33.2179	27.9648	15.5201	1.10806		0.840319	0.70743	0.392613	0.0280307		23.39	15.1628	10.3164	1.18281
