# Supplementary material for: Lipid kinases VPS34 and PIKfyve coordinate a phosphoinositide cascade to regulate retriever-mediated recycling on endosomes
Source: eLife journal article supplement (doi:10.7554/elife.69709), 2022-01-18
Supplement: fig7-figsupp8-data1 [file Figure 7-figure supplement 8B.xlsx]

## Sheet: Sheet1
Figure 7-figure supplement 7B
Acute inhibition of PIKfyve does not alter cortactin co-localization on Vps35 endosomes
	Cortactin intensity on Vps35					Normalized Cortactin intensity on Vps35 (normalized to the average of DMSO)
	DMSO	Apilimod		Average of DMSO		DMSO	Apilimod
Experiment 1	10278.8	9428.04		8937.53		1.15008	1.05488
	8903.65	10750.1				0.996209	1.2028
	8545.27	6161.26				0.95611	0.689369
	9132.01	8739.61				1.02176	0.977855
	15456.1	10287.1				1.72934	1.15101
	19647.4	7017.67				2.19831	0.785191
	8715.32	7343.71				0.975137	0.82167
	8288.44	7662.96				0.927375	0.857391
	10361.1	7130.97				1.15927	0.797868
	9452.71	5409.26				1.05764	0.60523
	8349.27	5033.53				0.934181	0.56319
	9131.9	7077.47				1.02175	0.791881
	11974.9	8704.76				1.33984	0.973956
	6743.44	7116.74				0.754508	0.796276
	5942.93	6280.16				0.664941	0.702673
	5556.7	6927.21				0.621726	0.77507
	10217.8	9750.39				1.14324	1.09095
	10278.5	6713.42				1.15004	0.751149
	9144.39	9324.61				1.02315	1.04331
	7383.12	11057				0.826081	1.23715
	8413.38	11426.2				0.941353	1.27845
	12839	13498.2				1.43653	1.51029
	9062.09	10844.9				1.01394	1.21341
	8293.36	12486.4				0.927925	1.39708
	13142.8	14364				1.47052	1.60715
	11418.2	8826.82				1.27756	0.987613
	6049.74	8854.58				0.676892	0.990719
	6043.41	10739.6				0.676183	1.20163
	4767.81	8023				0.53346	0.897675
	5619.82	9033.93				0.628788	1.01079
	6687.27	9225.73				0.748224	1.03225
	7225.44	14423.7				0.808437	1.61384
	6994.83	11556				0.782635	1.29298
	5695.6	7622.83				0.637268	0.852901
	6844.83	12955.1				0.765853	1.44952
	6589.23	7150.82				0.737254	0.800089
	8758.12	7848.74				0.979926	0.878177
	10926.8	9021.92				1.22258	1.00944
	9349.51	8885.96				1.0461	0.99423
	8620.69	11070.5				0.964549	1.23865
	9593.16	9444.56				1.07336	1.05673
		8062.85					0.902134
		7733.07					0.865236
		9731.42					1.08883
		8640.86					0.966806
		9849.63					1.10205
		11912.9					1.33291
		8813.52					0.986124
		11500.9					1.28681
Experiment 2	9629.8	5968.44		13192.7		0.729936	0.452406
	10750.1	10529.2				0.814851	0.798111
	11850.1	6821.18				0.898237	0.517043
	13610.1	7860.8				1.03164	0.595846
	12345.3	6867.97				0.935771	0.52059
	8729.86	7064.09				0.661721	0.535456
	9394.29	8207.29				0.712085	0.62211
	9145.1	16714.4				0.693196	1.26695
	9309.64	7715.72				0.705668	0.58485
	13121.8	8966.27				0.99463	0.679641
	13771.5	12220.9				1.04387	0.92634
	13284.8	10942.4				1.00699	0.829428
	7573	3560.81				0.574031	0.269909
	14957.8	6030.41				1.1338	0.457103
	10869.6	6080.88				0.823913	0.460929
	10777.4	6241.47				0.816923	0.473102
	13881.2	3410.65				1.05219	0.258526
	18497.1	3968.03				1.40207	0.300775
	8663.23	3664.65				0.656671	0.27778
	12157.2	4483.4				0.921516	0.33984
	13357.6	6531.21				1.0125	0.495064
	8997.01	3530.53				0.681971	0.267614
	21484.3	5535.44				1.6285	0.419585
	14243.3	4530.39				1.07964	0.343402
	19374.2	3110.97				1.46856	0.235811
	17335.6	5210.38				1.31403	0.394945
	19055.5	5863.24				1.4444	0.444432
	25275.9	6228.17				1.91591	0.472093
	10687.4	6048.93				0.810101	0.458508
	13878.6	6023.12				1.05199	0.456551
	10029.8	4356.71				0.760255	0.330238
	15933.2	6160.16				1.20774	0.466939
	14388.9	6212.46				1.09067	0.470903
	11889.2	5681.55				0.901194	0.43066
	17699.9	4510.12				1.34164	0.341866
	10907.2	7228.65				0.826763	0.547929
	9681.01	5048.89				0.733818	0.382704
	14702.9	5121.91				1.11447	0.388239
	13273.5	6321.17				1.00612	0.479143
		6604.77					0.500639
		7184.05					0.544549
Experiment 3	5856.32	10879		8651.13		0.676943	1.25753
	10259.2	10508.2				1.18588	1.21466
	8097.29	10491.4				0.935981	1.21271
	8647.49	11489.5				0.999578	1.32809
	7772.74	10019				0.898464	1.15812
	8822.09	12117.7				1.01976	1.40071
	8183.36	10913.9				0.945929	1.26156
	10302.7	7934.43				1.19091	0.917155
	14156.9	8319.98				1.63642	0.961721
	6399.88	11278.3				0.739773	1.30368
	14714.1	8801.11				1.70082	1.01734
	11981.8	10236.9				1.38499	1.18331
	12181.6	9599.81				1.4081	1.10966
	8954.39	14305.5				1.03505	1.6536
	5644.5	8349.87				0.652458	0.965176
	6898.07	7471.1				0.797361	0.863598
	8870.45	11367.7				1.02535	1.31402
	6145.57	9219.72				0.710377	1.06572
	8534.62	9306.59				0.986532	1.07577
	6760.1	13087.4				0.781411	1.51279
	6765.35	9909.9				0.782018	1.1455
	8493.05	13426.6				0.981727	1.552
	8303.65	11740.4				0.959834	1.3571
	7720.59	9443.56				0.892437	1.0916
	5498.57	15527.5				0.635589	1.79485
	7046.48	15309.2				0.814515	1.76962
	7014.25	13666.6				0.810789	1.57974
	4233.98	13291.6				0.489413	1.5364
	6560.2	14878.2				0.758305	1.7198
	5722.5	13007				0.661474	1.5035
	13617.5	18393.7				1.57407	2.12616
	6744.29	14462.9				0.779585	1.67179
	11340.4	15296.1				1.31085	1.76811
	8792.9	17275.8				1.01639	1.99694
	8430.19	11228.7				0.974461	1.29794
	6283.74	15421.3				0.726348	1.78258
	8825.75					1.02018
	5613.22					0.648842
	11090.4					1.28196
	9800.33					1.13284
	8860.31					1.02418
	13046.6					1.50808
	13080.3					1.51198
	8481.83					0.98043
	8751.56					1.01161
