# Supplementary material for: Lipid kinases VPS34 and PIKfyve coordinate a phosphoinositide cascade to regulate retriever-mediated recycling on endosomes
Source: eLife journal article supplement (doi:10.7554/elife.69709), 2022-01-18
Supplement: fig9-data1 [file Figure 9.xlsx]

## Sheet: Sheet1
Effect of COMMD1 mutants on integrin trafficking
		Internalized pool										Non-recycled pool
		Mock	WT	QAA	EQE	Average	N_Mock	N-WT	N-QAA	N-EQE		Mock	WT	QAA	EQE	Average	N_Mock	N-WT	N-QAA	N-EQE
	EXP1	0.168263	0.149132	0.124846	0.106931	0.157978	1.0651	0.944007	0.790273	0.676874	EXP1	0.0344477	0.0224731	0.0272702	0.0405952	0.039831	0.864847	0.564212	0.684647	1.01919
		0.123144	0.09986	0.141811	0.123965	0.157978	0.7795	0.632113	0.897663	0.784697		0.0423936	0.0361604	0.0354579	0.051789	0.039831	1.06434	0.907845	0.890209	1.30022
		0.141987	0.130822	0.0982133	0.110916	0.157978	0.898774	0.8281	0.62169	0.702097		0.052105	0.0431285	0.0287635	0.0538345	0.039831	1.30815	1.08279	0.722139	1.35157
		0.148981	0.136333	0.125848	0.105214	0.157978	0.943047	0.862987	0.796617	0.666004		0.0340528	0.038644	0.0283992	0.0606253	0.039831	0.854932	0.970199	0.712993	1.52206
		0.200278	0.168107	0.128057	0.117524	0.157978	1.26776	1.06412	0.8106	0.743926		0.0337259	0.0354056	0.0243415	0.0750037	0.039831	0.846725	0.888896	0.61112	1.88305
		0.144002	0.126092	0.124522	0.145526	0.157978	0.911534	0.798161	0.788224	0.921178		0.0309672	0.0364063	0.0327946	0.0754207	0.039831	0.777465	0.914018	0.823343	1.89352
		0.15988	0.140199	0.142397	0.11211	0.157978	1.01204	0.887461	0.901371	0.709655		0.0398065	0.0405364	0.0421135	0.0716997	0.039831	0.999384	1.01771	1.0573	1.8001
		0.134779	0.130423	0.125956	0.129268	0.157978	0.853153	0.825574	0.797303	0.818264		0.04119	0.0420728	0.0480805	0.0766197	0.039831	1.03412	1.05628	1.20711	1.92362
		0.132621	0.163585	0.128963	0.167453	0.157978	0.839492	1.03549	0.816333	1.05998		0.0443013	0.0360925	0.057784	0.0733397	0.039831	1.11223	0.90614	1.45073	1.84127
		0.2276	0.165751	0.134267	0.137234	0.157978	1.4407	1.04921	0.849908	0.868689		0.041263	0.0309872	0.0440177	0.0510191	0.039831	1.03595	0.777968	1.10511	1.28089
		0.110216	0.145368	0.128762	0.156378	0.157978	0.697666	0.92018	0.815063	0.989875		0.0365077	0.0236856	0.037877	0.0458057	0.039831	0.916566	0.594652	0.950943	1.15
		0.206149	0.129683	0.110993	0.183147	0.157978	1.30492	0.820893	0.702585	1.15932		0.0302214	0.0289814	0.0262187	0.040603	0.039831	0.75874	0.72761	0.658249	1.01938
		0.188055	0.113404	0.126467	0.165329	0.157978	1.19038	0.717846	0.800535	1.04653		0.0361638	0.027903	0.022523	0.0459096	0.039831	0.907932	0.700536	0.565464	1.15261
		0.125734	0.101536	0.10576		0.157978	0.795897	0.642723	0.669462			0.0361104	0.0258602	0.0439591	0.0351973	0.039831	0.906591	0.649248	1.10364	0.883666
			0.117118	0.198973		0.157978		0.741358	1.2595			0.0494962	0.0222143	0.050626	0.0354821	0.039831	1.24265	0.557715	1.27102	0.890817
			0.122163	0.118906		0.157978		0.773288	0.752675			0.0448863	0.0317255	0.0379355		0.039831	1.12692	0.796503	0.952411
			0.131127	0.106142		0.157978		0.83003	0.671881			0.0391864	0.0171421	0.0480038		0.039831	0.983816	0.430371	1.20519
				0.15595		0.157978			0.987165			0.0501987	0.0400939	0.0417808		0.039831	1.26029	1.0066	1.04895
				0.127802		0.157978			0.808987			0.0436061		0.0358563		0.039831	1.09478		0.90021
				0.121998		0.157978			0.772247			0.0359929				0.039831	0.903641
	EXP2	0.0909761	0.0946653	0.0657955	0.0800065	0.086983	1.04591	1.08832	0.756418	0.919795	EXP2	0.0285678	0.0154027	0.0362103	0.0276902	0.029519	0.967778	0.521791	1.22668	0.938047
		0.0709406	0.123343	0.0850413	0.0718418	0.086983	0.815568	1.41802	0.977678	0.825929		0.0249898	0.0236888	0.0215606	0.0375289	0.029519	0.846565	0.802494	0.730396	1.27135
		0.0719247	0.0620138	0.0632076	0.067473	0.086983	0.826882	0.712941	0.726666	0.775703		0.0183945	0.0278295	0.0172605	0.0287861	0.029519	0.623141	0.942765	0.584725	0.975171
		0.0963999	0.057524	0.103675	0.0499423	0.086983	1.10826	0.661324	1.1919	0.574162		0.0195919	0.0237886	0.0193466	0.0246497	0.029519	0.663704	0.805874	0.655394	0.835046
		0.0755438	0.0725216	0.0928764	0.0462175	0.086983	0.868489	0.833744	1.06775	0.53134		0.0309894	0.0206333	0.0189753	0.0349554	0.029519	1.04981	0.698983	0.642816	1.18416
		0.0624734	0.0645156	0.0943308	0.064861	0.086983	0.718225	0.741703	1.08447	0.745674		0.0290909	0.0135452	0.014647	0.0313146	0.029519	0.985498	0.458863	0.496189	1.06083
		0.102822	0.0628295	0.0679413	0.0712012	0.086983	1.1821	0.722319	0.781087	0.818564		0.0367012	0.0243843	0.0200697	0.029533	0.029519	1.24331	0.826056	0.679891	1.00048
		0.0866673	0.0665024	0.114453	0.0697508	0.086983	0.99637	0.764545	1.31581	0.80189		0.031013	0.0303405	0.0236624	0.0330208	0.029519	1.05061	1.02783	0.801599	1.11863
		0.0965936	0.0347903	0.0670242	0.0645193	0.086983	1.11049	0.399967	0.770544	0.741746		0.0397238	0.0506892	0.0221246	0.0248474	0.029519	1.3457	1.71717	0.749502	0.841742
		0.0577779	0.0659556	0.120275	0.0987484	0.086983	0.664243	0.758259	1.38274	1.13526		0.0473175	0.0403215	0.0187318	0.031981	0.029519	1.60295	1.36595	0.634569	1.08341
		0.0880615	0.073537	0.0928938	0.0836915	0.086983	1.0124	0.845418	1.06795	0.962159		0.028846	0.0258749	0.0273842	0.0355663	0.029519	0.977199	0.876549	0.927681	1.20486
		0.0709634	0.0766327	0.111334	0.0921829	0.086983	0.81583	0.881008	1.27995	1.05978		0.0411016	0.0392123	0.0215791	0.0342205	0.029519	1.39238	1.32838	0.731023	1.15927
		0.0678158	0.0783625	0.0797507	0.06972	0.086983	0.779644	0.900894	0.916854	0.801536		0.0250276	0.0246527	0.0294297	0.031558	0.029519	0.847848	0.835146	0.996974	1.06907
		0.0810309	0.0832382	0.0860304	0.0833651	0.086983	0.931572	0.956948	0.989048	0.958407		0.0202966	0.035433	0.0232197	0.0388293	0.029519	0.687578	1.20035	0.786601	1.3154
		0.0796438	0.138028	0.083747	0.0783685	0.086983	0.915625	1.58684	0.962797	0.900963		0.0178931	0.0312591	0.0224396	0.0457238	0.029519	0.606156	1.05895	0.760175	1.54896
		0.14765	0.148056	0.0896201	0.0742763	0.086983	1.69745	1.70213	1.03032	0.853918		0.0222281	0.0328034	0.0208163	0.0386731	0.029519	0.753009	1.11126	0.705182	1.31011
		0.10286	0.171793	0.0705014	0.0952437	0.086983	1.18254	1.97502	0.810519	1.09497		0.0284875	0.0204722	0.0259976		0.029519	0.965058	0.693526	0.880707
		0.107535	0.147468	0.0739		0.086983	1.23627	1.69537	0.849591			0.0333598	0.0258877	0.0214734		0.029519	1.13011	0.876983	0.727445
		0.0949968				0.086983	1.09213					0.0372407	0.0264023	0.0270064		0.029519	1.26158	0.894417	0.914881
													0.0206712	0.0362975		0.029519		0.700267	1.22963
														0.0257408		0.029519			0.872009
														0.029969		0.029519			1.01524
														0.0250523		0.029519			0.848684
														0.0213354		0.029519			0.722767
														0.0207759		0.029519			0.703815
	EXP3	0.105235	0.143538	0.141876	0.13567	0.115964	0.90748	1.23778	1.22345	1.16994	EXP3	0.186169	0.11471	0.207823	0.287183	0.225012	0.827372	0.509795	0.923606	1.2763
		0.0939297	0.184647	0.119059	0.10271	0.115964	0.809991	1.59228	1.02669	0.885705		0.276589	0.270606	0.197383	0.304972	0.225012	1.22922	1.20263	0.877211	1.35536
		0.0922794	0.12445	0.0979389	0.106697	0.115964	0.795759	1.07318	0.844563	0.920083		0.275294	0.275922	0.176932	0.225696	0.225012	1.22347	1.22625	0.786321	1.00304
		0.116354	0.136384	0.096044	0.150396	0.115964	1.00337	1.17609	0.828222	1.29692		0.216643	0.227398	0.160835	0.236341	0.225012	0.962808	1.0106	0.714783	1.05035
		0.109586	0.150295	0.0901704	0.111738	0.115964	0.944998	1.29605	0.777572	0.963559		0.256084	0.188217	0.200325	0.347089	0.225012	1.13809	0.836474	0.890288	1.54253
		0.106243	0.151979	0.110772	0.117677	0.115964	0.916174	1.31057	0.955227	1.01477		0.172352	0.243344	0.200275	0.191393	0.225012	0.765969	1.08147	0.890063	0.850592
		0.136423	0.150328	0.111868	0.126077	0.115964	1.17642	1.29633	0.96468	1.0872		0.245753	0.229186	0.168615	0.168962	0.225012	1.09218	1.01855	0.749359	0.750904
		0.142083	0.128645	0.143401	0.15047	0.115964	1.22523	1.10935	1.2366	1.29755		0.281013	0.247487	0.211585	0.177424	0.225012	1.24888	1.09988	0.940329	0.788508
		0.148575	0.101129	0.141537	0.106251	0.115964	1.28122	0.872071	1.22052	0.916237		0.176442	0.218413	0.223427	0.19094	0.225012	0.784145	0.970674	0.992958	0.848578
		0.108196	0.108391	0.145647	0.123354	0.115964	0.933012	0.934691	1.25596	1.06373		0.248237	0.19238	0.225002	0.236588	0.225012	1.10322	0.854978	0.999955	1.05145
		0.126226	0.100569	0.163986	0.0944152	0.115964	1.08849	0.867242	1.41411	0.814177		0.186757	0.115709	0.229135	0.315426	0.225012	0.829986	0.514235	1.01832	1.40182
		0.123611	0.119524	0.111009	0.116821	0.115964	1.06594	1.0307	0.957274	1.00739		0.1706	0.21147	0.204026	0.29093	0.225012	0.758182	0.939817	0.906733	1.29295
		0.122293	0.134996	0.105575	0.132124	0.115964	1.05458	1.16412	0.910414	1.13936		0.23263	0.182488	0.18844	0.176843	0.225012	1.03386	0.811016	0.837466	0.785925
		0.0954028	0.165171	0.115628	0.103609	0.115964	0.822693	1.42433	0.997101	0.893459		0.172201	0.16458	0.214098	0.224632	0.225012	0.765297	0.731427	0.951496	0.998311
		0.0754707		0.115862	0.119231	0.115964	0.650812		0.999121	1.02818		0.245688	0.170898	0.158993	0.239955	0.225012	1.09189	0.759506	0.706596	1.06641
		0.128492		0.119372		0.115964	1.10803		1.02939			0.244852	0.202935	0.260009	0.217128	0.225012	1.08817	0.901885	1.15553	0.964963
		0.115104		0.168542		0.115964	0.992583		1.4534			0.203665	0.163887	0.189413	0.247328	0.225012	0.905128	0.728346	0.841789	1.09918
		0.105133				0.115964	0.906604					0.259246	0.191238	0.202571		0.225012	1.15214	0.849901	0.900267
		0.122962				0.115964	1.06034						0.11533	0.196389		0.225012		0.51255	0.872794
		0.145675				0.115964	1.25621						0.156299	0.192598		0.225012		0.694625	0.855946
														0.180164		0.225012			0.800684
														0.197317		0.225012			0.876917
														0.212328		0.225012			0.94363
