# Supplementary material for: Lipid kinases VPS34 and PIKfyve coordinate a phosphoinositide cascade to regulate retriever-mediated recycling on endosomes
Source: eLife journal article supplement (doi:10.7554/elife.69709), 2022-01-18
Supplement: fig9-figsupp1-data1 [file Figure 9-figure supplement 1.xlsx]

## Sheet: Sheet1
Figure 9-figure supplement 1
Impact of COMMD1 mutants on its ability to bind to CCDC93
	IP band intensity					Input intensity (COMMD1 expression)
EXP1	CCDC93 intensity	3xHA-COMMD1 mutants	CCDC93/COMMD1	Normalized to WT		3xHA-COMMD1 mutants	Normalized to WT
3xHA-COMMD1	13963.7	18686.1	0.747275	1		60009	1
3xHA-COMMD1-QAA	26557.8	45440.2	0.584455	0.782115		383352	6.38824
3xHA-COMMD1-EQE	7385.28	24625.1	0.299908	0.401335		109058	1.81736
EXP2	CCDC93 intensity	3xHA-COMMD1 mutants	CCDC93/COMMD1	Normalized to WT		26201	1
3xHA-COMMD1	31110.4	21575.3	1.44194	1		274308	10.4694
3xHA-COMMD1-QAA	32568.8	42561.5	0.765217	0.530685		31748	1.21171
3xHA-COMMD1-EQE	24044.9	26713.3	0.900108	0.624233
EXP3	CCDC93 intensity	3xHA-COMMD1 mutants	CCDC93/COMMD1	Normalized to WT		60545	1
3xHA-COMMD1	20449.6	12411.8	1.6476	1		490496	8.10135
3xHA-COMMD1-QAA	28444.8	35746	0.795745	0.482973		167040	2.75894
3xHA-COMMD1-EQE	11525.7	24238.3	0.475517	0.288612
